# Supplementary material
Source: PubMed Central journal article supplement (PMC3003944)
Supplement: NIHMS229912-supplement-01.pdf [file NIHMS229912-supplement-01.pdf]

| UniGene   | GeneID | Symbol        | Description                   | RefSeq mRNA    |
|-----------|--------|---------------|-------------------------------|----------------|
| Mm.103413 | 68350  | 0610009K11Rik | RIKEN cDNA 0610009K11 gene    | NM_026689.3    |
| Mm.281086 | 66839  | 0610009O20Rik | RIKEN cDNA 0610009O20 gene    | NM_024179.4    |
| Mm.39265  | 104457 | 0610010K14Rik | RIKEN cDNA 0610010K14 gene    | NM_026757.1    |
| Mm.347369 | 106264 | 0610012G03Rik | RIKEN cDNA 0610012G03 gene    | NM_025320.1    |
| Mm.121014 | 76897  | 0710005M24Rik | RIKEN cDNA 0710005M24 gene    | NM_178631.3    |
| Mm.133063 | 66123  | 1110006O24Rik | RIKEN cDNA 1110006O24 gene    | NM_021417.1    |
| Mm.27608  | 73737  | 1110008P14Rik | RIKEN cDNA 1110008P14 gene    | NM_198001.1    |
| Mm.30056  | 74778  | 1110014J01Rik | RIKEN cDNA 1110014J01 gene    | NM_029101.3    |
| Mm.331487 | 66185  | 1110037F02Rik | RIKEN cDNA 1110037F02 gene    | NM_001081183.1 |
| Mm.332931 | 319202 | 1200016E24Rik | RIKEN cDNA 1200016E24 gene    |                |
| Mm.390979 | 74157  | 1300018I05Rik | RIKEN cDNA 1300018I05 gene    | NM_028791.3    |
| Mm.150977 | 71997  | 1500002O20Rik | RIKEN cDNA 1500002O20 gene    | NM_028047.2    |
| Mm.285785 | 68964  | 1500010J02Rik | RIKEN cDNA 1500010J02 gene    | NM_026889.2    |
| Mm.268895 | 207740 | 1500031H01Rik | RIKEN cDNA 1500031H01 gene    | XM_978416.1    |
| Mm.349174 | 72012  | 1600020E01Rik | RIKEN cDNA 1600020E01 gene    | XM_899055.1    |
| Mm.251306 | 67077  | 1700019N12Rik | RIKEN cDNA 1700019N12 gene    | NM_001039494.2 |
| Mm.27711  | 67326  | 1700037H04Rik | RIKEN cDNA 1700037H04 gene    | NM_026091.2    |
| Mm.25311  | 66270  | 1810015C04Rik | RIKEN cDNA 1810015C04 gene    | NM_025459.2    |
| Mm.41451  | 66279  | 1810021J13Rik | RIKEN cDNA 1810021J13 gene    | NM_025464.2    |
| Mm.166485 | 66294  | 1810037C20Rik | RIKEN cDNA 1810037C20 gene    | NM_025473.2    |
| Mm.46699  | 208501 | 1810043H04Rik | RIKEN cDNA 1810043H04 gene    | XM_994211.1    |
| Mm.77697  | 76527  | 2010004A03Rik | RIKEN cDNA 2010004A03 gene    | NM_029646.1    |
| Mm.140672 | 100910 | 2010209O12Rik | RIKEN cDNA 2010209O12 gene    |                |
| Mm.292672 | 72357  | 2210016L21Rik | RIKEN cDNA 2210016L21 gene    | NM_028211.1    |
| Mm.276721 | 76429  | 2310007H09Rik | RIKEN cDNA 2310007H09 gene    | NM_029609.1    |
| Mm.383824 | 66374  | 2310011J03Rik | RIKEN cDNA 2310011J03 gene    | NM_025521.3    |
| Mm.21450  | 67695  | 2310016E02Rik | RIKEN cDNA 2310016E02 gene    | NM_024460.3    |
| Mm.188413 | 116972 | 2310047D13Rik | RIKEN cDNA 2310047D13 gene    | NM_027773.2    |
| Mm.250425 | 102122 | 2310065K24Rik | RIKEN cDNA 2310065K24 gene    | NM_028221.3    |
| Mm.41261  | 75687  | 2310066E14Rik | RIKEN cDNA 2310066E14 gene    | NM_001081241.2 |
| Mm.250193 | 70435  | 2610204M08Rik | RIKEN cDNA 2610204M08 gene    | NM_198411.2    |
| Mm.174044 | 214764 | 2700050L05Rik | RIKEN cDNA 2700050L05 gene    | NM_178115.3    |
| Mm.287157 | 67236  | 2810452K22Rik | RIKEN cDNA 2810452K22 gene    | NM_026048.3    |
| Mm.41180  | 75695  | 2900002H16Rik | RIKEN cDNA 2900002H16 gene    | NM_021430.2    |
| Mm.27344  | 72931  | 2900010J23Rik | RIKEN cDNA 2900010J23 gene    | NM_175190.3    |
| Mm.212543 | 78403  | 2900041M22Rik | RIKEN cDNA 2900041M22 gene    |                |
| Mm.196596 | 76482  | 3110002H16Rik | RIKEN cDNA 3110002H16 gene    | NM_029623.2    |
| Mm.3285   | 73218  | 3110056O03Rik | RIKEN cDNA 3110056O03 gene    | NM_175195.3    |
| Mm.24652  | 77574  | 3321401G04Rik | RIKEN cDNA 3321401G04 gene    | NM_029930.2    |
| Mm.213582 | 77590  | 4631426J05Rik | RIKEN cDNA 4631426J05 gene    | NM_029935.4    |
| Mm.24593  | 97820  | 4833439L19Rik | RIKEN cDNA 4833439L19 gene    | NM_133797.2    |
| Mm.179378 | 75317  | 4930547N16Rik | RIKEN cDNA 4930547N16 gene    | NM_029249.2    |
| Mm.35583  | 104859 | 4930573I19Rik | RIKEN cDNA 4930573I19 gene    | NM_001081057.1 |
| Mm.125857 | 108654 | 4933403F05Rik | RIKEN cDNA 4933403F05 gene    | NM_153794.4    |
| Mm.61180  | 71023  | 4933407C09Rik | RIKEN cDNA 4933407C09 gene    |                |
| Mm.323925 | 223739 | 5031439G07Rik | RIKEN cDNA 5031439G07 gene    | NM_001033273.2 |
| Mm.296838 | 230757 | 5730409E04Rik | RIKEN cDNA 5730409E04Rik gene | NM_001013755.2 |
| Mm.76166  | 68176  | 6230427J02Rik | RIKEN cDNA 6230427J02 gene    | NM_026597.2    |
| Mm.394573 | 70744  | 6330403L08Rik | RIKEN cDNA 6330403L08 gene    |                |
| Mm.390264 | 67412  | 6330407J23Rik | RIKEN cDNA 6330407J23 gene    | NM_026138.2    |
| Mm.74750  | 243300 | 6430598A04Rik | RIKEN cDNA 6430598A04 gene    | NM_175521.3    |
| Mm.352212 | 76213  | 6530406A20Rik | RIKEN cDNA 6530406A20 gene    |                |
| Mm.124498 | 268807 | 8230402K04Rik | RIKEN cDNA 8230402K04 gene    | NM_177755.3    |
| Mm.210949 | 71617  | 9130011E15Rik | RIKEN cDNA 9130011E15 gene    | NM_198296.2    |

|           |        |               |                                                                  |                |
|-----------|--------|---------------|------------------------------------------------------------------|----------------|
| Mm.251789 | 101351 | A130022J15Rik | RIKEN cDNA A130022J15 gene                                       | NM_175313.4    |
| Mm.392040 | 330166 | A230057G18Rik | RIKEN cDNA A230057G18 gene                                       | XM_989890.1    |
| Mm.271946 | 338371 | A730011L01Rik | RIKEN cDNA A730011L01 gene                                       | NM_177394.2    |
| Mm.405337 | 320516 | A730060N03Rik | RIKEN cDNA A730060N03 gene                                       |                |
| Mm.337771 | 192950 | AB182283      | cDNA sequence AB182283                                           | NM_001081652.1 |
| Mm.341004 | 27404  | Abca8b        | ATP-binding cassette, sub-family A (ABC                          | NM_013851.1    |
| Mm.379345 | 26357  | Abcg2         | ATP-binding cassette, sub-family G (WH                           | NM_011920.3    |
| Mm.258939 | 109934 | Abr           | active BCR-related gene                                          | NM_198895.1    |
| Mm.299636 | 171209 | Accn3         | amiloride-sensitive cation channel 3                             | NM_183000.2    |
| Mm.255464 | 11423  | Ache          | acetylcholinesterase                                             | NM_009599.3    |
| Mm.282039 | 104112 | Acly          | ATP citrate lyase                                                | NM_134037.2    |
| Mm.356689 | 11430  | Acox1         | acyl-Coenzyme A oxidase 1, palmitoyl                             | NM_015729.2    |
| Mm.28521  | 226977 | Actr1b        | ARP1 actin-related protein 1 homolog B                           | NM_146107.2    |
| Mm.183102 | 74117  | Actr3         | ARP3 actin-related protein 3 homolog (v                          | NM_023735.1    |
| Mm.359359 | 11496  | Adam22        | a disintegrin and metallopeptidase dom                           | NM_001098225.1 |
| Mm.268527 | 66548  | Adamts15      | ADAMTS-like 5                                                    | NM_025629.2    |
| Mm.215814 | 242669 | Adc           | arginine decarboxylase                                           | NM_172875.2    |
| Mm.31227  | 228061 | Agps          | alkylglycerone phosphate synthase                                | NM_172666.2    |
| Mm.383431 | 195040 | AI316787      | expressed sequence AI316787                                      | NM_199199.2    |
| Mm.313169 | 382643 | AI450948      | expressed sequence AI450948                                      | NM_001033476.1 |
| Mm.329684 | 107239 | AI790298      | expressed sequence AI790298                                      | XM_981543.1    |
| Mm.40038  | 72168  | Aifm3         | apoptosis-inducing factor, mitochondri                           | NM_175178.3    |
| Mm.30085  | 58810  | Akr1a4        | aldo-keto reductase family 1, member A                           | NM_021473.2    |
| Mm.6645   | 11651  | Akt1          | thymoma viral proto-oncogene 1                                   | NM_009652.2    |
| Mm.302724 | 11656  | Alas2         | aminolevulinic acid synthase 2, erythro                          | NM_009653.2    |
| Mm.273571 | 212647 | Aldh4a1       | aldehyde dehydrogenase 4 family, mem                             | NM_175438.3    |
| Mm.311854 | 11682  | Alk           | anaplastic lymphoma kinase                                       | NM_007439.2    |
| Mm.274093 | 11685  | Alox12e       | arachidonate lipoxygenase, epidermal                             | NM_145684.1    |
| Mm.41989  | 23801  | Aloxe3        | arachidonate lipoxygenase 3                                      | NM_011786.1    |
| Mm.2787   | 17117  | Amacr         | alpha-methylacyl-CoA racemase                                    | NM_008537.4    |
| Mm.130422 | 217473 | Ankmy2        | ankyrin repeat and MYND domain conta                             | NM_146033.2    |
| Mm.275554 | 68420  | Ankrd13a      | ankyrin repeat domain 13a                                        | NM_026718.2    |
| Mm.250989 | 74251  | Ankrd9        | ankyrin repeat domain 9                                          | NM_175207.4    |
| Mm.269088 | 11737  | Anp32a        | acidic (leucine-rich) nuclear phosphopr                          | NM_009672.2    |
| Mm.238343 | 12306  | Anxa2         | annexin A2                                                       | NM_007585.3    |
| Mm.274816 | 11764  | Ap1b1         | adaptor protein complex AP-1, beta 1 su                          | NM_007454.2    |
| Mm.253090 | 11772  | Ap2a2         | adaptor protein complex AP-2, alpha 2 s                          | NM_007459.2    |
| Mm.5159   | 11787  | Apbb2         | amyloid beta (A4) precursor protein-bin                          | NM_009686.1    |
| Mm.384171 | 11789  | Apc           | adenomatosis polyposis coli                                      | NM_007462.2    |
| Mm.25405  | 11838  | Arc           | activity regulated cytoskeletal-associate                        | NM_018790.2    |
| Mm.305796 | 56292  | Ard1          | N-acetyltransferase ARD1 homolog (S. c                           | NM_019870.2    |
| Mm.5061   | 11841  | Arf2          | ADP-ribosylation factor 2                                        | NM_007477.4    |
| Mm.329396 | 71302  | Arhgap26      | Rho GTPase activating protein 26                                 | NM_175164.4    |
| Mm.1383   | 14570  | Arhgdig       | Rho GDP dissociation inhibitor (GDI) gar                         | NM_008113.3    |
| Mm.240298 | 234094 | Arhgef10      | Rho guanine nucleotide exchange factor                           | NM_172751.2    |
| Mm.287267 | 213498 | Arhgef11      | Rho guanine nucleotide exchange factor                           | NM_001003912.1 |
| Mm.22085  | 56350  | Arl3          | ADP-ribosylation factor-like 3                                   | NM_019718.2    |
| Mm.29430  | 65105  | Arl6ip4       | ADP-ribosylation factor-like 6 interactin                        | NM_144509.2    |
| Mm.337038 | 76709  | Arpc2         | actin related protein 2/3 complex, subu                          | NM_029711.1    |
| Mm.260193 | 109689 | Arrb1         | arrestin, beta 1                                                 | NM_178220.3    |
| Mm.203747 | 216869 | Arrb2         | arrestin, beta 2                                                 | NM_145429.4    |
| Mm.22547  | 11886  | Asah1         | N-acylsphingosine amidohydrolase 1                               | NM_019734.1    |
| Mm.358931 | 245860 | Atg9a         | autophagy-related 9A (yeast)                                     | NM_001003917.3 |
| Mm.38010  | 108147 | Atic          | 5-aminoimidazole-4-carboxamide ribon                             | NM_026195.2    |
| Mm.280103 | 11928  | Atp1a1        | ATPase, Na <sup>+</sup> /K <sup>+</sup> transporting, alpha 1 pd | NM_144900.1    |

|           |        |               |                                                     |                |
|-----------|--------|---------------|-----------------------------------------------------|----------------|
| Mm.276137 | 11946  | Atp5a1        | ATP synthase, H <sup>+</sup> transporting, mitoch   | NM_007505.2    |
| Mm.340818 | 11975  | Atp6v0a1      | ATPase, H <sup>+</sup> transporting, lysosomal V0 s | NM_016920.2    |
| Mm.220823 | 110935 | Atp6v1b1      | ATPase, H <sup>+</sup> transporting, lysosomal V1 s | NM_134157.2    |
| Mm.30455  | 54667  | Atp8b2        | Atpase, class I, type 8B, member 2                  | NM_001081182.1 |
| Mm.231450 | 233871 | Atxn2l        | ataxin 2-like                                       | NM_183020.1    |
| Mm.92705  | 27215  | Azi2          | 5-azacytidine induced gene 2                        | NM_013727.3    |
| Mm.69013  | 329739 | B430201A12Rik | RIKEN cDNA B430201A12 gene                          | XM_990687.1    |
| Mm.44239  | 70369  | Bag5          | BCL2-associated athanogene 5                        | NM_027404.1    |
| Mm.309498 | 268515 | Bahcc1        | BAH domain and coiled-coil containing 1             | NM_198423.2    |
| Mm.272462 | 53761  | Bat2          | HLA-B associated transcript 2                       | NM_020027.2    |
| Mm.203962 | 224727 | Bat3          | HLA-B-associated transcript 3                       | NM_057171.1    |
| Mm.43745  | 193742 | Bat5          | HLA-B associated transcript 5                       | NM_178592.3    |
| Mm.25556  | 79554  | BC002216      | cDNA sequence BC002216                              | NM_024472.4    |
| Mm.224076 | 217827 | BC002230      | cDNA sequence BC002230                              | XM_975496.1    |
| Mm.11473  | 230789 | BC008163      | cDNA sequence BC008163                              | NM_145553.1    |
| Mm.247335 | 217216 | BC030867      | cDNA sequence BC030867                              | NM_153544.3    |
| Mm.151577 | 268747 | BC036313      | cDNA sequence BC036313                              | NM_001024645.1 |
| Mm.259234 | 232400 | BC048546      | cDNA sequence BC048546                              | NM_001001179.2 |
| Mm.26272  | 213056 | BC049806      | cDNA sequence BC049806                              | NM_172513.2    |
| Mm.29236  | 57278  | Bcam          | basal cell adhesion molecule                        | NM_020486.2    |
| Mm.4598   | 12032  | Bcan          | brevican                                            | NM_007529.1    |
| Mm.25848  | 12039  | Bckdha        | branched chain ketoacid dehydrogenase               | NM_007533.2    |
| Mm.6967   | 12050  | Bcl2l2        | Bcl2-like 2                                         | NM_007537.1    |
| Mm.89667  | 12055  | Bcl7c         | B-cell CLL/lymphoma 7C                              | NM_009746.2    |
| Mm.226175 | 77578  | Bcl9          | B-cell CLL/lymphoma 9                               | NM_029933.3    |
| Mm.294783 | 72567  | Bclaf1        | BCL2-associated transcription factor 1              | NM_153787.2    |
| Mm.288546 | 544971 | Bdp1          | B double prime 1, subunit of RNA polym              | NM_001081061.1 |
| Mm.2436   | 20893  | Bhlhb2        | basic helix-loop-helix domain containing            | NM_011498.4    |
| Mm.197387 | 76895  | Bicd2         | bicaudal D homolog 2 (Drosophila)                   | NM_029791.3    |
| Mm.24021  | 233016 | Blvrb         | biliverdin reductase B (flavin reductase)           | NM_144923.2    |
| Mm.104531 | 69168  | Bola1         | boLA-like 1 (E. coli)                               | NM_026975.2    |
| Mm.131074 | 67991  | Btbd14a       | BTB (POZ) domain containing 14A                     | NM_026495.3    |
| Mm.131700 | 320701 | C130034I18Rik | RIKEN cDNA C130034I18 gene                          | NM_177233.5    |
| Mm.244177 | 77521  | C130038G02Rik | RIKEN cDNA C130038G02 gene                          | NM_029920.5    |
| Mm.393367 | 99061  | C130057N11Rik | RIKEN cDNA C130057N11 gene                          |                |
| Mm.390374 | 69183  | C1qtnf2       | C1q and tumor necrosis factor related p             | NM_026979.3    |
| Mm.250641 | 77480  | C330002I19Rik | RIKEN cDNA C330002I19 gene                          | NM_001081378.1 |
| Mm.389259 | 109299 | C330006A16Rik | RIKEN cDNA C330006A16 gene                          | XM_975522.1    |
| Mm.128292 | 442847 | C330046G13Rik | RIKEN cDNA C330046G13 gene                          |                |
| Mm.101504 | 320827 | C530008M17Rik | RIKEN cDNA C530008M17 gene                          | XM_973124.1    |
| Mm.333624 | 232933 | C530028I08Rik | RIKEN cDNA C530028I08 gene                          | NM_001033314.3 |
| Mm.259334 | 235386 | C630028N24Rik | RIKEN cDNA C630028N24 gene                          | NM_177351.3    |
| Mm.331907 | 97130  | C77080        | expressed sequence C77080                           | NM_001033189.3 |
| Mm.275934 | 97863  | C78339        | expressed sequence C78339                           | NM_001033192.2 |
| Mm.179091 | 69008  | Cab39l        | calcium binding protein 39-like                     | NM_026908.3    |
| Mm.257404 | 104248 | Cabin1        | calcineurin binding protein 1                       | NM_172549.3    |
| Mm.379226 | 73660  | Cabp4         | calcium binding protein 4                           | NM_144532.2    |
| Mm.9772   | 12289  | Cacna1d       | calcium channel, voltage-dependent, L t             | NM_028981.2    |
| Mm.330524 | 94332  | Cadm3         | cell adhesion molecule 3                            | NM_053199.3    |
| Mm.178322 | 260299 | Cadm4         | cell adhesion molecule 4                            | NM_153112.3    |
| Mm.36834  | 227634 | Camsap1       | calmodulin regulated spectrin-associate             | XM_975399.1    |
| Mm.318846 | 100072 | Camta1        | calmodulin binding transcription activat            | NM_001081558.1 |
| Mm.326847 | 12337  | Capn5         | calpain 5                                           | NM_007602.3    |
| Mm.27736  | 12348  | Car11         | carbonic anhydrase 11                               | NM_009800.4    |
| Mm.306954 | 23831  | Car14         | carbonic anhydrase 14                               | NM_011797.2    |

|           |        |          |                                          |                |
|-----------|--------|----------|------------------------------------------|----------------|
| Mm.40120  | 192160 | Casc3    | cancer susceptibility candidate 3        | NM_138660.1    |
| Mm.270703 | 213819 | Casd1    | CAS1 domain containing 1                 | NM_145398.2    |
| Mm.383737 | 140721 | Caskin2  | cask-interacting protein 2               | NM_080643.2    |
| Mm.210403 | 104479 | Ccdc117  | coiled-coil domain containing 117        | NM_134033.1    |
| Mm.101586 | 67433  | Ccdc127  | coiled-coil domain containing 127        | NM_024201.2    |
| Mm.390150 | 245902 | Ccdc15   | coiled-coil domain containing 15         | NM_001081429.1 |
| Mm.78373  | 71870  | Ccdc19   | coiled-coil domain containing 19         | XM_993675.1    |
| Mm.292465 | 269336 | Ccdc32   | coiled-coil domain containing 32         | NM_199310.1    |
| Mm.275710 | 51938  | Ccdc39   | coiled-coil domain containing 39         | NM_026222.2    |
| Mm.344071 | 76380  | Ccdc46   | coiled-coil domain containing 46         | NM_145688.2    |
| Mm.289900 | 12468  | Cct7     | chaperonin subunit 7 (eta)               | NM_007638.3    |
| Mm.3460   | 12475  | Cd14     | CD14 antigen                             | NM_009841.3    |
| Mm.29742  | 12484  | Cd24a    | CD24a antigen                            | NM_009846.2    |
| Mm.182412 | 69957  | Cdc16    | CDC16 cell division cycle 16 homolog (S  | NM_027276.2    |
| Mm.28219  | 52858  | Cdipt    | CDP-diacylglycerol--inositol 3-phosphati | NM_138754.3    |
| Mm.6839   | 12567  | Cdk4     | cyclin-dependent kinase 4                | NM_009870.2    |
| Mm.142275 | 12569  | Cdk5r1   | cyclin-dependent kinase 5, regulatory su | NM_009871.2    |
| Mm.289427 | 66971  | Cdk5rap1 | CDK5 regulatory subunit associated pro   | NM_025876.2    |
| Mm.195663 | 12575  | Cdkn1a   | cyclin-dependent kinase inhibitor 1A (P2 | NM_007669.3    |
| Mm.284503 | 110911 | Cds2     | CDP-diacylglycerol synthase (phosphatic  | NM_138651.5    |
| Mm.24169  | 12607  | Cebpz    | CCAAT/enhancer binding protein zeta      | NM_001024806.2 |
| Mm.290563 | 12615  | Cenpa    | centromere protein A                     | NM_007681.2    |
| Mm.161470 | 229841 | Cenpe    | centromere protein E                     | NM_173762.4    |
| Mm.269991 | 545389 | Cep170   | centrosomal protein 170                  | XM_993066.1    |
| Mm.288729 | 16328  | Cep250   | centrosomal protein 250                  | NM_008383.2    |
| Mm.38910  | 28135  | Cep63    | centrosomal protein 63                   | NM_001081122.1 |
| Mm.10160  | 106143 | Cggbp1   | CGG triplet repeat binding protein 1     | NM_178647.2    |
| Mm.178246 | 216848 | Chd3     | chromodomain helicase DNA binding pr     | NM_146019.2    |
| Mm.333388 | 107932 | Chd4     | chromodomain helicase DNA binding pr     | NM_145979.2    |
| Mm.259916 | 218865 | Chdh     | choline dehydrogenase                    | NM_175343.4    |
| Mm.387173 | 12655  | Chi3l3   | chitinase 3-like 3                       | NM_009892.1    |
| Mm.73777  | 67064  | Chmp1b   | chromatin modifying protein 1B           | NM_024190.1    |
| Mm.168478 | 75786  | Ckap5    | cytoskeleton associated protein 5        | NM_029437.1    |
| Mm.252145 | 12716  | Ckmt1    | creatine kinase, mitochondrial 1, ubiqui | NM_009897.2    |
| Mm.270587 | 26373  | Clcn7    | chloride channel 7                       | NM_011930.3    |
| Mm.40132  | 64945  | Cldn12   | claudin 12                               | NM_022890.1    |
| Mm.280563 | 66864  | Clec14a  | C-type lectin domain family 14, member   | NM_025809.4    |
| Mm.169673 | 216705 | Clint1   | clathrin interactor 1                    | NM_001045520.2 |
| Mm.3990   | 20480  | Clpb     | ClpB caseinolytic peptidase B homolog    | NM_009191.3    |
| Mm.37984  | 215748 | Cnksr3   | Cnksr family member 3                    | NM_172546.2    |
| Mm.300931 | 12817  | Col13a1  | procollagen, type XIII, alpha 1          | NM_007731.1    |
| Mm.277735 | 12842  | Col1a1   | procollagen, type I, alpha 1             | NM_007742.3    |
| Mm.249555 | 12825  | Col3a1   | procollagen, type III, alpha 1           | NM_009930.1    |
| Mm.738    | 12826  | Col4a1   | procollagen, type IV, alpha 1            | NM_009931.1    |
| Mm.181021 | 12827  | Col4a2   | procollagen, type IV, alpha 2            | NM_009932.2    |
| Mm.7281   | 12831  | Col5a1   | procollagen, type V, alpha 1             | NM_015734.1    |
| Mm.10299  | 12832  | Col5a2   | procollagen, type V, alpha 2             | NM_007737.2    |
| Mm.334994 | 53867  | Col5a3   | procollagen, type V, alpha 3             | NM_016919.2    |
| Mm.40     | 26572  | Cops3    | COP9 (constitutive photomorphogenic)     | NM_011991.1    |
| Mm.276859 | 23789  | Coro1b   | coronin, actin binding protein 1B        | NM_011778.2    |
| Mm.196884 | 54188  | Cpsf4    | cleavage and polyadenylation specific fa | NM_178576.2    |
| Mm.41593  | 171508 | Creld1   | cysteine-rich with EGF-like domains 1    | NM_133930.1    |
| Mm.272093 | 54394  | Crlf3    | cytokine receptor-like factor 3          | NM_018776.1    |
| Mm.17616  | 26896  | Crsp2    | cofactor required for Sp1 transcriptiona | NM_012005.3    |
| Mm.313558 | 72832  | Crtac1   | cartilage acidic protein 1               | NM_145123.4    |

|           |        |               |                                           |                |
|-----------|--------|---------------|-------------------------------------------|----------------|
| Mm.21974  | 12988  | Csk           | c-src tyrosine kinase                     | NM_007783.2    |
| Mm.30199  | 27373  | Csnk1e        | casein kinase 1, epsilon                  | NM_013767.5    |
| Mm.29873  | 103236 | Csnk1g2       | casein kinase 1, gamma 2                  | NM_134002.1    |
| Mm.298893 | 12995  | Csnk2a1       | casein kinase 2, alpha 1 polypeptide      | NM_007788.2    |
| Mm.291928 | 12387  | Ctnnb1        | catenin (cadherin associated protein), b  | NM_007614.2    |
| Mm.255858 | 22083  | Ctr9          | Ctr9, Paf1/RNA polymerase II complex c    | NM_009431.1    |
| Mm.359633 | 19025  | Ctsa          | cathepsin A                               | NM_008906.3    |
| Mm.249744 | 52463  | Cxzc6         | CXXC finger 6                             | XM_980574.1    |
| Mm.22560  | 109754 | Cyb5r3        | cytochrome b5 reductase 3                 | NM_029787.2    |
| Mm.29196  | 66445  | Cyc1          | cytochrome c-1                            | NM_025567.2    |
| Mm.154358 | 76884  | Cyfp2         | cytoplasmic FMR1 interacting protein 2    | NM_133769.2    |
| Mm.287279 | 218978 | D14Erttd436e  | DNA segment, Chr 14, ERATO Doi 436, e     | NM_172599.3    |
| Mm.123240 | 223658 | D330001F17Rik | RIKEN cDNA D330001F17 gene                |                |
| Mm.29702  | 28146  | D3Ucla1       | DNA segment, Chr 3, University of Califo  | NM_030685.2    |
| Mm.28207  | 28027  | D4Wsu132e     | DNA segment, Chr 4, Wayne State Unive     | NM_138590.2    |
| Mm.244971 | 244418 | D8Erttd82e    | DNA segment, Chr 8, ERATO Doi 82, exp     | NM_172911.2    |
| Mm.59171  | 434147 | D930028M14Rik | RIKEN cDNA D930028M14 gene                | NM_001033781.1 |
| Mm.258310 | 272636 | D9Erttd280e   | DNA segment, Chr 9, ERATO Doi 280, ex     | NM_177775.3    |
| Mm.240830 | 13132  | Dab2          | disabled homolog 2 (Drosophila)           | NM_023118.4    |
| Mm.319038 | 13135  | Dad1          | defender against cell death 1             | NM_010015.3    |
| Mm.10294  | 13144  | Dapk3         | death-associated kinase 3                 | NM_007828.1    |
| Mm.148693 | 70248  | Dazap1        | DAZ associated protein 1                  | NM_133188.1    |
| Mm.291037 | 13178  | Dck           | deoxycytidine kinase                      | NM_007832.4    |
| Mm.28733  | 75901  | Dcp1a         | decapping enzyme                          | NM_133761.3    |
| Mm.167537 | 69654  | Dctn2         | dynactin 2                                | NM_027151.1    |
| Mm.298947 | 13202  | Ddt           | D-dopachrome tautomerase                  | NM_010027.1    |
| Mm.307515 | 71986  | Ddx28         | DEAD (Asp-Glu-Ala-Asp) box polypeptide    | NM_028038.2    |
| Mm.28222  | 68278  | Ddx39         | DEAD (Asp-Glu-Ala-Asp) box polypeptide    | NM_197982.2    |
| Mm.220038 | 13207  | Ddx5          | DEAD (Asp-Glu-Ala-Asp) box polypeptide    | NM_007840.3    |
| Mm.280594 | 67379  | Dedd2         | death effector domain-containing DNA      | NM_207677.3    |
| Mm.314923 | 104418 | Dgkz          | diacylglycerol kinase zeta                | NM_138306.1    |
| Mm.35399  | 216877 | Dhx33         | DEAH (Asp-Glu-Ala-His) box polypeptide    | NM_178367.4    |
| Mm.44995  | 208666 | Diras1        | DIRAS family, GTP-binding RAS-like 1      | NM_145217.2    |
| Mm.221499 | 214240 | Disp2         | dispatched homolog 2 (Drosophila)         | NM_170593.2    |
| Mm.60526  | 233335 | Dmn           | desmuslin                                 | NM_207663.2    |
| Mm.279692 | 56445  | Dnaja2        | DnaJ (Hsp40) homolog, subfamily A, me     | NM_019794.3    |
| Mm.21353  | 230935 | Dnajc11       | DnaJ (Hsp40) homolog, subfamily C, me     | NM_172704.2    |
| Mm.288159 | 54152  | Dnalc4        | dynein, axonemal, light chain 4           | NM_017470.1    |
| Mm.44736  | 13429  | Dnm1          | dynamin 1                                 | NM_010065.2    |
| Mm.203949 | 114255 | Dok4          | docking protein 4                         | NM_053246.1    |
| Mm.331970 | 53902  | Dscr1l2       | Down syndrome critical region gene 1-li   | NM_022980.4    |
| Mm.336625 | 13518  | Dst           | dystonin                                  | NM_134448.2    |
| Mm.94371  | 13527  | Dtna          | dystrobrevin alpha                        | NM_207650.3    |
| Mm.247695 | 207521 | Dtx4          | deltex 4 homolog (Drosophila)             | NM_172442.2    |
| Mm.293973 | 224907 | Dus3l         | dihydrouridine synthase 3-like (S. cerevi | NM_144858.1    |
| Mm.330671 | 252864 | Dusp15        | dual specificity phosphatase-like 15      | NM_145744.2    |
| Mm.23916  | 66959  | Dusp26        | dual specificity phosphatase 26 (putativ  | NM_025869.3    |
| Mm.1791   | 67603  | Dusp6         | dual specificity phosphatase 6            | NM_026268.2    |
| Mm.181430 | 13424  | Dync1h1       | dynein cytoplasmic 1 heavy chain 1        | NM_030238.2    |
| Mm.249479 | 13427  | Dync1i2       | dynein cytoplasmic 1 intermediate chair   | NM_010064.3    |
| Mm.23296  | 50496  | E2f6          | E2F transcription factor 6                | NM_033270.1    |
| Mm.153688 | 93726  | Ear11         | eosinophil-associated, ribonuclease A fa  | NM_053113.2    |
| Mm.275426 | 70790  | Edd1          | E3 ubiquitin protein ligase, HECT domain  | NM_001081359.1 |
| Mm.4772   | 14745  | Edg2          | endothelial differentiation, lysophospha  | NM_010336.1    |
| Mm.258927 | 66656  | Eef1d         | eukaryotic translation elongation factor  | NM_029663.1    |



|           |           |                    |                                            |                |
|-----------|-----------|--------------------|--------------------------------------------|----------------|
| Mm.25997  | 13631     | Eef2k              | eukaryotic elongation factor-2 kinase      | NM_007908.3    |
| Mm.422725 | 209589    | EG209589           | predicted gene, EG209589                   | XM_910432.2    |
| Mm.180719 | 245190    | EG245190           | predicted gene, EG245190                   | XM_905189.2    |
| Mm.389421 | 381438    | EG381438           | predicted gene, EG381438                   | NM_198657.2    |
| Mm.359137 | 384885    | EG384885           | predicted gene, EG384885                   | XM_992779.1    |
| Mm.422907 | 433230    | EG433230           | predicted gene, EG433230                   | XM_484785.3    |
| Mm.321484 | 545864    | EG545864           | predicted gene, EG545864                   | XR_002969.1    |
| Mm.389923 | 620480    | EG620480           | predicted gene, EG620480                   | XM_983464.1    |
| Mm.312048 | 626920    | EG626920           | predicted gene, EG626920                   | XM_986974.1    |
| Mm.422746 | 628781    | EG628781           | predicted gene, EG628781                   | XM_924870.2    |
| Mm.389633 | 666405    | EG666405           | predicted gene, EG666405                   | -              |
| Mm.391207 | 666538    | EG666538           | predicted gene, EG666538                   | XM_984437.1    |
| Mm.362367 | 667290    | EG667290           | predicted gene, EG667290                   | XR_002003.1    |
| Mm.285021 | 667682    | EG667682           | predicted gene, EG667682                   | XM_991853.1    |
| Mm.294623 | 66235     | Eif1ay             | eukaryotic translation initiation factor 1 | NM_025437.4    |
| Mm.217616 | 27103     | Eif2ak4            | eukaryotic translation initiation factor 2 | NM_013719.1    |
| Mm.34612  | 108067    | Eif2b3             | eukaryotic translation initiation factor 2 | NM_175135.3    |
| Mm.250874 | 54709     | Eif3s2             | eukaryotic translation initiation factor 3 | NM_018799.1    |
| Mm.227183 | 26987     | Eif4e2             | eukaryotic translation initiation factor 4 | NM_023314.3    |
| Mm.259516 | 13688     | Eif4ebp2           | eukaryotic translation initiation factor 4 | NM_010124.2    |
| Mm.27955  | 22384     | Eif4h              | eukaryotic translation initiation factor 4 | NM_033561.1    |
| Mm.3970   | 15572     | Elavl4             | ELAV (embryonic lethal, abnormal visio     | NM_010488.3    |
| Mm.236645 | 68519     | Em1                | echinoderm microtubule associated pro      | NM_001043336.1 |
| Mm.41423  | 71946     | Endod1             | endonuclease domain containing 1           | NM_028013.2    |
| Mm.30145  | 83965     | Enpp5              | ectonucleotide pyrophosphatase/phosp       | NM_032003.1    |
| Mm.297516 | 791299    | ENSMUSG00000059659 | predicted gene, ENSMUSG00000059659         |                |
| Mm.387663 | 100038425 | ENSMUSG00000074414 | predicted gene, ENSMUSG00000074414         |                |
| Mm.248620 | 71889     | Epn3               | epsin 3                                    | NM_027984.2    |
| Mm.59812  | 67456     | Ergic2             | ERGIC and golgi 2                          | NM_026355.2    |
| Mm.392449 | 102058    | Exoc8              | exocyst complex component 8                | NM_198103.2    |
| Mm.266635 | 50912     | Exosc10            | exosome component 10                       | NM_016699.1    |
| Mm.334810 | 72544     | Exosc6             | exosome component 6                        | NM_028274.2    |
| Mm.41739  | 58193     | Extl2              | exotoses (multiple)-like 2                 | NM_021388.3    |
| Mm.3355   | 14103     | Fasf               | Fas ligand (TNF superfamily, member 6)     | NM_010177.3    |
| Mm.236443 | 14104     | Fasn               | fatty acid synthase                        | NM_007988.3    |
| Mm.334764 | 50788     | Fbxl8              | F-box and leucine-rich repeat protein 8    | NM_015821.1    |
| Mm.24829  | 76454     | Fbxo31             | F-box protein 31                           | NM_133765.2    |
| Mm.28584  | 71538     | Fbxo9              | f-box protein 9                            | NM_023605.2    |
| Mm.196475 | 50754     | Fbxw7              | F-box and WD-40 domain protein 7, arc      | NM_080428.2    |
| Mm.263041 | 207278    | Fchsd2             | FCH and double SH3 domains 2               | NM_199012.1    |
| Mm.280819 | 14158     | Fert2              | fer (fms/fps related) protein kinase, test | NM_008000.1    |
| Mm.265716 | 14182     | Fgfr1              | fibroblast growth factor receptor 1        | NM_010206.2    |
| Mm.333499 | 67529     | Fgfr1op2           | FGFR1 oncogene partner 2                   | NM_026218.2    |
| Mm.3126   | 14199     | Fhl1               | four and a half LIM domains 1              | NM_010211.2    |
| Mm.23049  | 70598     | Filip1             | filamin A interacting protein 1            | NM_001081243.1 |
| Mm.38911  | 23877     | Fiz1               | Flt3 interacting zinc finger protein 1     | NM_011813.2    |
| Mm.193099 | 14268     | Fn1                | fibronectin 1                              | NM_010233.1    |
| Mm.78250  | 17425     | Foxk1              | forkhead box K1                            | NM_199068.2    |
| Mm.24783  | 666060    | Frmpd1             | FERM and PDZ domain containing 1           | NM_001081172.2 |
| Mm.135965 | 327826    | Frs2               | fibroblast growth factor receptor substr   | NM_177798.3    |
| Mm.89912  | 107971    | Frs3               | fibroblast growth factor receptor substr   | NM_144939.2    |
| Mm.30357  | 14325     | Ftl1               | ferritin light chain 1                     | NM_010240.2    |
| Mm.276298 | 70300     | Fuz                | fuzzy homolog (Drosophila)                 | NM_027376.1    |
| Mm.22742  | 11936     | Fxyd2              | FXYD domain-containing ion transport r     | NM_052823.2    |
| Mm.246003 | 14362     | Fzd1               | frizzled homolog 1 (Drosophila)            | NM_021457.2    |

|           |        |          |                                            |                |
|-----------|--------|----------|--------------------------------------------|----------------|
| Mm.4793   | 14387  | Gaa      | glucosidase, alpha, acid                   | NM_008064.2    |
| Mm.32191  | 54393  | Gabbr1   | gamma-aminobutyric acid (GABA-B) rec       | NM_019439.3    |
| Mm.423024 | 14433  | Gapdh    | glyceraldehyde-3-phosphate dehydroge       | NM_008084.2    |
| Mm.24038  | 14468  | Gbp1     | guanylate nucleotide binding protein 1     | NM_010259.2    |
| Mm.88367  | 14585  | Gfra1    | glial cell line derived neurotrophic facto | NM_010279.2    |
| Mm.41757  | 207182 | Ggtl3    | gamma-glutamyltransferase-like 3           | NM_144786.1    |
| Mm.78118  | 70893  | Glb1l3   | galactosidase, beta 1 like 3               | XM_983469.1    |
| Mm.276271 | 20340  | Glg1     | golgi apparatus protein 1                  | NM_009149.2    |
| Mm.30102  | 216456 | Gls2     | glutaminase 2 (liver, mitochondrial)       | NM_001033264.2 |
| Mm.36745  | 269037 | Gm672    | gene model 672, (NCBI)                     | NM_201354.2    |
| Mm.379511 | 381353 | Gm996    | gene model 996, (NCBI)                     | NM_001005424.2 |
| Mm.321452 | 23885  | Gmcl1    | germ cell-less homolog 1 (Drosophila)      | NM_011818.2    |
| Mm.370185 | 14673  | Gna12    | guanine nucleotide binding protein, alpi   | NM_010302.2    |
| Mm.196464 | 14678  | Gnai2    | guanine nucleotide binding protein, alpi   | NM_008138.4    |
| Mm.68889  | 14695  | Gnb3     | guanine nucleotide binding protein, bet    | NM_013530.1    |
| Mm.17604  | 14697  | Gnb5     | guanine nucleotide binding protein, bet    | NM_138719.3    |
| Mm.29114  | 14712  | Gnpat    | glyceronephosphate O-acyltransferase       | NM_010322.2    |
| Mm.9392   | 269682 | Golga3   | golgi autoantigen, golgin subfamily a, 3   | NM_008146.3    |
| Mm.196269 | 57437  | Golga7   | golgi autoantigen, golgin subfamily a, 7   | NM_020585.2    |
| Mm.297976 | 14733  | Gpc1     | glypican 1                                 | NM_016696.3    |
| Mm.252391 | 14555  | Gpd1     | glycerol-3-phosphate dehydrogenase 1       | NM_010271.2    |
| Mm.290834 | 14766  | Gpr56    | G protein-coupled receptor 56              | NM_018882.2    |
| Mm.73666  | 229714 | Gpr61    | G protein-coupled receptor 61              | NM_175470.3    |
| Mm.271980 | 67298  | Gprasp1  | G protein-coupled receptor associated s    | NM_026081.5    |
| Mm.30195  | 209318 | Gps1     | G protein pathway suppressor 1             | NM_145370.1    |
| Mm.1090   | 14775  | Gpx1     | glutathione peroxidase 1                   | NM_008160.5    |
| Mm.359573 | 625249 | Gpx4     | glutathione peroxidase 4                   | NM_008162.2    |
| Mm.27366  | 52857  | Gramd1a  | GRAM domain containing 1A                  | NM_027898.3    |
| Mm.138434 | 235283 | Gramd1b  | GRAM domain containing 1B                  | NM_172768.1    |
| Mm.41665  | 66168  | Grina    | glutamate receptor, ionotropic, N-meth     | NM_023168.3    |
| Mm.194811 | 54645  | Gripap1  | GRIP1 associated protein 1                 | NM_207670.1    |
| Mm.218752 | 14843  | Gsh2     | genomic screened homeo box 2               | NM_133256.2    |
| Mm.294664 | 606496 | Gsk3a    | glycogen synthase kinase 3 alpha           | NM_001031667.1 |
| Mm.2662   | 14860  | Gsta4    | glutathione S-transferase, alpha 4         | NM_010357.2    |
| Mm.378931 | 14873  | Gsto1    | glutathione S-transferase omega 1          | NM_010362.2    |
| Mm.261570 | 14886  | Gtf2i    | general transcription factor II I          | NM_010365.3    |
| Mm.289645 | 17263  | Gtl2     | GTL2, imprinted maternally expressed u     | NM_144513.2    |
| Mm.275654 | 14936  | Gys1     | glycogen synthase 1, muscle                | NM_030678.3    |
| Mm.359030 | 353502 | Hcfc1r1  | host cell factor C1 regulator 1 (XPO1-de   | NM_181821.1    |
| Mm.715    | 15162  | Hck      | hemopoietic cell kinase                    | NM_010407.3    |
| Mm.279188 | 15193  | Hdgfrp2  | hepatoma-derived growth factor, relate     | NM_008233.2    |
| Mm.249391 | 207304 | Hectd1   | HECT domain containing 1                   | XM_981716.1    |
| Mm.29151  | 64209  | Herpud1  | homocysteine-inducible, endoplasmic re     | NM_022331.1    |
| Mm.28326  | 52120  | Hgsnat   | heparan-alpha-glucosaminide N-acetyltr     | NM_029884.1    |
| Mm.3879   | 15251  | Hif1a    | hypoxia inducible factor 1, alpha subuni   | NM_010431.1    |
| Mm.389331 | 15259  | Hipk3    | homeodomain interacting protein kinas      | NM_010434.1    |
| Mm.386076 | 327655 | Hisppd2a | histidine acid phosphatase domain cont     | NM_178795.4    |
| Mm.30921  | 110948 | Hlcs     | holocarboxylase synthetase (biotin- [pro   | NM_139145.4    |
| Mm.4438   | 15361  | Hmga1    | high mobility group AT-hook 1              | NM_016660.2    |
| Mm.61526  | 208715 | Hmgcs1   | 3-hydroxy-3-methylglutaryl-Coenzyme A      | NM_145942.4    |
| Mm.289131 | 15360  | Hmgcs2   | 3-hydroxy-3-methylglutaryl-Coenzyme A      | NM_008256.3    |
| Mm.5      | 15395  | Hoxa10   | homeo box A10                              | NM_008263.1    |
| Mm.12863  | 23908  | Hs2st1   | heparan sulfate 2-O-sulfotransferase 1     | NM_011828.2    |
| Mm.157103 | 101502 | Hsd3b7   | hydroxy-delta-5-steroid dehydrogenase      | NM_133943.2    |
| Mm.39739  | 73442  | Hspa12a  | heat shock protein 12A                     | NM_175199.3    |

|           |        |         |                                            |             |
|-----------|--------|---------|--------------------------------------------|-------------|
| Mm.209419 | 15526  | Hspa9   | heat shock protein 9                       | NM_010481.1 |
| Mm.271798 | 15547  | Htf9c   | HpaII tiny fragments locus 9c              | NM_008307.2 |
| Mm.27372  | 59026  | Huwe1   | HECT, UBA and WWE domain containing        | NM_021523.4 |
| Mm.193212 | 68180  | Hyi     | hydroxypyruvate isomerase homolog (E       | NM_026601.1 |
| Mm.277464 | 57295  | Icmt    | isoprenylcysteine carboxyl methyltransf    | NM_133788.1 |
| Mm.110    | 15903  | Id3     | inhibitor of DNA binding 3                 | NM_008321.1 |
| Mm.29590  | 170718 | Idh3b   | isocitrate dehydrogenase 3 (NAD+) beta     | NM_130884.3 |
| Mm.14825  | 15929  | Idh3g   | isocitrate dehydrogenase 3 (NAD+), gam     | NM_008323.1 |
| Mm.45558  | 70110  | Ifi35   | interferon-induced protein 35              | NM_027320.4 |
| Mm.275742 | 16001  | Igf1r   | insulin-like growth factor I receptor      | NM_010513.2 |
| Mm.10137  | 16170  | Il16    | interleukin 16                             | NM_010551.3 |
| Mm.27567  | 14204  | Il4i1   | interleukin 4 induced 1                    | NM_010215.2 |
| Mm.2644   | 216136 | Ilvbl   | ilvB (bacterial acetolactate synthase)-lik | NM_173751.3 |
| Mm.272253 | 66541  | Immmp1l | IMP1 inner mitochondrial membrane pe       | NM_028260.2 |
| Mm.262547 | 28019  | Ing4    | inhibitor of growth family, member 4       | NM_133345.2 |
| Mm.292942 | 68510  | Ints1   | integrator complex subunit 1               | NM_026748.1 |
| Mm.252421 | 70885  | Ints10  | integrator complex subunit 10              | NM_027590.3 |
| Mm.271642 | 226432 | Ipo9    | importin 9                                 | NM_153774.1 |
| Mm.105218 | 16362  | Irf1    | interferon regulatory factor 1             | NM_008390.1 |
| Mm.274237 | 272359 | Irf2bp1 | interferon regulatory factor 2 binding pr  | NM_178757.3 |
| Mm.57035  | 16400  | Itga3   | integrin alpha 3                           | NM_013565.2 |
| Mm.28541  | 16450  | Jag2    | jagged 2                                   | NM_010588.2 |
| Mm.289657 | 16451  | Jak1    | Janus kinase 1                             | NM_146145.2 |
| Mm.307239 | 77035  | Jmjd5   | jumonji domain containing 5                | NM_029842.3 |
| Mm.275071 | 16476  | Jun     | Jun oncogene                               | NM_010591.1 |
| Mm.1167   | 16477  | Junb    | Jun-B oncogene                             | NM_008416.1 |
| Mm.28382  | 74187  | Katnb1  | katanin p80 (WD40-containing) subunit      | NM_028805.2 |
| Mm.388924 | 16498  | Kcnab2  | potassium voltage-gated channel, shake     | NM_010598.2 |
| Mm.387390 | 16500  | Kcnb1   | potassium voltage gated channel, Shab-     | NM_008420.3 |
| Mm.374793 | 16512  | Kcnh3   | potassium voltage-gated channel, subfa     | NM_010601.2 |
| Mm.4970   | 16515  | Kcnj12  | potassium inwardly-rectifying channel, s   | NM_010603.4 |
| Mm.10800  | 16525  | Kcnk1   | potassium channel, subfamily K, membe      | NM_008430.1 |
| Mm.387016 | 16526  | Kcnk2   | potassium channel, subfamily K, membe      | NM_010607.1 |
| Mm.435    | 66989  | Kctd20  | potassium channel tetramerisation dom      | NM_025888.5 |
| Mm.8256   | 20218  | Khdrbs1 | KH domain containing, RNA binding, sig     | NM_011317.3 |
| Mm.276408 | 16560  | Kif1a   | kinesin family member 1A                   | NM_008440.2 |
| Mm.41379  | 16564  | Kif21a  | kinesin family member 21A                  | NM_016705.2 |
| Mm.30355  | 16572  | Kif5a   | kinesin family member 5A                   | NM_008447.3 |
| Mm.4651   | 16579  | Kifap3  | kinesin-associated protein 3               | NM_010629.2 |
| Mm.201493 | 16597  | Klf12   | Kruppel-like factor 12                     | NM_010636.2 |
| Mm.26938  | 16598  | Klf2    | Kruppel-like factor 2 (lung)               | NM_008452.1 |
| Mm.275036 | 23849  | Klf6    | Kruppel-like factor 6                      | NM_011803.2 |
| Mm.251013 | 16211  | Kpnb1   | karyopherin (importin) beta 1              | NM_008379.3 |
| Mm.1249   | 226519 | Lamc1   | laminin, gamma 1                           | NM_010683.1 |
| Mm.20522  | 14768  | Lancl1  | LanC (bacterial lantibiotic synthetase co  | NM_021295.2 |
| Mm.248843 | 73158  | Larp1   | La ribonucleoprotein domain family, me     | XM_985836.1 |
| Mm.276076 | 102436 | Lars2   | leucyl-tRNA synthetase, mitochondrial      | NM_153168.2 |
| Mm.390821 | 71949  | Lass5   | longevity assurance homolog 5 (S. cerev    | NM_028015.2 |
| Mm.26751  | 16828  | Ldha    | lactate dehydrogenase A                    | NM_010699.1 |
| Mm.258142 | 57275  | Lenep   | lens epithelial protein                    | NM_020517.3 |
| Mm.22831  | 232798 | Leng8   | leukocyte receptor cluster (LRC) membe     | NM_172736.3 |
| Mm.27961  | 56401  | Lepre1  | leprecan 1                                 | NM_019783.2 |
| Mm.298251 | 56839  | Lgi1    | leucine-rich repeat LGI family, member     | NM_020278.2 |
| Mm.124176 | 16886  | Limk2   | LIM motif-containing protein kinase 2      | NM_173053.1 |
| Mm.390323 | 16886  | Limk2   | LIM motif-containing protein kinase 2      | NM_173053.1 |



|           |        |           |                                                                  |                |
|-----------|--------|-----------|------------------------------------------------------------------|----------------|
| Mm.268018 | 66643  | Lix1      | limb expression 1 homolog (chicken)                              | NM_025681.2    |
| Mm.44814  | 109593 | Lmo3      | LIM domain only 3                                                | NM_207222.2    |
| Mm.339061 | 432482 | LOC432482 | similar to nucleoside diphosphate kinase                         | XR_003641.1    |
| Mm.320353 | 433955 | LOC433955 | similar to HSPC008                                               | XR_002848.1    |
| Mm.250479 | 544863 | LOC544863 | similar to tubulin, alpha 1                                      | XR_002982.1    |
| Mm.375464 | 545798 | LOC545798 | similar to MGC79481 protein                                      | XM_992002.1    |
| Mm.389395 | 625137 | LOC625137 | similar to Ubiquinol-cytochrome c reductase                      | XM_889680.1    |
| Mm.386029 | 626802 | LOC626802 | similar to zinc finger protein 709                               | XM_894982.2    |
| Mm.244815 | 628101 | LOC628101 | hypothetical LOC628101                                           | XM_993945.1    |
| Mm.416138 | 666761 | LOC666761 | similar to alpha NAC/1.9.2. protein                              | XM_985849.1    |
| Mm.37324  | 668378 | LOC668378 | similar to Protein FAM38A                                        | XM_001001160.1 |
| Mm.391104 | 67527  | LOC67527  | murine leukemia retrovirus                                       | -              |
| Mm.329675 | 225875 | Lrfn4     | leucine rich repeat and fibronectin type III domain containing 4 | NM_153388.3    |
| Mm.289666 | 378937 | Lrrc24    | leucine rich repeat containing 24                                | NM_198119.2    |
| Mm.31247  | 67867  | Lrrc28    | leucine rich repeat containing 28                                | NM_175124.4    |
| Mm.259079 | 268490 | Lsm12     | LSM12 homolog ( <i>S. cerevisiae</i> )                           | NM_172947.3    |
| Mm.257067 | 23936  | Lynx1     | Ly6/neurotoxin 1                                                 | NM_011838.4    |
| Mm.341945 | 217779 | Lysmd1    | LysM, putative peptidoglycan-binding domain                      | NM_153121.1    |
| Mm.28204  | 226154 | Lzts2     | leucine zipper, putative tumor suppressor                        | NM_145503.1    |
| Mm.36410  | 228355 | Madd      | MAP-kinase activating death domain                               | NM_145527.3    |
| Mm.330745 | 16658  | Mafb      | v-maf musculoaponeurotic fibrosarcoma oncogene                   | NM_010658.2    |
| Mm.241355 | 17136  | Mag       | myelin-associated glycoprotein                                   | NM_010758.2    |
| Mm.22575  | 80884  | Maged2    | melanoma antigen, family D, 2                                    | NM_030700.1    |
| Mm.264849 | 99470  | Magi3     | membrane associated guanylate kinase, gamma 3                    | NM_133853.2    |
| Mm.359472 | 270118 | Maml2     | mastermind like 2 ( <i>Drosophila</i> )                          | NM_001013819.1 |
| Mm.18905  | 230815 | Man1c1    | mannosidase, alpha, class 1C, member 1                           | NM_207237.2    |
| Mm.4219   | 17159  | Man2b1    | mannosidase 2, alpha B1                                          | NM_010764.2    |
| Mm.14487  | 26399  | Map2k6    | mitogen activated protein kinase kinase 6                        | NM_011943.2    |
| Mm.19223  | 212679 | Mars2     | methionine-tRNA synthetase 2 (mitochondrial)                     | NM_175439.3    |
| Mm.154614 | 56527  | Mast1     | microtubule associated serine/threonine kinase 1                 | NM_019945.2    |
| Mm.29815  | 232087 | Mat2a     | methionine adenosyltransferase II, alpha                         | NM_145569.4    |
| Mm.392350 | 17196  | Mbp       | myelin basic protein                                             | NM_010777.3    |
| Mm.334413 | 17207  | Mcf2l     | mcf.2 transforming sequence-like                                 | NM_178076.2    |
| Mm.1639   | 17210  | Mcl1      | myeloid cell leukemia sequence 1                                 | NM_008562.3    |
| Mm.383472 | 51812  | Mcrs1     | microspherule protein 1                                          | NM_016766.2    |
| Mm.297096 | 17448  | Mdh2      | malate dehydrogenase 2, NAD (mitochondrial)                      | NM_008617.2    |
| Mm.283045 | 66999  | Med28     | mediator of RNA polymerase II transcription                      | NM_025895.3    |
| Mm.272998 | 80889  | Mesdc1    | mesoderm development candidate 1                                 | NM_030705.4    |
| Mm.335639 | 17294  | Mest      | mesoderm specific transcript                                     | NM_008590.1    |
| Mm.139146 | 76781  | Mettl4    | methyltransferase like 4                                         | NM_176917.4    |
| Mm.7386   | 17150  | Mfap2     | microfibrillar-associated protein 2                              | NM_008546.2    |
| Mm.390345 | 69900  | Mfsd11    | major facilitator superfamily domain containing 11               | NM_178620.3    |
| Mm.299693 | 17309  | Mgat3     | mannoside acetylglucosaminyltransferase III                      | NM_010795.3    |
| Mm.272197 | 23945  | Mgll      | monoglyceride lipase                                             | NM_011844.3    |
| Mm.24570  | 102423 | Mizf      | MBD2-interacting zinc finger                                     | NM_172162.2    |
| Mm.4406   | 17395  | Mmp9      | matrix metalloproteinase 9                                       | NM_013599.2    |
| Mm.3759   | 17428  | Mnt       | max binding protein                                              | NM_010813.2    |
| Mm.41355  | 68929  | Mospd3    | motile sperm domain containing 3                                 | NM_030037.1    |
| Mm.9986   | 17528  | Mpz       | myelin protein zero                                              | NM_008623.3    |
| Mm.183561 | 244238 | Mrgpre    | MAS-related GPR, member E                                        | NM_175534.2    |
| Mm.290166 | 67681  | Mrpl18    | mitochondrial ribosomal protein L18                              | NM_026310.3    |
| Mm.29974  | 60441  | Mrpl38    | mitochondrial ribosomal protein L38                              | NM_024177.3    |
| Mm.28023  | 56428  | Mtch2     | mitochondrial carrier homolog 2 ( <i>C. elegans</i> )            | NM_019758.2    |
| Mm.423278 | 17772  | Mtm1      | X-linked myotubular myopathy gene 1                              | NM_019926.2    |
| Mm.247007 | 219135 | Mtmr6     | myotubularin related protein 6                                   | NM_144843.3    |

|           |        |         |                                           |                |
|-----------|--------|---------|-------------------------------------------|----------------|
| Mm.228797 | 78388  | Mvp     | major vault protein                       | NM_080638.2    |
| Mm.159028 | 74761  | Mxra8   | matrix-remodelling associated 8           | NM_024263.3    |
| Mm.2444   | 17869  | Myc     | myelocytomatosis oncogene                 | NM_010849.4    |
| Mm.4048   | 17872  | Myd116  | myeloid differentiation primary response  | NM_008654.1    |
| Mm.234502 | 17913  | Myo1c   | myosin IC                                 | NM_008659.3    |
| Mm.240965 | 230085 | N28178  | expressed sequence N28178                 | NM_172690.2    |
| Mm.89961  | 17948  | Naip2   | NLR family, apoptosis inhibitory protein  | NM_010872.1    |
| Mm.290407 | 53605  | Nap11   | nucleosome assembly protein 1-like 1      | NM_015781.3    |
| Mm.292687 | 108123 | Napg    | N-ethylmaleimide sensitive fusion prote   | NM_028017.1    |
| Mm.274610 | 269642 | Nat8l   | N-acetyltransferase 8-like                | NM_001001985.3 |
| Mm.205224 | 269198 | Nbeal1  | neurobeachin like 1                       | XM_990954.1    |
| Mm.233080 | 228869 | Ncoa5   | nuclear receptor coactivator 5            | NM_144892.1    |
| Mm.248778 | 67273  | Ndufa10 | NADH dehydrogenase (ubiquinone) 1 al      | NM_024197.1    |
| Mm.29867  | 17991  | Ndufa2  | NADH dehydrogenase (ubiquinone) 1 al      | NM_010885.4    |
| Mm.29939  | 66108  | Ndufa9  | NADH dehydrogenase (ubiquinone) 1 al      | NM_025358.2    |
| Mm.2033   | 66495  | Ndufb3  | NADH dehydrogenase (ubiquinone) 1 be      | NM_025597.2    |
| Mm.379154 | 68194  | Ndufb4  | NADH dehydrogenase (ubiquinone) 1 be      | NM_026610.1    |
| Mm.21669  | 226646 | Ndufs2  | NADH dehydrogenase (ubiquinone) Fe-S      | NM_153064.4    |
| Mm.288114 | 67602  | Necap1  | NECAP endocytosis associated 1            | NM_026267.2    |
| Mm.298283 | 380684 | Nefh    | neurofilament, heavy polypeptide          | NM_010904.3    |
| Mm.1956   | 18039  | Nefl    | neurofilament, light polypeptide          | NM_010910.1    |
| Mm.390700 | 18040  | Nefm    | neurofilament, medium polypeptide         | NM_008691.2    |
| Mm.42249  | 18007  | Neo1    | neogenin                                  | NM_008684.2    |
| Mm.380307 | 269116 | Nfasc   | neurofascin                               | NM_182716.2    |
| Mm.31274  | 18027  | Nfia    | nuclear factor I/A                        | NM_010905.2    |
| Mm.121508 | 245537 | Nlgn3   | neuroligin 3                              | NM_172932.2    |
| Mm.233903 | 18111  | Nnat    | neuronatin                                | NM_180960.2    |
| Mm.423051 | 57741  | Noc2l   | nucleolar complex associated 2 homolog    | NM_021303.2    |
| Mm.28203  | 52530  | Nola2   | nucleolar protein family A, member 2      | NM_026631.3    |
| Mm.309520 | 217365 | Nploc4  | nuclear protein localization 4 homolog (l | NM_199469.1    |
| Mm.6343   | 18148  | Npm1    | nucleophosmin 1                           | NM_008722.2    |
| Mm.103477 | 230103 | Npr2    | natriuretic peptide receptor 2            | NM_173788.3    |
| Mm.5142   | 18164  | Nptx1   | neuronal pentraxin 1                      | NM_008730.2    |
| Mm.10099  | 53324  | Nptx2   | neuronal pentraxin 2                      | NM_016789.2    |
| Mm.3507   | 18227  | Nr4a2   | nuclear receptor subfamily 4, group A, r  | NM_013613.1    |
| Mm.312068 | 18189  | Nrxn1   | neurexin I                                | NM_020252.2    |
| Mm.329616 | 18190  | Nrxn2   | neurexin II                               | NM_020253.2    |
| Mm.3304   | 18197  | Nsg2    | neuron specific gene family member 2      | NM_008741.3    |
| Mm.325732 | 26425  | Nubp1   | nucleotide binding protein 1              | NM_011955.1    |
| Mm.7271   | 53319  | Nxf1    | nuclear RNA export factor 1 homolog (S    | NM_016813.2    |
| Mm.274285 | 74143  | Opa1    | optic atrophy 1 homolog (human)           | NM_133752.2    |
| Mm.296545 | 68767  | ORF19   | open reading frame 19                     | NM_026833.1    |
| Mm.391339 | 207375 | ORF34   | open reading frame 34                     | NM_198105.2    |
| Mm.61022  | 74309  | Osbp2   | oxysterol binding protein 2               | NM_152818.2    |
| Mm.44153  | 71720  | Osbpl3  | oxysterol binding protein-like 3          | NM_027881.2    |
| Mm.202257 | 218885 | Oxnad1  | oxidoreductase NAD-binding domain co      | NM_145460.1    |
| Mm.254267 | 170719 | Oxr1    | oxidation resistance 1                    | NM_130885.2    |
| Mm.16660  | 18453  | P4hb    | prolyl 4-hydroxylase, beta polypeptide    | NM_011032.2    |
| Mm.34650  | 18483  | Palm    | paralemmin                                | NM_023128.3    |
| Mm.151640 | 74450  | Pank2   | pantothenate kinase 2 (Hallervorden-Sp    | NM_153501.1    |
| Mm.242865 | 100715 | Papd4   | PAP associated domain containing 4        | NM_133905.2    |
| Mm.329076 | 78309  | Parc    | p53-associated parkin-like cytoplasmic g  | NM_001081335.1 |
| Mm.390957 | 18515  | Pbx2    | pre B-cell leukemia transcription factor  | NM_017463.2    |
| Mm.46016  | 76477  | Pcolce2 | procollagen C-endopeptidase enhancer      | NM_029620.2    |
| Mm.3401   | 18552  | Pcsk5   | proprotein convertase subtilisin/kexin t  | XM_990087.1    |

|           |        |          |                                          |                |
|-----------|--------|----------|------------------------------------------|----------------|
| Mm.371609 | 56330  | Pdcd5    | programmed cell death 5                  | NM_019746.3    |
| Mm.247564 | 207728 | Pde2a    | phosphodiesterase 2A, cGMP-stimulate     | NM_001008548.2 |
| Mm.4146   | 18596  | Pdgfrb   | platelet derived growth factor receptor  | NM_008809.1    |
| Mm.34775  | 18597  | Pdha1    | pyruvate dehydrogenase E1 alpha 1        | NM_008810.2    |
| Mm.171484 | 94184  | Pdxdc1   | pyridoxal-dependent decarboxylase dor    | NM_053181.2    |
| Mm.343951 | 18613  | Pecam1   | platelet/endothelial cell adhesion molec | NM_008816.2    |
| Mm.299399 | 224824 | Pex6     | peroxisomal biogenesis factor 6          | NM_145488.1    |
| Mm.336205 | 18655  | Pgk1     | phosphoglycerate kinase 1                | NM_008828.2    |
| Mm.9052   | 53328  | Pgrmc1   | progesterone receptor membrane comp      | NM_016783.3    |
| Mm.28864  | 74451  | Pgs1     | phosphatidylglycerophosphate synthase    | NM_133757.2    |
| Mm.16898  | 236539 | Phgdh    | 3-phosphoglycerate dehydrogenase         | NM_016966.3    |
| Mm.371997 | 236539 | Phgdh    | 3-phosphoglycerate dehydrogenase         | NM_016966.3    |
| Mm.34346  | 27280  | Phlda3   | pleckstrin homology-like domain, family  | NM_013750.1    |
| Mm.274830 | 75669  | Pik3r4   | phosphatidylinositol 3 kinase, regulator | NM_001081309.1 |
| Mm.18539  | 68943  | Pink1    | PTEN induced putative kinase 1           | NM_026880.2    |
| Mm.29836  | 18717  | Pip5k1c  | phosphatidylinositol-4-phosphate 5-kin   | NM_008844.1    |
| Mm.273204 | 18797  | Plcb3    | phospholipase C, beta 3                  | NM_008874.3    |
| Mm.6483   | 18807  | Pld3     | phospholipase D family, member 3         | NM_011116.1    |
| Mm.274158 | 69217  | Plekha4  | pleckstrin homology domain containing    | NM_148927.1    |
| Mm.3741   | 233765 | Plekha7  | pleckstrin homology domain containing    | NM_172743.2    |
| Mm.29475  | 67220  | Plekho1  | pleckstrin homology domain containing    | NM_023320.2    |
| Mm.1268   | 18823  | Plp1     | proteolipid protein (myelin) 1           | NM_011123.2    |
| Mm.3085   | 67784  | Plxnd1   | plexin D1                                | NM_026376.2    |
| Mm.301655 | 73078  | Pmpcb    | peptidase (mitochondrial processing) be  | NM_028431.2    |
| Mm.293761 | 140484 | Pofut1   | protein O-fucosyltransferase 1           | NM_080463.3    |
| Mm.35788  | 18972  | Pold2    | polymerase (DNA directed), delta 2, reg  | NM_008894.1    |
| Mm.197493 | 67811  | Poldip2  | polymerase (DNA-directed), delta intera  | NM_026389.3    |
| Mm.279781 | 67486  | Polr3g   | polymerase (RNA) III (DNA directed) pol  | NM_001081176.1 |
| Mm.196045 | 68273  | Pomgnt1  | protein O-linked mannose beta1,2-N-ac    | NM_029786.1    |
| Mm.332855 | 66537  | Pomp     | proteasome maturation protein            | NM_025624.2    |
| Mm.221181 | 18998  | Pou4f3   | POU domain, class 4, transcription facto | NM_138945.1    |
| Mm.250508 | 66812  | Ppcdc    | phosphopantothenoilcysteine decarbox     | NM_176831.4    |
| Mm.103382 | 67533  | Ppfbp1   | PTPRF interacting protein, binding prote | NM_026221.1    |
| Mm.74208  | 223828 | Pphln1   | periphilin 1                             | NM_175363.3    |
| Mm.40577  | 242083 | Ppm1l    | protein phosphatase 1 (formerly 2C)-lik  | NM_178726.3    |
| Mm.188709 | 329251 | Ppp1r12b | protein phosphatase 1, regulatory (inhib | NM_001081307.1 |
| Mm.140    | 18938  | Ppp1r14b | protein phosphatase 1, regulatory (inhib | NM_008889.2    |
| Mm.259626 | 26932  | Ppp2r5e  | protein phosphatase 2, regulatory subu   | NM_012024.2    |
| Mm.211211 | 74182  | Prei4    | preimplantation protein 4                | NM_028802.2    |
| Mm.30039  | 19084  | Prkar1a  | protein kinase, cAMP dependent regula    | NM_021880.2    |
| Mm.28561  | 18762  | Prkcz    | protein kinase C, zeta                   | NM_008860.2    |
| Mm.71     | 19090  | Prkdc    | protein kinase, DNA activated, catalytic | NM_011159.2    |
| Mm.358657 | 28000  | Prpf19   | PRP19/PSO4 pre-mRNA processing facto     | NM_134129.3    |
| Mm.30660  | 70052  | Prpf4    | PRP4 pre-mRNA processing factor 4 hon    | NM_027297.3    |
| Mm.2477   | 19132  | Prph     | peripherin                               | NM_013639.1    |
| Mm.44183  | 233895 | Prr14    | proline rich 14                          | NM_145589.2    |
| Mm.9431   | 19142  | Prss12   | protease, serine, 12 neurotrypsin (moto  | NM_008939.1    |
| Mm.5875   | 76560  | Prss8    | protease, serine, 8 (prostasin)          | NM_133351.2    |
| Mm.257354 | 77754  | Prune2   | prune homolog 2 (Drosophila)             | XM_987077.1    |
| Mm.105331 | 101739 | Psip1    | PC4 and SFRS1 interacting protein 1      | NM_133948.4    |
| Mm.208883 | 26442  | Psma5    | proteasome (prosome, macropain) subu     | NM_011967.3    |
| Mm.30210  | 26443  | Psma6    | proteasome (prosome, macropain) subu     | NM_011968.2    |
| Mm.21728  | 26444  | Psma7    | proteasome (prosome, macropain) subu     | NM_011969.1    |
| Mm.98     | 19175  | Psmb6    | proteasome (prosome, macropain) subu     | NM_008946.3    |
| Mm.280013 | 70247  | Psmd1    | proteasome (prosome, macropain) 26S      | NM_027357.2    |

|           |        |         |                                                |                |
|-----------|--------|---------|------------------------------------------------|----------------|
| Mm.273152 | 57296  | Psmid8  | proteasome (prosome, macropain) 26S            | NM_026545.2    |
| Mm.389499 | 56742  | Psrc1   | proline/serine-rich coiled-coil 1              | NM_019976.2    |
| Mm.193688 | 19244  | Ptp4a2  | protein tyrosine phosphatase 4a2               | NM_008974.3    |
| Mm.277916 | 19246  | Ptpn1   | protein tyrosine phosphatase, non-rece         | NM_011201.3    |
| Mm.258771 | 19280  | Ptprs   | protein tyrosine phosphatase, receptor         | NM_011218.1    |
| Mm.182563 | 76308  | Rab1b   | RAB1B, member RAS oncogene family              | NM_029576.3    |
| Mm.21936  | 216344 | Rab21   | RAB21, member RAS oncogene family              | NM_024454.1    |
| Mm.12815  | 19344  | Rab5b   | RAB5B, member RAS oncogene family              | NM_177411.3    |
| Mm.87216  | 56187  | Rabggta | Rab geranylgeranyl transferase, a subun        | NM_019519.1    |
| Mm.9286   | 19364  | Rad51l3 | RAD51-like 3 ( <i>S. cerevisiae</i> )          | NM_011235.3    |
| Mm.3272   | 51801  | Ramp1   | receptor (calcitonin) activity modifying g     | NM_016894.2    |
| Mm.270975 | 19387  | Rangap1 | RAN GTPase activating protein 1                | NM_011241.3    |
| Mm.298274 | 107746 | Rapgef1 | Rap guanine nucleotide exchange factor         | NM_054050.2    |
| Mm.28231  | 71660  | Rarres2 | retinoic acid receptor responder (tazaro       | NM_027852.2    |
| Mm.42150  | 19419  | Rasgrp1 | RAS guanyl releasing protein 1                 | NM_011246.2    |
| Mm.132868 | 213464 | Rbbp5   | retinoblastoma binding protein 5               | NM_172517.1    |
| Mm.4480   | 19647  | Rbbp6   | retinoblastoma binding protein 6               | NM_175023.2    |
| Mm.279194 | 236732 | Rbm10   | RNA binding motif protein 10                   | NM_145627.1    |
| Mm.28275  | 19655  | Rbmx    | RNA binding motif protein, X chromosom         | NM_011252.2    |
| Mm.4876   | 19672  | Rcn1    | reticulocalbin 1                               | NM_009037.2    |
| Mm.279907 | 27632  | Rdbp    | RD RNA-binding protein                         | NM_138580.2    |
| Mm.293588 | 225362 | Reep2   | receptor accessory protein 2                   | NM_144865.1    |
| Mm.249966 | 19697  | Rela    | v-rel reticuloendotheliosis viral oncogen      | NM_009045.4    |
| Mm.28840  | 19712  | Rest    | RE1-silencing transcription factor             | NM_011263.1    |
| Mm.260943 | 56210  | Rev1    | REV1 homolog ( <i>S. cerevisiae</i> )          | NM_019570.3    |
| Mm.1116   | 66932  | Rexo1   | REX1, RNA exonuclease 1 homolog ( <i>S. ce</i> | NM_025852.3    |
| Mm.148877 | 19687  | Rfc1    | replication factor C (activator 1) 1           | NM_011258.1    |
| Mm.196208 | 71729  | Rgs12   | regulator of G-protein signaling 12            | NM_173402.1    |
| Mm.44606  | 56533  | Rgs17   | regulator of G-protein signaling 17            | NM_019958.3    |
| Mm.100348 | 52882  | Rgs7bp  | regulator of G-protein signalling 7 bindir     | NM_029879.2    |
| Mm.396875 | 52882  | Rgs7bp  | regulator of G-protein signalling 7 bindir     | NM_029879.2    |
| Mm.687    | 11852  | Rhob    | ras homolog gene family, member B              | NM_007483.2    |
| Mm.57052  | 14787  | Rhpn1   | rhopilin, Rho GTPase binding protein 1         | NM_008164.1    |
| Mm.28551  | 66878  | Riok3   | RIO kinase 3 (yeast)                           | NM_024182.4    |
| Mm.4009   | 19769  | Rit1    | Ras-like without CAAX 1                        | NM_009069.3    |
| Mm.288183 | 66089  | Rmnd5b  | required for meiotic nuclear division 5 h      | NM_025346.1    |
| Mm.228903 | 56736  | Rnf14   | ring finger protein 14                         | NM_020012.1    |
| Mm.249986 | 108660 | Rnf187  | ring finger protein 187                        | XM_992215.1    |
| Mm.388529 | 80751  | Rnf34   | ring finger protein 34                         | NM_030564.1    |
| Mm.262859 | 73469  | Rnf38   | ring finger protein 38                         | NM_175201.4    |
| Mm.294120 | 67588  | Rnf41   | ring finger protein 41                         | NM_026259.2    |
| Mm.214569 | 56698  | Rnuxa   | RNA U, small nuclear RNA export adapto         | NM_019996.3    |
| Mm.27792  | 66049  | Rogdi   | rogdi homolog ( <i>Drosophila</i> )            | NM_133185.2    |
| Mm.247556 | 19893  | Rpgr    | retinitis pigmentosa GTPase regulator          | NM_011285.1    |
| Mm.307846 | 19934  | Rpl22   | ribosomal protein L22                          | NM_009079.2    |
| Mm.22723  | 268449 | Rpl23a  | ribosomal protein L23a                         | NM_207523.1    |
| Mm.304790 | 268449 | Rpl23a  | ribosomal protein L23a                         | NM_207523.1    |
| Mm.188544 | 103963 | Rpn1    | ribophorin I                                   | NM_133933.3    |
| Mm.391885 | 75617  | Rps25   | ribosomal protein S25                          | NM_024266.3    |
| Mm.379006 | 20090  | Rps29   | ribosomal protein S29                          | NM_009093.1    |
| Mm.4071   | 16785  | Rpsa    | ribosomal protein SA                           | NM_011029.3    |
| Mm.13705  | 81910  | Rrbp1   | ribosome binding protein 1                     | NM_133626.2    |
| Mm.288606 | 106298 | Rrn3    | RRN3 RNA polymerase I transcription fa         | NM_001039521.1 |
| Mm.131949 | 212892 | Rshl3   | radial spokehead-like 3                        | XM_993152.1    |
| Mm.192580 | 68585  | Rtn4    | reticulon 4                                    | NM_194054.2    |

|           |        |          |                                               |                |
|-----------|--------|----------|-----------------------------------------------|----------------|
| Mm.82661  | 237847 | Rtn4rl1  | reticulon 4 receptor-like 1                   | NM_177708.5    |
| Mm.3925   | 20198  | S100a4   | S100 calcium binding protein A4               | NM_011311.1    |
| Mm.100144 | 20200  | S100a6   | S100 calcium binding protein A6 (calyc        | NM_011313.2    |
| Mm.303924 | 66406  | Sac3d1   | SAC3 domain containing 1                      | NM_133678.3    |
| Mm.255066 | 224903 | Safb     | scaffold attachment factor B                  | XM_974286.1    |
| Mm.297199 | 217125 | Samd14   | sterile alpha motif domain containing 14      | NM_146025.2    |
| Mm.34562  | 20227  | Sart1    | squamous cell carcinoma antigen recog         | NM_016882.3    |
| Mm.29594  | 53890  | Sart3    | squamous cell carcinoma antigen recog         | NM_016926.1    |
| Mm.35483  | 77980  | Sbf1     | SET binding factor 1                          | NM_001081030.1 |
| Mm.201455 | 107767 | Scamp1   | secretory carrier membrane protein 1          | NM_029153.1    |
| Mm.83840  | 71145  | Scara5   | scavenger receptor class A, member 5 (r       | NM_028903.1    |
| Mm.193096 | 20249  | Scd1     | stearoyl-Coenzyme A desaturase 1              | NM_009127.3    |
| Mm.267377 | 20249  | Scd1     | stearoyl-Coenzyme A desaturase 1              | NM_009127.3    |
| Mm.247042 | 20264  | Scn10a   | sodium channel, voltage-gated, type X, s      | NM_009134.2    |
| Mm.89981  | 24046  | Scn11a   | sodium channel, voltage-gated, type XI,       | NM_011887.3    |
| Mm.103584 | 20271  | Scn5a    | sodium channel, voltage-gated, type V, s      | NM_021544.3    |
| Mm.389273 | 20272  | Scn7a    | sodium channel, voltage-gated, type VII,      | NM_009135.1    |
| Mm.41557  | 69938  | Scrn1    | secernin 1                                    | NM_027268.2    |
| Mm.247457 | 74616  | Scrn3    | secernin 3                                    | NM_029022.1    |
| Mm.206536 | 20970  | Sdc3     | syndecan 3                                    | NM_011520.3    |
| Mm.253771 | 68112  | Sdccag3  | serologically defined colon cancer antig      | NM_026563.3    |
| Mm.246965 | 67680  | Sdhb     | succinate dehydrogenase complex, subu         | NM_023374.3    |
| Mm.173119 | 218811 | Sec24c   | SEC24 related gene family, member C (S        | NM_172596.1    |
| Mm.250605 | 20338  | Sel1l    | sel-1 suppressor of lin-12-like (C. elegan    | NM_011344.2    |
| Mm.29812  | 93684  | Sep15    | selenoprotein                                 | NM_053102.2    |
| Mm.274399 | 20362  | Sep8     | septin 8                                      | NM_033144.1    |
| Mm.38450  | 53860  | Sep9     | septin 9                                      | NM_017380.1    |
| Mm.34329  | 109079 | Sephs1   | selenophosphate synthetase 1                  | NM_175400.5    |
| Mm.218473 | 26943  | Serinc3  | serine incorporator 3                         | NM_012032.3    |
| Mm.2044   | 20317  | Serpinf1 | serine (or cysteine) peptidase inhibitor,     | NM_011340.3    |
| Mm.339676 | 58172  | Sertad2  | SERTA domain containing 2                     | NM_021372.2    |
| Mm.200120 | 170742 | Sertad3  | SERTA domain containing 3                     | NM_133210.2    |
| Mm.250391 | 208043 | Setd1b   | SET domain containing 1B                      | XR_005169.1    |
| Mm.192111 | 73251  | Setd7    | SET domain containing (lysine methyltra       | NM_080793.5    |
| Mm.284505 | 234373 | Sfrs14   | splicing factor, arginine/serine-rich 14      | NM_172755.2    |
| Mm.21841  | 20382  | Sfrs2    | splicing factor, arginine/serine-rich 2 (S    | NM_011358.1    |
| Mm.292016 | 225027 | Sfrs7    | splicing factor, arginine/serine-rich 7       | NM_146083.1    |
| Mm.31537  | 67158  | Sft2d3   | SFT2 domain containing 3                      | XM_983884.1    |
| Mm.30068  | 52551  | Sgta     | small glutamine-rich tetratricopeptide r      | NM_024499.1    |
| Mm.22240  | 73723  | Sh3bgrl3 | SH3 domain binding glutamic acid-rich p       | NM_080559.1    |
| Mm.33343  | 227700 | Sh3glb2  | SH3-domain GRB2-like endophilin B2            | NM_139302.1    |
| Mm.262320 | 225608 | Sh3tc2   | SH3 domain and tetratricopeptide repea        | NM_172628.2    |
| Mm.35325  | 68346  | Sirt5    | sirtuin 5 (silent mating type informatio      | NM_178848.3    |
| Mm.291029 | 72198  | Skiv2l2  | superkiller viralicidic activity 2-like 2 (S. | NM_028151.2    |
| Mm.33832  | 108052 | Slc14a1  | solute carrier family 14 (urea transporte     | NM_028122.3    |
| Mm.28632  | 80879  | Slc16a3  | solute carrier family 16 (monocarboxylic      | NM_030696.3    |
| Mm.19325  | 66859  | Slc16a9  | solute carrier family 16 (monocarboxylic      | NM_025807.3    |
| Mm.1056   | 20514  | Slc1a5   | solute carrier family 1 (neutral amino ac     | NM_009201.2    |
| Mm.288697 | 74011  | Slc25a27 | solute carrier family 25, member 27           | NM_028711.3    |
| Mm.30087  | 14385  | Slc37a4  | solute carrier family 37 (glucose-6-phos      | NM_008063.2    |
| Mm.212813 | 106068 | Slc45a4  | solute carrier family 45, member 4            | NM_001033219.2 |
| Mm.142455 | 20540  | Slc7a7   | solute carrier family 7 (cationic amino a     | NM_011405.3    |
| Mm.21587  | 65962  | Slc9a3r2 | solute carrier family 9 (sodium/hydroge       | NM_023449.2    |
| Mm.391941 | 20874  | Slk      | STE20-like kinase (yeast)                     | NM_009289.2    |
| Mm.272920 | 17129  | Smad5    | MAD homolog 5 (Drosophila)                    | NM_008541.2    |



|           |        |          |                                           |                |
|-----------|--------|----------|-------------------------------------------|----------------|
| Mm.286593 | 20586  | Smarca4  | SWI/SNF related, matrix associated, acti  | NM_011417.2    |
| Mm.274232 | 54380  | Smarcal1 | Swi/SNF related matrix associated, actin  | NM_018817.1    |
| Mm.26412  | 24061  | Smc1a    | structural maintenance of chromosome      | NM_019710.1    |
| Mm.4628   | 20597  | Smpd1    | sphingomyelin phosphodiesterase 1, ac     | NM_011421.1    |
| Mm.27735  | 75788  | Smurf1   | SMAD specific E3 ubiquitin protein ligas  | NM_029438.3    |
| Mm.24082  | 330959 | Snpc5    | small nuclear RNA activating complex, p   | NM_183316.2    |
| Mm.282800 | 20618  | Sncg     | synuclein, gamma                          | NM_011430.2    |
| Mm.1541   | 20648  | Snta1    | syntrophin, acidic 1                      | NM_009228.1    |
| Mm.271891 | 56440  | Snx1     | sorting nexin 1                           | NM_019727.2    |
| Mm.28160  | 76742  | Snx27    | sorting nexin family member 27            | NM_029721.1    |
| Mm.273379 | 69178  | Snx5     | sorting nexin 5                           | NM_024225.4    |
| Mm.130    | 12703  | Socs1    | suppressor of cytokine signaling 1        | NM_009896.2    |
| Mm.5068   | 20410  | Sorbs3   | sorbin and SH3 domain containing 3        | NM_011366.2    |
| Mm.43375  | 66042  | Sostdc1  | sclerostin domain containing 1            | NM_025312.2    |
| Mm.252722 | 70997  | Spef1    | sperm flagellar 1                         | NM_027641.2    |
| Mm.299906 | 56381  | Spen     | SPEN homolog, transcriptional regulator   | NM_019763.2    |
| Mm.24222  | 56632  | Sphk2    | sphingosine kinase 2                      | NM_203280.2    |
| Mm.204969 | 20740  | Spna2    | spectrin alpha 2                          | NM_001076554.1 |
| Mm.123110 | 20742  | Spnb2    | spectrin beta 2                           | NM_175836.2    |
| Mm.42038  | 24066  | Spry4    | sprouty homolog 4 (Drosophila)            | NM_011898.2    |
| Mm.261906 | 14794  | Spsb2    | splA/ryanodine receptor domain and SC     | NM_013539.1    |
| Mm.274794 | 79043  | Spsb3    | splA/ryanodine receptor domain and SC     | NM_027141.1    |
| Mm.363404 | 20813  | Srp14    | signal recognition particle 14            | NM_009273.4    |
| Mm.5222   | 75956  | Srrm2    | serine/arginine repetitive matrix 2       | NM_175229.3    |
| Mm.180337 | 70356  | St13     | suppression of tumorigenicity 13          | NM_133726.2    |
| Mm.130952 | 76630  | Stambpl1 | Stam binding protein like 1               | NM_029682.4    |
| Mm.249934 | 20848  | Stat3    | signal transducer and activator of transd | NM_213660.2    |
| Mm.34064  | 20851  | Stat5b   | signal transducer and activator of transd | NM_011489.2    |
| Mm.645    | 20866  | Stim1    | stromal interaction molecule 1            | NM_009287.4    |
| Mm.8235   | 20868  | Stk10    | serine/threonine kinase 10                | NM_009288.2    |
| Mm.17461  | 20872  | Stk16    | serine/threonine kinase 16                | NM_011494.3    |
| Mm.65336  | 57740  | Stk32c   | serine/threonine kinase 32C               | NM_021302.2    |
| Mm.391038 | 268980 | Strn     | striatin, calmodulin binding protein      | NM_011500.2    |
| Mm.21612  | 97387  | Strn4    | striatin, calmodulin binding protein 4    | NM_133789.2    |
| Mm.285400 | 217517 | Stxbp6   | syntaxin binding protein 6 (amisyn)       | NM_144552.3    |
| Mm.24433  | 20610  | Sumo3    | SMT3 suppressor of mif two 3 homolog      | NM_019929.3    |
| Mm.245577 | 20935  | Surf6    | surfeit gene 6                            | NM_009298.3    |
| Mm.247956 | 71733  | Susd2    | sushi domain containing 2                 | NM_027890.4    |
| Mm.278578 | 225888 | Suv420h1 | suppressor of variegation 4-20 homolog    | NM_144871.3    |
| Mm.130902 | 68188  | Sympk    | symplekin                                 | XM_984493.1    |
| Mm.260545 | 56403  | Syncrip  | synaptotagmin binding, cytoplasmic RN     | NM_019796.4    |
| Mm.230301 | 20972  | Syng1    | synaptogyrin 1                            | NM_207708.1    |
| Mm.340436 | 216965 | Taok1    | TAO kinase 1                              | NM_144825.2    |
| Mm.391153 | 209478 | Tbc1d12  | TBC1D12: TBC1 domain family, member       | NM_145952.3    |
| Mm.34580  | 56480  | Tbk1     | TANK-binding kinase 1                     | NM_019786.3    |
| Mm.273210 | 83383  | Tcfap4   | transcription factor AP4                  | NM_031182.2    |
| Mm.24670  | 102791 | Tcta     | T-cell leukemia translocation altered ge  | NM_133986.1    |
| Mm.391476 | 21766  | Tex261   | testis expressed gene 261                 | NM_009357.1    |
| Mm.26688  | 21826  | Thbs2    | thrombospondin 2                          | NM_011581.1    |
| Mm.320644 | 330267 | Thsd7a   | thrombospondin, type I, domain contain    | XM_992003.1    |
| Mm.3951   | 21838  | Thy1     | thymus cell antigen 1, theta              | NM_009382.3    |
| Mm.206505 | 21858  | Timp2    | tissue inhibitor of metalloproteinase 2   | NM_011594.3    |
| Mm.4871   | 21859  | Timp3    | tissue inhibitor of metalloproteinase 3   | NM_011595.2    |
| Mm.23987  | 117149 | Tirap    | toll-interleukin 1 receptor (TIR) domain  | NM_054096.1    |
| Mm.4342   | 21872  | Tjp1     | tight junction protein 1                  | NM_009386.1    |

|           |        |          |                                           |                |
|-----------|--------|----------|-------------------------------------------|----------------|
| Mm.104744 | 21873  | Tjp2     | tight junction protein 2                  | NM_011597.2    |
| Mm.24255  | 21887  | Tle3     | transducin-like enhancer of split 3, hom  | NM_009389.2    |
| Mm.136511 | 228012 | Tlk1     | tousled-like kinase 1                     | NM_172664.2    |
| Mm.28626  | 69742  | Tm2d2    | TM2 domain containing 2                   | NM_027194.2    |
| Mm.379159 | 68581  | Tmed10   | transmembrane emp24-like trafficking d    | NM_026775.4    |
| Mm.313244 | 69195  | Tmem121  | transmembrane protein 121                 | NM_153776.2    |
| Mm.341593 | 270893 | Tmem132e | transmembrane protein 132E                | NM_023438.2    |
| Mm.271147 | 51875  | Tmem141  | transmembrane protein 141                 | NM_001040130.2 |
| Mm.8569   | 72309  | Tmem158  | transmembrane protein 158                 | NM_001002267.2 |
| Mm.260360 | 382014 | Tmem16h  | transmembrane protein 16H                 | XM_980783.1    |
| Mm.43212  | 233724 | Tmem41b  | transmembrane protein 41B                 | NM_153525.5    |
| Mm.157904 | 224807 | Tmem63b  | transmembrane protein 63b                 | NM_198167.2    |
| Mm.290353 | 67887  | Tmem66   | transmembrane protein 66                  | NM_026432.2    |
| Mm.194225 | 70397  | Tmem70   | transmembrane protein 70                  | NM_027415.2    |
| Mm.34256  | 71913  | Tmem79   | transmembrane protein 79                  | NM_024246.5    |
| Mm.159684 | 21917  | Tmpo     | thymopoietin                              | NM_011605.2    |
| Mm.1258   | 21937  | Tnfrsf1a | tumor necrosis factor receptor superfam   | NM_011609.3    |
| Mm.200792 | 94185  | Tnfrsf21 | tumor necrosis factor receptor superfam   | NM_178589.3    |
| Mm.130362 | 21974  | Top2b    | topoisomerase (DNA) II beta               | NM_009409.2    |
| Mm.259893 | 235559 | Topbp1   | topoisomerase (DNA) II beta binding pro   | NM_176979.5    |
| Mm.87051  | 252838 | Tox      | thymocyte selection-associated HMG bd     | NM_145711.3    |
| Mm.121878 | 22003  | Tpm1     | tropomyosin 1, alpha                      | NM_024427.4    |
| Mm.261259 | 215243 | Traf3ip3 | TRAF3 interacting protein 3               | NM_153137.3    |
| Mm.273277 | 72169  | Trim29   | tripartite motif protein 29               | NM_023655.1    |
| Mm.43871  | 66854  | Trim35   | tripartite motif-containing 35            | NM_029979.3    |
| Mm.422769 | 330863 | Trim67   | tripartite motif-containing 67            | XM_620720.3    |
| Mm.209265 | 14897  | Trip12   | thyroid hormone receptor interactor 12    | NM_133975.4    |
| Mm.3597   | 56191  | Tro      | trophinin                                 | NM_019548.3    |
| Mm.258404 | 72133  | Trub1    | TruB pseudouridine (psi) synthase homd    | NM_029839.2    |
| Mm.30435  | 22084  | Tsc2     | tuberous sclerosis 2                      | NM_011647.2    |
| Mm.102136 | 110796 | Tshz1    | teashirt zinc finger family member 1      | NM_001081300.1 |
| Mm.35650  | 67125  | Tspan31  | tetraspanin 31                            | NM_025982.3    |
| Mm.20445  | 22110  | Tspyl1   | testis-specific protein, Y-encoded-like 1 | NM_009433.2    |
| Mm.15312  | 22117  | Tst      | thiosulfate sulfurtransferase, mitochond  | NM_009437.4    |
| Mm.244512 | 66736  | Ttc35    | tetratricopeptide repeat domain 35        | NM_025736.2    |
| Mm.389883 | 73032  | Ttc9b    | tetratricopeptide repeat domain 9B        | NM_028417.1    |
| Mm.235007 | 319953 | Ttl1     | tubulin tyrosine ligase-like 1            | NM_178869.3    |
| Mm.132172 | 320244 | Ttl5     | tubulin tyrosine ligase-like family, mem  | NM_001081423.1 |
| Mm.373672 | 22138  | Ttn      | titin                                     | NM_028004.2    |
| Mm.29729  | 57776  | Ttyh1    | tweety homolog 1 (Drosophila)             | NM_021324.4    |
| Mm.379227 | 73710  | Tubb2b   | tubulin, beta 2b                          | NM_023716.2    |
| Mm.227260 | 227613 | Tubb2c   | tubulin, beta 2c                          | NM_146116.1    |
| Mm.27670  | 52700  | Txn15    | thioredoxin-like 5                        | NM_026559.3    |
| Mm.68819  | 72565  | Uaca     | uveal autoantigen with coiled-coil doma   | NM_028283.2    |
| Mm.180052 | 56550  | Ube2d2   | ubiquitin-conjugating enzyme E2D 2        | NM_019912.1    |
| Mm.337238 | 67921  | Ube2f    | ubiquitin-conjugating enzyme E2F (puta    | NM_026454.3    |
| Mm.196580 | 22192  | Ube2m    | ubiquitin-conjugating enzyme E2M (UBC     | NM_145578.1    |
| Mm.360108 | 66589  | Ube2v1   | ubiquitin-conjugating enzyme E2 varian    | NM_023230.2    |
| Mm.38802  | 268470 | Ube2z    | ubiquitin-conjugating enzyme E2Z (puta    | NM_172300.3    |
| Mm.284811 | 22248  | Unc119   | unc-119 homolog (C. elegans)              | NM_011676.2    |
| Mm.27404  | 67387  | Unc50    | unc-50 homolog (C. elegans)               | NM_026123.3    |
| Mm.44858  | 67031  | Upf3a    | UPF3 regulator of nonsense transcripts    | NM_025924.2    |
| Mm.322453 | 22282  | Usf2     | upstream transcription factor 2           | NM_011680.1    |
| Mm.346654 | 74270  | Usp20    | ubiquitin specific peptidase 20           | NM_028846.3    |
| Mm.258320 | 170822 | Usp33    | ubiquitin specific peptidase 33           | NM_133247.2    |

|           |        |            |                                          |                |
|-----------|--------|------------|------------------------------------------|----------------|
| Mm.331784 | 22288  | Utrn       | utrophin                                 | NM_011682.4    |
| Mm.349358 | 113848 | V1ra6      | vomeronal 1 receptor, A6                 | NM_053221.1    |
| Mm.1838   | 22320  | Vamp8      | vesicle-associated membrane protein 8    | NM_016794.2    |
| Mm.28420  | 22321  | Vars       | valyl-tRNA synthetase                    | NM_011690.2    |
| Mm.379457 | 269523 | Vcp        | valosin containing protein               | NM_009503.3    |
| Mm.268000 | 22352  | Vim        | vimentin                                 | NM_011701.3    |
| Mm.292983 | 74199  | Vit        | vitrin                                   | NM_028813.1    |
| Mm.19091  | 107305 | Vps37c     | vacuolar protein sorting 37C (yeast)     | NM_181403.2    |
| Mm.1574   | 73178  | Wasl       | Wiskott-Aldrich syndrome-like (human)    | NM_028459.1    |
| Mm.2437   | 57315  | Wdr46      | WD repeat domain 46                      | NM_020603.2    |
| Mm.5110   | 70465  | Wdr77      | WD repeat domain 77                      | NM_027432.3    |
| Mm.332320 | 24116  | Whsc2      | Wolf-Hirschhorn syndrome candidate 2     | NM_011914.2    |
| Mm.223504 | 215280 | Wipf1      | WAS/WASL interacting protein family, n   | NM_153138.3    |
| Mm.374909 | 330319 | Wipf3      | WAS/WASL interacting protein family, n   | XM_620310.3    |
| Mm.274948 | 22404  | Wiz        | widely-interspaced zinc finger motifs    | NM_212438.1    |
| Mm.255063 | 71446  | Wrb        | tryptophan rich basic protein            | NM_207301.2    |
| Mm.348649 | 74254  | Xab1       | XPA binding protein 1                    | NM_133756.4    |
| Mm.275039 | 72322  | Xpo5       | exportin 5                               | NM_028198.1    |
| Mm.25042  | 73192  | Xpot       | exportin, tRNA (nuclear export receptor) | NM_001081056.1 |
| Mm.4347   | 22594  | Xrcc1      | X-ray repair complementing defective re  | NM_009532.3    |
| Mm.221992 | 22601  | Yap1       | yes-associated protein 1                 | NM_009534.2    |
| Mm.212290 | 77929  | Yipf6      | Yip1 domain family, member 6             | NM_207633.2    |
| Mm.23335  | 27377  | Yme11      | YME1-like 1 (S. cerevisiae)              | NM_013771.4    |
| Mm.59978  | 241525 | Ypel4      | yippee-like 4 (Drosophila)               | NM_001005342.2 |
| Mm.30205  | 228994 | Ythdf1     | YTH domain family 1                      | NM_173761.3    |
| Mm.3360   | 22631  | Ywhaz      | tyrosine 3-monooxygenase/tryptophan      | NM_011740.2    |
| Mm.279272 | 232879 | ZBTB45     | zinc finger and BTB domain containing 4  | NM_001024699.1 |
| Mm.233082 | 214290 | Zcchc6     | zinc finger, CCHC domain containing 6    | NM_153538.2    |
| Mm.261606 | 72881  | Zdhhc4     | zinc finger, DHHC domain containing 4    | NM_028379.3    |
| Mm.220972 | 21769  | Zfand3     | zinc finger, AN1-type domain 3           | NM_148926.2    |
| Mm.38195  | 71591  | Zfp251     | zinc finger protein 251                  | NM_001007568.2 |
| Mm.107441 | 22688  | Zfp26      | zinc finger protein 26                   | NM_011753.2    |
| Mm.276296 | 77652  | Zfp422-rs1 | zinc finger protein 422, related sequenc | NM_029952.2    |
| Mm.286296 | 668501 | zfp507     | zinc finger protein 507                  | XM_145521.9    |
| Mm.26594  | 240442 | Zfp508     | zinc finger protein 508                  | XM_989242.1    |
| Mm.200818 | 69752  | Zfp511     | zinc finger protein 511                  | XM_991507.1    |
| Mm.296100 | 22710  | Zfp52      | zinc finger protein 52                   | NM_144515.2    |
| Mm.361832 | 619331 | Zfp551     | zinc fingr protein 551                   | NM_001033820.2 |
| Mm.294295 | 69020  | Zfp707     | zinc finger protein 707                  | NM_001081065.1 |
| Mm.381553 | 72306  | Zfp777     | zinc finger protein 777                  | NM_001081382.1 |
| Mm.389873 | 338354 | Zfp780b    | zinc finger protein 780B                 | NM_001081021.1 |
| Mm.113388 | 231125 | Zfyve28    | zinc finger, FYVE domain containing 28   | NM_001015039.1 |
| Mm.121274 | 320158 | Zmat4      | zinc finger, matrin type 4               | NM_177086.2    |
| Mm.1144   | 52915  | Zmiz2      | zinc finger, MIZ-type containing 2       | NM_028601.2    |
| Mm.23458  | 56364  | Zmym3      | zinc finger, MYM-type 3                  | NM_019831.2    |
| Mm.188422 | 99334  | Zscan29    | zinc finger SCAN domains 29              | XM_982762.1    |
| Mm.100116 | 80292  | Zxdc       | ZXD family zinc finger C                 | NM_173002.2    |
| Mm.101524 |        |            |                                          |                |
| Mm.117413 |        |            |                                          |                |
| Mm.119584 |        |            |                                          |                |
| Mm.124313 |        |            |                                          |                |
| Mm.14644  |        |            |                                          |                |
| Mm.196508 |        |            |                                          |                |
| Mm.197450 |        |            |                                          |                |
| Mm.210554 |        |            |                                          |                |

|           |  |  |  |  |
|-----------|--|--|--|--|
| Mm.2115   |  |  |  |  |
| Mm.22699  |  |  |  |  |
| Mm.235103 |  |  |  |  |
| Mm.235240 |  |  |  |  |
| Mm.241121 |  |  |  |  |
| Mm.242459 |  |  |  |  |
| Mm.248254 |  |  |  |  |
| Mm.249236 |  |  |  |  |
| Mm.252497 |  |  |  |  |
| Mm.255075 |  |  |  |  |
| Mm.255909 |  |  |  |  |
| Mm.256588 |  |  |  |  |
| Mm.260474 |  |  |  |  |
| Mm.266191 |  |  |  |  |
| Mm.267521 |  |  |  |  |
| Mm.275845 |  |  |  |  |
| Mm.278432 |  |  |  |  |
| Mm.28552  |  |  |  |  |
| Mm.288924 |  |  |  |  |
| Mm.290645 |  |  |  |  |
| Mm.291555 |  |  |  |  |
| Mm.296610 |  |  |  |  |
| Mm.306805 |  |  |  |  |
| Mm.307906 |  |  |  |  |
| Mm.310704 |  |  |  |  |
| Mm.316213 |  |  |  |  |
| Mm.32595  |  |  |  |  |
| Mm.335551 |  |  |  |  |
| Mm.335752 |  |  |  |  |
| Mm.337558 |  |  |  |  |
| Mm.339905 |  |  |  |  |
| Mm.340968 |  |  |  |  |
| Mm.34281  |  |  |  |  |
| Mm.347359 |  |  |  |  |
| Mm.347406 |  |  |  |  |
| Mm.347546 |  |  |  |  |
| Mm.347625 |  |  |  |  |
| Mm.358634 |  |  |  |  |
| Mm.363736 |  |  |  |  |
| Mm.365513 |  |  |  |  |
| Mm.366385 |  |  |  |  |
| Mm.368153 |  |  |  |  |
| Mm.379187 |  |  |  |  |
| Mm.379620 |  |  |  |  |
| Mm.379634 |  |  |  |  |
| Mm.380260 |  |  |  |  |
| Mm.380678 |  |  |  |  |
| Mm.386284 |  |  |  |  |
| Mm.387024 |  |  |  |  |
| Mm.389147 |  |  |  |  |
| Mm.389669 |  |  |  |  |
| Mm.389685 |  |  |  |  |
| Mm.389900 |  |  |  |  |
| Mm.390074 |  |  |  |  |
| Mm.390080 |  |  |  |  |

|           |  |  |  |  |
|-----------|--|--|--|--|
| Mm.390517 |  |  |  |  |
| Mm.390614 |  |  |  |  |
| Mm.391069 |  |  |  |  |
| Mm.391165 |  |  |  |  |
| Mm.391173 |  |  |  |  |
| Mm.391585 |  |  |  |  |
| Mm.391668 |  |  |  |  |
| Mm.391693 |  |  |  |  |
| Mm.391711 |  |  |  |  |
| Mm.391724 |  |  |  |  |
| Mm.391738 |  |  |  |  |
| Mm.391817 |  |  |  |  |
| Mm.391951 |  |  |  |  |
| Mm.391976 |  |  |  |  |
| Mm.391982 |  |  |  |  |
| Mm.392128 |  |  |  |  |
| Mm.392254 |  |  |  |  |
| Mm.392311 |  |  |  |  |
| Mm.392488 |  |  |  |  |
| Mm.392664 |  |  |  |  |
| Mm.393317 |  |  |  |  |
| Mm.393451 |  |  |  |  |
| Mm.393603 |  |  |  |  |
| Mm.393958 |  |  |  |  |
| Mm.394206 |  |  |  |  |
| Mm.394298 |  |  |  |  |
| Mm.394956 |  |  |  |  |
| Mm.395008 |  |  |  |  |
| Mm.396144 |  |  |  |  |
| Mm.396370 |  |  |  |  |
| Mm.396463 |  |  |  |  |
| Mm.396475 |  |  |  |  |
| Mm.396476 |  |  |  |  |
| Mm.396495 |  |  |  |  |
| Mm.396513 |  |  |  |  |
| Mm.396865 |  |  |  |  |
| Mm.397148 |  |  |  |  |
| Mm.397518 |  |  |  |  |
| Mm.397773 |  |  |  |  |
| Mm.397965 |  |  |  |  |
| Mm.398032 |  |  |  |  |
| Mm.398239 |  |  |  |  |
| Mm.399050 |  |  |  |  |
| Mm.399286 |  |  |  |  |
| Mm.399473 |  |  |  |  |
| Mm.399793 |  |  |  |  |
| Mm.400058 |  |  |  |  |
| Mm.400215 |  |  |  |  |
| Mm.400737 |  |  |  |  |
| Mm.400749 |  |  |  |  |
| Mm.401157 |  |  |  |  |
| Mm.401233 |  |  |  |  |
| Mm.401307 |  |  |  |  |
| Mm.401465 |  |  |  |  |
| Mm.401804 |  |  |  |  |



|           |  |  |  |  |
|-----------|--|--|--|--|
| Mm.402278 |  |  |  |  |
| Mm.402398 |  |  |  |  |
| Mm.402779 |  |  |  |  |
| Mm.402801 |  |  |  |  |
| Mm.403190 |  |  |  |  |
| Mm.403244 |  |  |  |  |
| Mm.403442 |  |  |  |  |
| Mm.404724 |  |  |  |  |
| Mm.405468 |  |  |  |  |
| Mm.405651 |  |  |  |  |
| Mm.406833 |  |  |  |  |
| Mm.407266 |  |  |  |  |
| Mm.407322 |  |  |  |  |
| Mm.407388 |  |  |  |  |
| Mm.407439 |  |  |  |  |
| Mm.407458 |  |  |  |  |
| Mm.407867 |  |  |  |  |
| Mm.408205 |  |  |  |  |
| Mm.408935 |  |  |  |  |
| Mm.409170 |  |  |  |  |
| Mm.410179 |  |  |  |  |
| Mm.410378 |  |  |  |  |
| Mm.411239 |  |  |  |  |
| Mm.411269 |  |  |  |  |
| Mm.411320 |  |  |  |  |
| Mm.411327 |  |  |  |  |
| Mm.412067 |  |  |  |  |
| Mm.412146 |  |  |  |  |
| Mm.412348 |  |  |  |  |
| Mm.413560 |  |  |  |  |
| Mm.413759 |  |  |  |  |
| Mm.413806 |  |  |  |  |
| Mm.414028 |  |  |  |  |
| Mm.415231 |  |  |  |  |
| Mm.415245 |  |  |  |  |
| Mm.416071 |  |  |  |  |
| Mm.416262 |  |  |  |  |
| Mm.416365 |  |  |  |  |
| Mm.416557 |  |  |  |  |
| Mm.417010 |  |  |  |  |
| Mm.417021 |  |  |  |  |
| Mm.417316 |  |  |  |  |
| Mm.417884 |  |  |  |  |
| Mm.418398 |  |  |  |  |
| Mm.418499 |  |  |  |  |
| Mm.418517 |  |  |  |  |
| Mm.418770 |  |  |  |  |
| Mm.418800 |  |  |  |  |
| Mm.418930 |  |  |  |  |
| Mm.419022 |  |  |  |  |
| Mm.419476 |  |  |  |  |
| Mm.420129 |  |  |  |  |
| Mm.420897 |  |  |  |  |
| Mm.421238 |  |  |  |  |
| Mm.421284 |  |  |  |  |

|           |  |  |  |  |
|-----------|--|--|--|--|
| Mm.421738 |  |  |  |  |
| Mm.421880 |  |  |  |  |
| Mm.422061 |  |  |  |  |
| Mm.422171 |  |  |  |  |
| Mm.422602 |  |  |  |  |
| Mm.422605 |  |  |  |  |
| Mm.422614 |  |  |  |  |
| Mm.422678 |  |  |  |  |
| Mm.422784 |  |  |  |  |
| Mm.422791 |  |  |  |  |
| Mm.422795 |  |  |  |  |
| Mm.422829 |  |  |  |  |
| Mm.422888 |  |  |  |  |
| Mm.422896 |  |  |  |  |
| Mm.422968 |  |  |  |  |
| Mm.424048 |  |  |  |  |
| Mm.424338 |  |  |  |  |
| Mm.424951 |  |  |  |  |
| Mm.49752  |  |  |  |  |
| Mm.5104   |  |  |  |  |
| Mm.56337  |  |  |  |  |
| Mm.56935  |  |  |  |  |
| Mm.87456  |  |  |  |  |
| Mm.8763   |  |  |  |  |
