# Supplementary material
Source: PubMed Central journal article supplement (PMC3003944)
Supplement: NIHMS229912-supplement-04.pdf [file NIHMS229912-supplement-04.pdf]

| Probe       | Gene Symbol         | Gene Title                                   | DRG      | Cereb.   | Fold Change | BH p-value |
|-------------|---------------------|----------------------------------------------|----------|----------|-------------|------------|
| 102704_at   | Aqp4                | aquaporin 4                                  | 47.98    | 1185.84  | -24.72      | 7.70E-08   |
| 161329_f_at | Capzb               | capping protein (actin filament) r           | 13171.94 | 951.63   | 13.84       | 4.34E-07   |
| 102703_s_at | Aqp4                | aquaporin 4                                  | 62.75    | 504.45   | -8.04       | 6.23E-07   |
| 100332_s_at | LOC677654 /// Prdx6 | peroxiredoxin 6 /// peroxiredoxin            | 53.18    | 332.94   | -6.26       | 1.99E-06   |
| 98478_at    | Ccng2               | cyclin G2                                    | 151.45   | 860.39   | -5.68       | 1.99E-06   |
| 100009_r_at | Sox2                | SRY-box containing gene 2                    | 89.20    | 1058.39  | -11.86      | 2.14E-06   |
| 99191_at    | Eid1                | EP300 interacting inhibitor of diff          | 110.09   | 3041.85  | -27.63      | 2.94E-06   |
| 160352_at   | Pcbp4               | poly(rC) binding protein 4                   | 481.10   | 1161.43  | -2.41       | 3.06E-06   |
| 92420_at    | Ntf3                | neurotrophin 3                               | 92.18    | 267.16   | -2.90       | 3.20E-06   |
| 101680_at   | EG432798 /// EG665: | ribosomal protein L27a /// predic            | 156.45   | 2235.86  | -14.29      | 3.24E-06   |
| 160234_at   | Usp1                | ubiquitin specific peptidase 1               | 28.75    | 234.97   | -8.17       | 3.36E-06   |
| 95059_at    | Pnrc2               | proline-rich nuclear receptor coa            | 726.26   | 3707.49  | -5.10       | 3.39E-06   |
| 94839_at    | Nucb1               | nucleobindin 1                               | 6304.97  | 923.27   | 6.83        | 3.43E-06   |
| 93818_g_at  | LOC100042343 /// Tr | transmembrane emp24 domain t                 | 121.21   | 804.65   | -6.64       | 3.43E-06   |
| 92801_at    | Plp1                | proteolipid protein (myelin) 1               | 187.93   | 2668.23  | -14.20      | 3.43E-06   |
| 98564_f_at  | LOC100042812 /// LC | ribosomal protein S26 /// similar            | 1118.75  | 4149.20  | -3.71       | 3.47E-06   |
| 104516_at   | Cldn5               | claudin 5                                    | 189.36   | 996.58   | -5.26       | 3.47E-06   |
| 94931_at    | Ufm1                | ubiquitin-fold modifier 1                    | 120.81   | 516.07   | -4.27       | 3.49E-06   |
| 92526_f_at  | Btbd14a             | BTB (POZ) domain containing 14a              | 7395.96  | 372.48   | 19.86       | 3.52E-06   |
| 98048_at    | Fusip1              | FUS interacting protein (serine-ar           | 77.43    | 229.60   | -2.97       | 3.53E-06   |
| 95122_g_at  | Pole4               | polymerase (DNA-directed), epsilon           | 252.26   | 99.07    | 2.55        | 3.54E-06   |
| 92717_at    | Neurod1             | neurogenic differentiation 1                 | 46.86    | 962.11   | -20.53      | 3.59E-06   |
| 94232_at    | Ccnd1               | cyclin D1                                    | 224.77   | 489.31   | -2.18       | 3.59E-06   |
| 95726_at    | Mlf2                | myeloid leukemia factor 2                    | 656.42   | 2229.80  | -3.40       | 3.61E-06   |
| 162182_f_at | Kcnab2              | potassium voltage-gated channel              | 3404.90  | 362.85   | 9.38        | 3.64E-06   |
| 103543_at   | Sez6l               | seizure related 6 homolog like               | 188.96   | 854.91   | -4.52       | 3.66E-06   |
| 95340_at    | Mt3                 | metallothionein 3                            | 1705.20  | 3888.76  | -2.28       | 3.69E-06   |
| 100618_f_at | EG433923 /// LOC63: | solute carrier family 25 (mitochon           | 406.65   | 2028.54  | -4.99       | 3.70E-06   |
| 103692_at   | Efnb3               | ephrin B3                                    | 442.61   | 1048.04  | -2.37       | 3.75E-06   |
| 103063_at   | Zfp62               | zinc finger protein 62                       | 35.66    | 172.65   | -4.84       | 3.75E-06   |
| 94489_at    | EG667723 /// LOC10: | protein tyrosine phosphatase 4a1             | 416.55   | 4070.36  | -9.77       | 3.76E-06   |
| 99532_at    | Tob1                | transducer of ErbB-2.1                       | 276.23   | 1492.06  | -5.40       | 3.79E-06   |
| 101529_g_at | Tcea1               | transcription elongation factor A            | 182.40   | 680.54   | -3.73       | 3.85E-06   |
| 93090_at    | Fgfr2               | fibroblast growth factor receptor            | 343.63   | 955.84   | -2.78       | 3.95E-06   |
| 103416_at   | Mapk6               | mitogen-activated protein kinase             | 312.50   | 1460.82  | -4.67       | 3.97E-06   |
| 160085_at   | Tst                 | thiosulfate sulfurtransferase, mitochondrial | 217.51   | 597.17   | -2.75       | 4.17E-06   |
| 101664_at   | Rps3a               | ribosomal protein S3a                        | 1614.22  | 11207.72 | -6.94       | 4.30E-06   |
| 94802_at    | BC060632 /// LOC10: | cDNA sequence BC060632 /// similar           | 227.31   | 1522.62  | -6.70       | 4.30E-06   |
| 93714_f_at  | EG630499            | predicted gene, EG630499                     | 3155.02  | 1476.57  | 2.14        | 4.36E-06   |
| 96865_at    | Marcks              | myristoylated alanine rich protein           | 256.63   | 4955.59  | -19.31      | 4.49E-06   |
| 104433_at   | Atp13a2             | ATPase type 13A2                             | 480.39   | 1241.99  | -2.59       | 4.51E-06   |
| 93374_at    | Jph3                | junctional protein 3                         | 6369.39  | 1861.41  | 3.42        | 4.52E-06   |
| 95471_at    | Cdkn1c              | cyclin-dependent kinase inhibitor            | 38.74    | 186.92   | -4.82       | 4.56E-06   |
| 102001_at   | Rrm2                | ribonucleotide reductase M2                  | 51.09    | 160.98   | -3.15       | 4.62E-06   |
| 101930_at   | Nfix                | nuclear factor I/X                           | 333.24   | 1155.84  | -3.47       | 4.63E-06   |
| 96696_at    | Prmt1               | protein arginine N-methyltransferase         | 269.56   | 1204.85  | -4.47       | 4.63E-06   |
| 98925_at    | Vamp2               | vesicle-associated membrane protein          | 85.09    | 251.38   | -2.95       | 4.71E-06   |
| 161859_f_at | Sncg                | synuclein, gamma                             | 15748.89 | 820.95   | 19.18       | 5.15E-06   |
| 103931_at   | Gpr162              | G protein-coupled receptor 162               | 494.30   | 1257.27  | -2.54       | 5.19E-06   |
| 94236_at    | Nisch               | nischarin                                    | 6891.31  | 2493.99  | 2.76        | 5.48E-06   |
| 98580_at    | Ppm1a               | protein phosphatase 1A, magnesium            | 3195.71  | 500.82   | 6.38        | 5.53E-06   |
| 100318_at   | Dnajb13             | DnaJ (Hsp40) related, subfamily E            | 300.19   | 602.62   | -2.01       | 5.55E-06   |

|             |                           |                                         |          |          |         |          |
|-------------|---------------------------|-----------------------------------------|----------|----------|---------|----------|
| 93730_at    | Rps15a                    | ribosomal protein S15a                  | 494.56   | 7498.49  | -15.16  | 5.55E-06 |
| 96358_at    | EG667423 /// LOC100430300 | ribosomal protein S23 /// predict       | 658.83   | 13251.66 | -20.11  | 5.63E-06 |
| 96300_f_at  | LOC100043030 /// LC       | ribosomal protein S27 /// similar       | 1114.59  | 8203.25  | -7.36   | 5.67E-06 |
| 102309_at   | Zfp326                    | zinc finger protein 326                 | 83.52    | 339.43   | -4.06   | 5.69E-06 |
| 104179_at   | Arf6                      | ADP-ribosylation factor 6               | 29.94    | 141.50   | -4.73   | 5.69E-06 |
| 94876_f_at  | Gorasp2                   | golgi reassembly stacking protein       | 5112.94  | 1628.25  | 3.14    | 5.85E-06 |
| 104249_g_at | Ssr3                      | signal sequence receptor, gamma         | 128.72   | 699.94   | -5.44   | 5.90E-06 |
| 99872_s_at  | EG665937 /// Ftl1 ///     | ferritin light chain 1 /// ferritin lig | 2237.47  | 5820.45  | -2.60   | 5.91E-06 |
| 95681_f_at  | Ppp1r2                    | protein phosphatase 1, regulator        | 901.47   | 175.23   | 5.14    | 5.91E-06 |
| 94088_at    | Ptbp2                     | polypyrimidine tract binding prot       | 76.85    | 416.81   | -5.42   | 6.04E-06 |
| 104186_at   | Msl2l1                    | male-specific lethal 2-like 1 (Dros     | 131.67   | 363.56   | -2.76   | 6.07E-06 |
| 95633_r_at  | Mvk                       | mevalonate kinase                       | 346.40   | 694.73   | -2.01   | 6.07E-06 |
| 103800_at   | Abcc5                     | ATP-binding cassette, sub-family        | 3542.75  | 1319.81  | 2.68    | 6.15E-06 |
| 162001_f_at | Csnk1d                    | casein kinase 1, delta                  | 612.45   | 222.48   | 2.75    | 6.15E-06 |
| 93120_f_at  | H2-K1                     | histocompatibility 2, K1, K region      | 3812.43  | 1153.15  | 3.31    | 6.20E-06 |
| 99575_at    | Ubqln1                    | ubiquilin 1                             | 164.39   | 1438.39  | -8.75   | 6.22E-06 |
| 93509_at    | Ube2b                     | ubiquitin-conjugating enzyme E2         | 4732.46  | 991.38   | 4.77    | 6.25E-06 |
| 93740_at    | LOC100045189 /// Yt       | Y box protein 1 /// similar to tran     | 4000.80  | 15265.46 | -3.82   | 6.32E-06 |
| 92628_at    | LOC100043718 /// LC       | ribosomal protein L36 /// similar       | 295.43   | 3948.95  | -13.37  | 6.33E-06 |
| 104608_at   | Tm2d1                     | TM2 domain containing 1                 | 46.79    | 138.89   | -2.97   | 6.34E-06 |
| 93568_i_at  | 2610042L04Rik /// B       | RIKEN cDNA B930046C15 gene //           | 123.06   | 1776.90  | -14.44  | 6.36E-06 |
| 95417_at    | Mgat2                     | mannoside acetylglucosaminyltra         | 42.81    | 218.56   | -5.11   | 6.40E-06 |
| 104169_at   | LOC100044533 /// Zi       | zinc finger protein of the cerebell     | 101.51   | 12897.92 | -127.06 | 6.48E-06 |
| 93547_at    | Cbfb                      | core binding factor beta                | 22974.17 | 4301.17  | 5.34    | 6.78E-06 |
| 100024_at   | Shroom3                   | shroom family member 3                  | 2719.16  | 130.32   | 20.87   | 6.96E-06 |
| 101577_at   | LOC100043734 /// LC       | ribosomal protein S6 /// similar t      | 3880.85  | 8771.42  | -2.26   | 6.97E-06 |
| 96699_at    | Hmgn1 /// LOC10004        | high mobility group nucleosomal         | 2342.35  | 9389.00  | -4.01   | 7.02E-06 |
| 101528_at   | Tcea1                     | transcription elongation factor A       | 95.08    | 498.33   | -5.24   | 7.06E-06 |
| 96002_at    | Vps24                     | vacuolar protein sorting 24 (yeas       | 1753.76  | 571.33   | 3.07    | 7.57E-06 |
| 102234_at   | 1810037117Rik             | RIKEN cDNA 1810037117 gene              | 275.99   | 840.97   | -3.05   | 7.79E-06 |
| 94842_at    | Blmh                      | bleomycin hydrolase                     | 860.33   | 1919.45  | -2.23   | 7.79E-06 |
| 103781_at   | Stx4a                     | syntaxin 4A (placental)                 | 3613.97  | 650.19   | 5.56    | 7.80E-06 |
| 103534_at   | Hbb-b2                    | hemoglobin, beta adult minor ch.        | 143.33   | 4855.37  | -33.88  | 7.85E-06 |
| 100557_g_at | Eif4b                     | eukaryotic translation initiation f.    | 350.92   | 1263.94  | -3.60   | 7.87E-06 |
| 97722_at    | Ssr1                      | signal sequence receptor, alpha         | 139.63   | 433.95   | -3.11   | 8.04E-06 |
| 103080_at   | Samhd1                    | SAM domain and HD domain, 1             | 476.15   | 144.93   | 3.29    | 8.04E-06 |
| 160588_at   | LOC100040573 /// Zf       | zinc finger protein 131 /// similar     | 146.92   | 355.16   | -2.42   | 8.07E-06 |
| 100963_at   | Pnkd                      | paroxysmal nonkinesiogenic dysk         | 246.20   | 594.62   | -2.42   | 8.08E-06 |
| 161127_i_at | Rpl24                     | ribosomal protein L24                   | 112.81   | 581.08   | -5.15   | 8.10E-06 |
| 161575_f_at | Mapk10                    | mitogen-activated protein kinase        | 2389.96  | 298.92   | 8.00    | 8.17E-06 |
| 93519_s_at  | Nedd8                     | neural precursor cell expressed, c      | 362.18   | 1628.30  | -4.50   | 8.48E-06 |
| 96299_at    | 2900097C17Rik             | RIKEN cDNA 2900097C17 gene              | 10458.10 | 3154.43  | 3.32    | 8.66E-06 |
| 95737_at    | Tprgl                     | transformation related protein 6:       | 3786.64  | 812.66   | 4.66    | 8.70E-06 |
| 97977_at    | LOC672215 /// Ntn1        | netrin 1 /// similar to Netrin-1 pr     | 295.94   | 649.57   | -2.19   | 8.87E-06 |
| 92518_at    | Neo1                      | neogenin                                | 468.51   | 960.38   | -2.05   | 8.91E-06 |
| 93721_at    | Cap1                      | CAP, adenylate cyclase-associate        | 75.30    | 200.20   | -2.66   | 8.96E-06 |
| 101781_f_at | EG238836 /// EG623:       | H3 histone, family 3A /// H3 histc      | 113.24   | 842.94   | -7.44   | 9.00E-06 |
| 97907_at    | LOC100041500 /// LC       | LSM7 homolog, U6 small nuclear          | 229.96   | 919.31   | -4.00   | 9.00E-06 |
| 100708_at   | H3f3a /// H3f3b /// L     | H3 histone, family 3A /// H3 histc      | 833.89   | 7160.49  | -8.59   | 9.01E-06 |
| 100711_at   | LOC100043141 /// LC       | ribosomal protein L10A /// simila       | 442.40   | 3613.29  | -8.17   | 9.02E-06 |
| 98934_at    | l7Rn6                     | lethal, Chr 7, Rinchik 6                | 349.45   | 1545.56  | -4.42   | 9.02E-06 |
| 98342_at    | EG234703 /// LOC100430300 | ribosomal protein 10 /// predicte       | 2087.00  | 7637.66  | -3.66   | 9.05E-06 |
| 100486_at   | Ezh1                      | enhancer of zeste homolog 1 (Dro        | 1255.54  | 292.81   | 4.29    | 9.08E-06 |
| 104092_at   | LOC674195 /// Usp4        | ubiquitin specific peptidase 48 //      | 2146.64  | 597.11   | 3.60    | 9.08E-06 |
| 96333_g_at  | Snx2                      | sorting nexin 2                         | 222.34   | 686.76   | -3.09   | 9.09E-06 |

|             |                     |                                                           |          |          |        |          |
|-------------|---------------------|-----------------------------------------------------------|----------|----------|--------|----------|
| 99579_at    | Atp1b3              | ATPase, Na <sup>+</sup> /K <sup>+</sup> transporting, bet | 15209.88 | 3945.08  | 3.86   | 9.11E-06 |
| 98338_at    | En2                 | engrailed 2                                               | 137.66   | 3549.12  | -25.78 | 9.13E-06 |
| 94889_at    | Vapa                | vesicle-associated membrane pro                           | 1745.38  | 3999.94  | -2.29  | 9.13E-06 |
| 101869_s_at | Hbb-b1 /// Hbb-b2   | hemoglobin, beta adult major chi                          | 382.92   | 11807.62 | -30.84 | 9.18E-06 |
| 95096_at    | LOC100046895 /// Ql | quaking /// similar to Quaking pr                         | 67.29    | 1169.95  | -17.39 | 9.18E-06 |
| 100630_f_at | Gstm5               | glutathione S-transferase, mu 5                           | 17165.87 | 7265.57  | 2.36   | 9.19E-06 |
| 92216_at    | Smad7               | MAD homolog 7 (Drosophila)                                | 211.58   | 551.66   | -2.61  | 9.61E-06 |
| 95129_at    | Ncor2               | nuclear receptor co-repressor 2                           | 2584.88  | 910.02   | 2.84   | 9.88E-06 |
| 161439_f_at | Ap1m1               | adaptor-related protein complex                           | 1535.13  | 483.25   | 3.18   | 1.00E-05 |
| 101294_g_at | G6pd2 /// G6pdx     | glucose-6-phosphate dehydroger                            | 145.15   | 438.00   | -3.02  | 1.01E-05 |
| 101198_at   | Cplx1               | complexin 1                                               | 1084.44  | 2328.23  | -2.15  | 1.04E-05 |
| 98967_at    | Fabp7               | fatty acid binding protein 7, brair                       | 3426.24  | 13418.30 | -3.92  | 1.04E-05 |
| 93164_at    | Rnf2                | ring finger protein 2                                     | 59.07    | 192.76   | -3.26  | 1.04E-05 |
| 101578_f_at | Actb                | actin, beta, cytoplasmic                                  | 5081.40  | 765.11   | 6.64   | 1.04E-05 |
| 97540_f_at  | H2-D1               | histocompatibility 2, D region loc                        | 3705.43  | 1127.32  | 3.29   | 1.04E-05 |
| 103514_at   | Tnfrsf21            | tumor necrosis factor receptor su                         | 3558.78  | 938.30   | 3.79   | 1.05E-05 |
| 96192_at    | D130067C23Rik /// S | trans-acting transcription factor 5                       | 59.08    | 1030.89  | -17.45 | 1.05E-05 |
| 160319_at   | Sparcl1             | SPARC-like 1 (mast9, hevin)                               | 154.88   | 4213.67  | -27.21 | 1.06E-05 |
| 98007_at    | Rps6ka2             | ribosomal protein S6 kinase, poly                         | 2584.63  | 492.50   | 5.25   | 1.07E-05 |
| 160207_at   | Acly                | ATP citrate lyase                                         | 8278.10  | 2096.11  | 3.95   | 1.07E-05 |
| 103886_at   | Reep5               | receptor accessory protein 5                              | 7271.31  | 2096.20  | 3.47   | 1.13E-05 |
| 100123_f_at | Itgb1               | integrin beta 1 (fibronectin recep                        | 11763.36 | 3600.83  | 3.27   | 1.13E-05 |
| 100360_f_at | LOC100046359        | similar to lghg1 protein                                  | 274.34   | 576.22   | -2.10  | 1.15E-05 |
| 92887_at    | Ddah2               | dimethylarginine dimethylaminol                           | 1269.72  | 4922.43  | -3.88  | 1.15E-05 |
| 92376_at    | Rit1                | Ras-like without CAAX 1                                   | 3228.68  | 900.57   | 3.59   | 1.16E-05 |
| 98004_at    | Pkia                | protein kinase inhibitor, alpha                           | 64.48    | 349.77   | -5.42  | 1.17E-05 |
| 94817_at    | Serpinh1            | serine (or cysteine) peptidase inh                        | 142.96   | 574.46   | -4.02  | 1.18E-05 |
| 97255_at    | Cugbp2              | CUG triplet repeat, RNA binding p                         | 57.44    | 708.02   | -12.33 | 1.19E-05 |
| 97329_at    | Ints3               | integrator complex subunit 3                              | 1702.12  | 434.06   | 3.92   | 1.21E-05 |
| 160917_r_at | Mageh1              | melanoma antigen, family H, 1                             | 21.36    | 49.63    | -2.32  | 1.21E-05 |
| 92180_at    | H1fx                | H1 histone family, member X                               | 149.69   | 376.68   | -2.52  | 1.21E-05 |
| 96801_at    | Ak1                 | adenylate kinase 1                                        | 1281.99  | 456.82   | 2.81   | 1.21E-05 |
| 93592_at    | Apod                | apolipoprotein D                                          | 148.75   | 380.79   | -2.56  | 1.22E-05 |
| 101944_at   | Lypla1              | lysophospholipase 1                                       | 798.55   | 1902.92  | -2.38  | 1.22E-05 |
| 94321_at    | Krt10               | keratin 10                                                | 61.86    | 300.39   | -4.86  | 1.22E-05 |
| 161214_r_at | BC037034            | cDNA sequence BC037034                                    | 5522.61  | 1399.41  | 3.95   | 1.22E-05 |
| 101212_at   | Rps7                | ribosomal protein S7                                      | 383.31   | 9782.66  | -25.52 | 1.23E-05 |
| 100573_f_at | Gpi1                | glucose phosphate isomerase 1                             | 3359.98  | 431.37   | 7.79   | 1.23E-05 |
| 160493_at   | Cd63                | Cd63 antigen                                              | 564.09   | 3056.00  | -5.42  | 1.23E-05 |
| 160832_at   | Ldlr                | low density lipoprotein receptor                          | 8946.18  | 591.30   | 15.13  | 1.23E-05 |
| 98302_at    | Scn10a              | sodium channel, voltage-gated, t                          | 8424.97  | 217.38   | 38.76  | 1.23E-05 |
| 100710_at   | Vcp                 | valosin containing protein                                | 10807.44 | 2698.64  | 4.00   | 1.24E-05 |
| 101564_at   | Cnot7               | CCR4-NOT transcription complex                            | 43.10    | 154.95   | -3.59  | 1.24E-05 |
| 97368_at    | Akap1               | A kinase (PRKA) anchor protein 1                          | 1349.21  | 3758.61  | -2.79  | 1.27E-05 |
| 99633_at    | Ncdn                | neurochondrin                                             | 15194.03 | 2433.98  | 6.24   | 1.28E-05 |
| 161482_f_at | Prph                | peripherin                                                | 9885.62  | 321.64   | 30.74  | 1.29E-05 |
| 98631_g_at  | Nsdhl               | NAD(P) dependent steroid dehyd                            | 287.30   | 1084.06  | -3.77  | 1.30E-05 |
| 102137_f_at | ---                 | ---                                                       | 1848.78  | 912.37   | 2.03   | 1.30E-05 |
| 103574_at   | Ablim1              | actin-binding LIM protein 1                               | 1872.45  | 382.24   | 4.90   | 1.30E-05 |
| 93548_at    | Sec61b              | Sec61 beta subunit                                        | 147.88   | 969.88   | -6.56  | 1.31E-05 |
| 104246_at   | Asx1                | additional sex combs like 1 (Dros                         | 2301.85  | 972.17   | 2.37   | 1.31E-05 |
| 92545_f_at  | Ptgds               | prostaglandin D2 synthase (brain                          | 253.60   | 2690.20  | -10.61 | 1.31E-05 |
| 162225_f_at | ---                 | ---                                                       | 988.01   | 249.88   | 3.95   | 1.31E-05 |
| 104330_g_at | Arid1a              | AT rich interactive domain 1A (Sv                         | 101.98   | 220.69   | -2.16  | 1.31E-05 |
| 104305_at   | Rars2               | arginyl-tRNA synthetase 2, mitoc                          | 1744.95  | 708.09   | 2.46   | 1.31E-05 |

|             |                     |                                      |          |          |        |          |
|-------------|---------------------|--------------------------------------|----------|----------|--------|----------|
| 97960_at    | Usp22               | ubiquitin specific peptidase 22      | 52.92    | 453.13   | -8.56  | 1.31E-05 |
| 94957_at    | Prepl               | prolyl endopeptidase-like            | 8412.97  | 1832.64  | 4.59   | 1.32E-05 |
| 103843_at   | Gnao1               | guanine nucleotide binding prote     | 17453.16 | 5659.26  | 3.08   | 1.32E-05 |
| 95688_at    | Degs1               | degenerative spermatocyte hom        | 5450.91  | 1100.60  | 4.95   | 1.32E-05 |
| 100727_at   | Rpl28               | ribosomal protein L28                | 1112.70  | 9887.32  | -8.89  | 1.32E-05 |
| 160165_at   | Ube2m               | ubiquitin-conjugating enzyme E2      | 198.32   | 461.71   | -2.33  | 1.32E-05 |
| 96290_f_at  | EG433125 /// EG433: | ribosomal protein L21 /// similar    | 1614.98  | 10065.45 | -6.23  | 1.32E-05 |
| 103032_at   | Tpst1               | protein-tyrosine sulfotransferase    | 2123.70  | 526.10   | 4.04   | 1.32E-05 |
| 161318_f_at | Ctnna2              | catenin (cadherin associated prot    | 976.68   | 75.93    | 12.86  | 1.32E-05 |
| 92228_at    | Ctnna2              | catenin (cadherin associated prot    | 6364.46  | 972.65   | 6.54   | 1.32E-05 |
| 95430_f_at  | LOC100048562 /// Sp | spastic paraplegia 21 homolog (h     | 2719.97  | 380.47   | 7.15   | 1.32E-05 |
| 92880_at    | Mfge8               | milk fat globule-EGF factor 8 prot   | 1526.45  | 3450.54  | -2.26  | 1.33E-05 |
| 94781_at    | Hba-a1              | hemoglobin alpha, adult chain 1      | 644.02   | 16008.09 | -24.86 | 1.33E-05 |
| 92270_at    | Tro                 | trophinin                            | 10323.89 | 1377.30  | 7.50   | 1.33E-05 |
| 92932_at    | Cbln1 /// LOC100046 | cerebellin 1 precursor protein ///   | 1013.88  | 6287.57  | -6.20  | 1.33E-05 |
| 94833_at    | Fstl1               | follistatin-like 1                   | 5702.30  | 258.55   | 22.05  | 1.36E-05 |
| 95132_r_at  | Ndufb2              | NADH dehydrogenase (ubiquinor        | 1202.01  | 5546.92  | -4.61  | 1.37E-05 |
| 103088_at   | Chl1                | cell adhesion molecule with hom      | 2884.15  | 267.75   | 10.77  | 1.38E-05 |
| 95795_at    | Supt4h2             | suppressor of Ty 4 homolog 2 (S.     | 40.30    | 275.46   | -6.84  | 1.38E-05 |
| 97277_at    | Triap1              | TP53 regulated inhibitor of apopt    | 1257.09  | 308.00   | 4.08   | 1.38E-05 |
| 94305_at    | Col1a1              | collagen, type I, alpha 1            | 166.59   | 451.13   | -2.71  | 1.39E-05 |
| 98767_at    | Yy1                 | YY1 transcription factor             | 3882.20  | 730.28   | 5.32   | 1.40E-05 |
| 93806_at    | Sh3bgrl             | SH3-binding domain glutamic aci      | 154.15   | 900.71   | -5.84  | 1.40E-05 |
| 101083_s_at | Lsm2                | LSM2 homolog, U6 small nuclear       | 207.24   | 465.74   | -2.25  | 1.40E-05 |
| 96130_at    | Slk                 | STE20-like kinase (yeast)            | 1973.99  | 885.85   | 2.23   | 1.41E-05 |
| 95603_at    | Gldc                | glycine decarboxylase                | 185.85   | 380.50   | -2.05  | 1.41E-05 |
| 92499_at    | Uncx                | UNC homeobox                         | 73.56    | 393.99   | -5.36  | 1.42E-05 |
| 97104_g_at  | Rfk                 | riboflavin kinase                    | 145.33   | 321.52   | -2.21  | 1.42E-05 |
| 101593_at   | Crip2               | cysteine rich protein 2              | 7921.59  | 928.38   | 8.53   | 1.42E-05 |
| 100780_at   | Rps4x               | ribosomal protein S4, X-linked       | 2250.08  | 7874.74  | -3.50  | 1.43E-05 |
| 93892_at    | Cugbp2              | CUG triplet repeat, RNA binding p    | 84.25    | 223.16   | -2.65  | 1.46E-05 |
| 93843_at    | Dhrs1               | dehydrogenase/reductase (SDR f       | 3237.85  | 1553.51  | 2.08   | 1.46E-05 |
| 103908_at   | Sdccag3             | serologically defined colon cance    | 96.79    | 296.26   | -3.06  | 1.50E-05 |
| 104352_at   | Brd4                | bromodomain containing 4             | 4474.81  | 1579.43  | 2.83   | 1.51E-05 |
| 92691_at    | Ppp2r2b             | protein phosphatase 2 (formerly      | 559.16   | 2087.30  | -3.73  | 1.51E-05 |
| 95135_at    | Mid1ip1             | Mid1 interacting protein 1 (gastri   | 3591.57  | 869.87   | 4.13   | 1.51E-05 |
| 103094_at   | Serf1               | small EDRK-rich factor 1             | 261.77   | 562.67   | -2.15  | 1.51E-05 |
| 97251_at    | Mrps10              | mitochondrial ribosomal protein      | 455.29   | 132.88   | 3.43   | 1.52E-05 |
| 99944_at    | Hpca                | hippocalcin                          | 416.15   | 1066.21  | -2.56  | 1.52E-05 |
| 102405_at   | Mag                 | myelin-associated glycoprotein       | 133.16   | 498.83   | -3.75  | 1.52E-05 |
| 94267_i_at  | Ubl5                | ubiquitin-like 5                     | 226.15   | 4060.36  | -17.95 | 1.53E-05 |
| 98610_at    | Mrps28              | mitochondrial ribosomal protein      | 95.39    | 242.97   | -2.55  | 1.53E-05 |
| 100929_at   | Mtmr9               | myotubularin related protein 9       | 1623.83  | 198.02   | 8.20   | 1.54E-05 |
| 98972_at    | Usp8                | ubiquitin specific peptidase 8       | 2358.29  | 621.43   | 3.79   | 1.60E-05 |
| 93288_at    | Arpc2               | actin related protein 2/3 comple     | 7014.05  | 2185.06  | 3.21   | 1.60E-05 |
| 162482_at   | ---                 | ---                                  | 661.19   | 1385.08  | -2.09  | 1.63E-05 |
| 103436_at   | Gtpbp1              | GTP binding protein 1                | 286.18   | 636.77   | -2.23  | 1.64E-05 |
| 98085_f_at  | LOC100039820 /// LC | ribosomal protein S28 /// similar    | 3817.15  | 16472.92 | -4.32  | 1.66E-05 |
| 94181_at    | Scrg1               | scrapie responsive gene 1            | 211.25   | 898.09   | -4.25  | 1.67E-05 |
| 99491_at    | Il10rb              | interleukin 10 receptor, beta        | 3494.89  | 680.74   | 5.13   | 1.68E-05 |
| 92664_at    | Zfp777              | zinc finger protein 777              | 76.40    | 200.41   | -2.62  | 1.69E-05 |
| 102732_at   | Tln1                | talin 1                              | 451.73   | 1034.11  | -2.29  | 1.71E-05 |
| 104586_at   | Sfrs1               | splicing factor, arginine/serine-ric | 54.63    | 284.48   | -5.21  | 1.71E-05 |
| 92947_s_at  | Gria2               | glutamate receptor, ionotropic, A    | 608.44   | 1709.53  | -2.81  | 1.71E-05 |
| 94903_at    | Tmed7               | transmembrane emp24 protein t        | 594.98   | 2104.86  | -3.54  | 1.72E-05 |

|                |                      |                                     |          |          |        |          |
|----------------|----------------------|-------------------------------------|----------|----------|--------|----------|
| 96193_at       | Dmwd                 | dystrophia myotonica-containing     | 147.90   | 299.59   | -2.03  | 1.72E-05 |
| 93918_at       | Taf9                 | TAF9 RNA polymerase II, TATA bc     | 48.64    | 517.12   | -10.63 | 1.76E-05 |
| 97318_at       | Dtd1 /// LOC1000486  | D-tyrosyl-tRNA deacylase 1 homoc    | 1694.76  | 436.94   | 3.88   | 1.77E-05 |
| 103555_at      | Chmp4b /// LOC6747   | chromatin modifying protein 4B ,    | 10574.09 | 4283.06  | 2.47   | 1.77E-05 |
| 95714_at       | 0610009D07Rik        | RIKEN cDNA 0610009D07 gene          | 660.57   | 1813.62  | -2.75  | 1.79E-05 |
| 97520_s_at     | Nnat                 | neuronatin                          | 84.05    | 1420.72  | -16.90 | 1.79E-05 |
| 162415_f_at    | Cant1                | calcium activated nucleotidase 1    | 1709.20  | 827.79   | 2.06   | 1.80E-05 |
| 96912_s_at     | Ctla2a /// Ctla2b    | cytotoxic T lymphocyte-associate    | 90.18    | 187.21   | -2.08  | 1.81E-05 |
| 160286_at      | Dek                  | DEK oncogene (DNA binding)          | 100.14   | 445.07   | -4.44  | 1.82E-05 |
| 104222_f_at    | Ggps1 /// LOC100045  | geranylgeranyl diphosphate syntl    | 171.19   | 366.53   | -2.14  | 1.85E-05 |
| 100005_at      | Traf4                | Tnf receptor associated factor 4    | 460.98   | 997.35   | -2.16  | 1.90E-05 |
| 160455_s_at    | Zwint                | ZW10 interactor                     | 20620.25 | 7131.08  | 2.89   | 1.92E-05 |
| 103697_at      | Lifr                 | leukemia inhibitory factor recept   | 2539.03  | 179.98   | 14.11  | 1.94E-05 |
| 104437_at      | Zfp30                | zinc finger protein 30              | 64.30    | 131.71   | -2.05  | 1.95E-05 |
| 96167_at       | Bag3                 | Bcl2-associated athanogene 3        | 4043.67  | 469.98   | 8.60   | 1.95E-05 |
| 96575_at       | Rpl8                 | ribosomal protein L8                | 698.05   | 2390.49  | -3.42  | 1.95E-05 |
| 93095_at       | 2810416G20Rik /// H  | high mobility group box 1 /// RIK   | 184.09   | 1075.82  | -5.84  | 1.95E-05 |
| AFFX-GapdhMur/ | Gapdh                | glyceraldehyde-3-phosphate deh      | 163.36   | 9966.85  | -61.01 | 1.98E-05 |
| 100562_at      | Rangrf               | RAN guanine nucleotide release f    | 308.74   | 722.99   | -2.34  | 1.99E-05 |
| 98571_s_at     | Naca                 | nascent polypeptide-associated c    | 258.63   | 2611.85  | -10.10 | 2.01E-05 |
| 101954_at      | H2afz                | H2A histone family, member Z        | 661.75   | 2833.08  | -4.28  | 2.02E-05 |
| 100974_at      | Ssbp4                | single stranded DNA binding prot    | 247.81   | 605.51   | -2.44  | 2.03E-05 |
| 160195_at      | 1200013P24Rik        | RIKEN cDNA 1200013P24 gene          | 2604.81  | 1147.97  | 2.27   | 2.04E-05 |
| 95635_g_at     | 0610010K14Rik        | RIKEN cDNA 0610010K14 gene          | 620.06   | 1494.56  | -2.41  | 2.06E-05 |
| 160249_at      | Tpd52                | tumor protein D52                   | 3660.18  | 485.48   | 7.54   | 2.08E-05 |
| 102870_at      | Dynlt1 /// LOC100041 | dynein light chain Tctex-type 1 //  | 308.48   | 7947.01  | -25.76 | 2.16E-05 |
| 161612_f_at    | Tubb3 /// Tubb3-ps1  | tubulin, beta 3 /// tubulin, beta 3 | 7049.60  | 2160.61  | 3.26   | 2.16E-05 |
| 99544_at       | Dguok                | deoxyguanosine kinase               | 808.04   | 297.46   | 2.72   | 2.16E-05 |
| 95079_at       | Pdgfra               | platelet derived growth factor rei  | 258.83   | 631.41   | -2.44  | 2.17E-05 |
| 92587_at       | Fdx1                 | ferredoxin 1                        | 3511.23  | 1038.41  | 3.38   | 2.17E-05 |
| 160875_at      | Psmb1                | proteasome (prosome, macropai       | 7221.37  | 3100.37  | 2.33   | 2.17E-05 |
| 97864_at       | 2510049I19Rik        | RIKEN cDNA 2510049I19 gene          | 38.07    | 127.75   | -3.36  | 2.17E-05 |
| 92804_at       | Polr2h               | polymerase (RNA) II (DNA directe    | 211.04   | 557.92   | -2.64  | 2.18E-05 |
| 94300_f_at     | Dctn2                | dynactin 2                          | 5165.45  | 1137.08  | 4.54   | 2.18E-05 |
| 96755_at       | Etf1                 | eukaryotic translation terminatio   | 436.65   | 1087.68  | -2.49  | 2.18E-05 |
| 160724_at      | Med20                | mediator complex subunit 20         | 985.10   | 199.05   | 4.95   | 2.18E-05 |
| 93511_at       | Itn2a                | integral membrane protein 2A        | 40.76    | 436.92   | -10.72 | 2.18E-05 |
| 98549_at       | Vtn                  | vitronectin                         | 171.90   | 572.31   | -3.33  | 2.18E-05 |
| 93312_at       | Ube2g1               | ubiquitin-conjugating enzyme E2     | 461.08   | 2615.68  | -5.67  | 2.18E-05 |
| 100628_at      | Ndufc1               | NADH dehydrogenase (ubiquinor       | 747.90   | 2143.94  | -2.87  | 2.18E-05 |
| 160725_at      | 4930432O21Rik        | RIKEN cDNA 4930432O21 gene          | 38.27    | 82.62    | -2.16  | 2.19E-05 |
| 94034_at       | Rexo2                | REX2, RNA exonuclease 2 homolc      | 488.86   | 231.92   | 2.11   | 2.19E-05 |
| 160522_at      | DOH4S114             | DNA segment, human D4S114           | 1261.55  | 19396.11 | -15.37 | 2.19E-05 |
| 98064_at       | Aamp                 | angio-associated migratory prote    | 695.05   | 2171.57  | -3.12  | 2.19E-05 |
| 93396_at       | Slc4a1ap             | solute carrier family 4 (anion excl | 497.10   | 147.68   | 3.37   | 2.19E-05 |
| 99503_at       | Pptc7                | PTC7 protein phosphatase homol      | 9041.48  | 705.76   | 12.81  | 2.19E-05 |
| 98892_at       | Lpin1                | lipin 1                             | 2163.35  | 182.79   | 11.83  | 2.20E-05 |
| 95696_at       | Glrx3 /// LOC620016  | glutaredoxin 3 /// similar to thior | 7655.78  | 2454.77  | 3.12   | 2.20E-05 |
| 98339_at       | Syt11                | synaptotagmin XI                    | 554.73   | 1483.00  | -2.67  | 2.20E-05 |
| 94449_at       | Pcdhga1 /// Pcdhga1  | protocadherin gamma subfamily       | 1731.01  | 4824.56  | -2.79  | 2.21E-05 |
| AFFX-MURINE_b1 | ---                  | ---                                 | 1237.08  | 22081.32 | -17.85 | 2.21E-05 |
| 100694_at      | Rplp1                | ribosomal protein, large, P1        | 3412.38  | 9798.83  | -2.87  | 2.23E-05 |
| 93823_at       | Ilf2                 | interleukin enhancer binding fact   | 187.50   | 1140.01  | -6.08  | 2.23E-05 |
| 160393_at      | Etnk1                | ethanolamine kinase 1               | 3602.12  | 473.53   | 7.61   | 2.24E-05 |
| 96165_at       | LOC677213 /// Uhmk   | U2AF homology motif (UHM) kin;      | 5575.65  | 1433.28  | 3.89   | 2.24E-05 |



|                      |                      |                                     |          |          |       |          |
|----------------------|----------------------|-------------------------------------|----------|----------|-------|----------|
| 102476_f_at          | Xpo7                 | exportin 7                          | 2865.71  | 508.07   | 5.64  | 2.27E-05 |
| 104634_at            | Lims1                | LIM and senescent cell antigen-lil  | 2616.49  | 549.68   | 4.76  | 2.28E-05 |
| 160313_at            | Ythdc1               | YTH domain containing 1             | 185.46   | 474.75   | -2.56 | 2.34E-05 |
| 98436_s_at           | Casp3                | caspase 3                           | 120.50   | 417.27   | -3.46 | 2.35E-05 |
| 98884_r_at           | Ndel1                | nuclear distribution gene E-like h  | 1641.34  | 418.74   | 3.92  | 2.37E-05 |
| 97250_at             | Nola3                | nucleolar protein family A, memk    | 686.84   | 2420.44  | -3.52 | 2.37E-05 |
| 102715_at            | LOC100046044 /// Ni  | nuclear receptor subfamily 2, gro   | 101.35   | 354.22   | -3.50 | 2.38E-05 |
| 162442_r_at          | ---                  | ---                                 | 531.64   | 195.19   | 2.72  | 2.38E-05 |
| 98477_s_at           | Ank3                 | ankyrin 3, epithelial               | 1404.69  | 479.39   | 2.93  | 2.39E-05 |
| 160123_at            | Phpt1                | phosphohistidine phosphatase 1      | 315.88   | 1545.59  | -4.89 | 2.39E-05 |
| 92262_at             | Zmat3                | zinc finger matrin type 3           | 2208.92  | 695.39   | 3.18  | 2.39E-05 |
| 102376_r_at          | Pcp2                 | Purkinje cell protein 2 (L7)        | 1001.30  | 4226.91  | -4.22 | 2.39E-05 |
| 97333_at             | Dync1h1              | dynein cytoplasmic 1 heavy chair    | 11844.40 | 1082.70  | 10.94 | 2.40E-05 |
| AFFX-b-ActinMur/Actb |                      | actin, beta, cytoplasmic            | 73.78    | 173.59   | -2.35 | 2.41E-05 |
| 101518_at            | Ift20                | intraflagellar transport 20 homol   | 1229.88  | 89.11    | 13.80 | 2.41E-05 |
| 100155_at            | Ddr1                 | discoidin domain receptor family    | 284.15   | 672.23   | -2.37 | 2.41E-05 |
| 93716_at             | Trim46               | tripartite motif-containing 46      | 232.31   | 474.70   | -2.04 | 2.43E-05 |
| 101959_r_at          | Tfdp1                | transcription factor Dp 1           | 174.32   | 849.54   | -4.87 | 2.44E-05 |
| 99938_at             | Xrcc1                | X-ray repair complementing defe     | 162.33   | 402.36   | -2.48 | 2.47E-05 |
| 99000_at             | Mapk7                | mitogen-activated protein kinase    | 539.44   | 1136.88  | -2.11 | 2.47E-05 |
| 104077_at            | Lage3                | L antigen family, member 3          | 186.53   | 548.86   | -2.94 | 2.47E-05 |
| 160758_at            | Seh1l                | SEH1-like (S. cerevisiae)           | 886.88   | 422.00   | 2.10  | 2.48E-05 |
| 98516_at             | BC056474             | cDNA sequence BC056474              | 619.46   | 1427.64  | -2.30 | 2.48E-05 |
| 96781_at             | Rrn3                 | RRN3 RNA polymerase I transcrip     | 954.78   | 365.49   | 2.61  | 2.48E-05 |
| 93117_at             | Hnrnpa2b1            | heterogeneous nuclear ribonucle     | 1155.77  | 4170.98  | -3.61 | 2.49E-05 |
| 99661_r_at           | Cox7c /// LOC100048  | cytochrome c oxidase, subunit VI    | 2370.19  | 9039.38  | -3.81 | 2.51E-05 |
| 162486_f_at          | Dscr3                | Down syndrome critical region ge    | 2084.01  | 462.75   | 4.50  | 2.52E-05 |
| 93924_f_at           | LOC384954 /// Tuba3  | tubulin, alpha 3A /// tubulin, alpt | 379.24   | 1108.01  | -2.92 | 2.53E-05 |
| 93076_at             | Csnk1a1              | casein kinase 1, alpha 1            | 5553.47  | 1963.33  | 2.83  | 2.53E-05 |
| 93922_g_at           | Bat3                 | HLA-B-associated transcript 3       | 505.17   | 1098.75  | -2.18 | 2.56E-05 |
| 100984_at            | Atf1 /// LOC1000474  | activating transcription factor 1 / | 163.11   | 492.63   | -3.02 | 2.56E-05 |
| 160449_at            | Dr1                  | down-regulator of transcription 1   | 159.00   | 717.50   | -4.51 | 2.56E-05 |
| 98981_s_at           | Tcf12                | transcription factor 12             | 234.13   | 1564.59  | -6.68 | 2.59E-05 |
| 95136_at             | Arl6ip4 /// LOC10004 | ADP-ribosylation factor-like 6 intr | 1969.55  | 600.40   | 3.28  | 2.61E-05 |
| 102812_i_at          | Uba5                 | ubiquitin-like modifier activating  | 1516.90  | 341.50   | 4.44  | 2.61E-05 |
| 103771_at            | Rnf208               | ring finger protein 208             | 7706.14  | 3170.33  | 2.43  | 2.61E-05 |
| 102109_at            | EG668182 /// LOC100  | ribosomal protein L13 /// similar   | 2092.78  | 8849.62  | -4.23 | 2.62E-05 |
| 103020_s_at          | Map3k1               | mitogen-activated protein kinase    | 202.42   | 1056.74  | -5.22 | 2.62E-05 |
| 92341_at             | B3galt2              | UDP-Gal:betaGlcNAc beta 1,3-gal     | 123.96   | 295.79   | -2.39 | 2.62E-05 |
| 97422_at             | Iars2                | isoleucine-tRNA synthetase 2, mi    | 1990.64  | 370.67   | 5.37  | 2.67E-05 |
| 104605_at            | Adipor2              | adiponectin receptor 2              | 2303.15  | 656.00   | 3.51  | 2.68E-05 |
| 92525_i_at           | Btbd14a              | BTB (POZ) domain containing 14/     | 6884.62  | 589.37   | 11.68 | 2.70E-05 |
| 92808_f_at           | Fkbp4                | FK506 binding protein 4             | 9391.89  | 3663.12  | 2.56  | 2.70E-05 |
| 94455_at             | Lsm3                 | LSM3 homolog, U6 small nuclear      | 386.98   | 1142.34  | -2.95 | 2.71E-05 |
| AFFX-GapdhMur/Gapdh  |                      | glyceraldehyde-3-phosphate deh      | 1740.04  | 11269.83 | -6.48 | 2.73E-05 |
| 92944_at             | Gria1 /// LOC100044  | glutamate receptor, ionotropic, A   | 196.33   | 542.42   | -2.76 | 2.74E-05 |
| 98434_at             | Arhgef7              | Rho guanine nucleotide exchange     | 1253.27  | 2557.97  | -2.04 | 2.74E-05 |
| 102070_at            | Col9a3               | collagen, type IX, alpha 3          | 386.48   | 1016.74  | -2.63 | 2.74E-05 |
| 97923_at             | Herc1                | hect (homologous to the E6-AP (l    | 5598.36  | 857.59   | 6.53  | 2.75E-05 |
| 96337_at             | Gp1bb /// Sept5      | glycoprotein Ib, beta polypeptide   | 1270.65  | 446.38   | 2.85  | 2.75E-05 |
| 93596_i_at           | Atp5e                | ATP synthase, H+ transporting, m    | 157.03   | 911.21   | -5.80 | 2.75E-05 |
| 95699_f_at           | Dnajc8               | DnaJ (Hsp40) homolog, subfamily     | 7834.05  | 3549.66  | 2.21  | 2.75E-05 |
| 93669_f_at           | Sox11                | SRY-box containing gene 11          | 43.80    | 361.78   | -8.26 | 2.75E-05 |
| 160464_s_at          | Ndrp1                | N-myc downstream regulated ge       | 4302.77  | 519.68   | 8.28  | 2.78E-05 |
| 95694_at             | Top1                 | topoisomerase (DNA) I               | 676.45   | 2353.38  | -3.48 | 2.80E-05 |

|                      |                         |                                      |          |         |        |          |
|----------------------|-------------------------|--------------------------------------|----------|---------|--------|----------|
| 93727_at             | Gspt1                   | G1 to S phase transition 1           | 296.07   | 759.09  | -2.56  | 2.81E-05 |
| 103600_at            | Epb4.9                  | erythrocyte protein band 4.9         | 2965.48  | 1219.33 | 2.43   | 2.81E-05 |
| 93358_at             | Eif1ay                  | eukaryotic translation initiation f  | 187.86   | 529.18  | -2.82  | 2.83E-05 |
| 98912_at             | Larp5                   | La ribonucleoprotein domain far      | 2024.85  | 401.06  | 5.05   | 2.83E-05 |
| 93546_s_at           | Cbfb                    | core binding factor beta             | 8477.95  | 1397.74 | 6.07   | 2.84E-05 |
| 98992_at             | B9d1                    | B9 protein domain 1                  | 182.96   | 391.68  | -2.14  | 2.84E-05 |
| 103415_at            | Wrnip1                  | Werner helicase interacting prote    | 1237.14  | 273.89  | 4.52   | 2.85E-05 |
| 96305_at             | Bud31                   | BUD31 homolog (yeast)                | 67.75    | 210.62  | -3.11  | 2.85E-05 |
| 99621_s_at           | Sfpq                    | splicing factor proline/glutamine    | 40.96    | 272.21  | -6.65  | 2.87E-05 |
| 96093_at             | O610007P14Rik           | RIKEN cDNA O610007P14 gene           | 647.65   | 1331.41 | -2.06  | 2.88E-05 |
| 96710_at             | H2afv                   | H2A histone family, member V         | 758.41   | 2176.97 | -2.87  | 2.89E-05 |
| 94263_f_at           | Psmb7                   | proteasome (prosome, macropai        | 699.51   | 2533.64 | -3.62  | 2.92E-05 |
| 96464_at             | Plxbn2                  | plexin B2                            | 270.60   | 602.54  | -2.23  | 2.93E-05 |
| 93975_at             | Errfi1                  | ERBB receptor feedback inhibitor     | 1515.70  | 518.73  | 2.92   | 2.95E-05 |
| 94253_at             | Eif2s1                  | eukaryotic translation initiation f  | 141.41   | 693.83  | -4.91  | 2.95E-05 |
| 160538_at            | Cdk4 /// LOC640611      | cyclin-dependent kinase 4 /// sir    | 1176.91  | 2942.66 | -2.50  | 2.96E-05 |
| 102126_at            | LOC671641 /// LOC671641 | ribosomal protein S12 /// similar    | 1900.32  | 7988.21 | -4.20  | 2.97E-05 |
| 95666_at             | Cops8                   | COP9 (constitutive photomorpho       | 5828.69  | 730.68  | 7.98   | 2.97E-05 |
| 96232_at             | Cul2                    | cullin 2                             | 2205.23  | 945.35  | 2.33   | 2.98E-05 |
| 92428_at             | Asna1                   | arsA (bacterial) arsenite transpor   | 338.74   | 1229.01 | -3.63  | 2.98E-05 |
| 96917_at             | 2410166I05Rik           | RIKEN cDNA 2410166I05 gene           | 1789.94  | 633.96  | 2.82   | 3.01E-05 |
| 101579_at            | Srp9                    | signal recognition particle 9        | 4751.87  | 1379.40 | 3.44   | 3.02E-05 |
| 162262_f_at          | Gyg                     | glycogenin                           | 1434.12  | 178.57  | 8.03   | 3.02E-05 |
| 92227_s_at           | Ctnna2                  | catenin (cadherin associated prot    | 794.26   | 86.38   | 9.20   | 3.03E-05 |
| 97512_at             | 2010107E04Rik           | RIKEN cDNA 2010107E04 gene           | 1196.41  | 4405.88 | -3.68  | 3.03E-05 |
| 103046_at            | Car4                    | carbonic anhydrase 4                 | 123.93   | 340.88  | -2.75  | 3.10E-05 |
| 96318_at             | D17Wsu104e              | DNA segment, Chr 17, Wayne Sta       | 319.30   | 737.98  | -2.31  | 3.11E-05 |
| 96158_at             | Paip2b                  | poly(A) binding protein interactir   | 5371.65  | 946.94  | 5.67   | 3.12E-05 |
| 92477_at             | LOC100046080 /// Sp     | spindlin 1 /// similar to Spindlin 1 | 257.61   | 762.07  | -2.96  | 3.12E-05 |
| 93212_at             | Ptplad1                 | protein tyrosine phosphatase-like    | 65.42    | 166.06  | -2.54  | 3.13E-05 |
| 103855_at            | Plec1                   | plectin 1                            | 2134.47  | 781.85  | 2.73   | 3.16E-05 |
| 93634_at             | Fbxw11                  | F-box and WD-40 domain proteir       | 212.03   | 506.65  | -2.39  | 3.16E-05 |
| 160979_at            | Ctbp2                   | C-terminal binding protein 2         | 34.85    | 651.22  | -18.69 | 3.17E-05 |
| 95541_at             | D6Wsu176e               | DNA segment, Chr 6, Wayne Stat       | 1277.23  | 538.14  | 2.37   | 3.18E-05 |
| 161847_r_at          | 2210016L21Rik           | RIKEN cDNA 2210016L21 gene           | 452.01   | 957.21  | -2.12  | 3.19E-05 |
| 102743_at            | Mapt                    | microtubule-associated protein t     | 5037.78  | 1911.34 | 2.64   | 3.21E-05 |
| 98087_at             | Tbk1                    | TANK-binding kinase 1                | 1112.04  | 297.69  | 3.74   | 3.29E-05 |
| 93999_at             | EG666609 /// Snrpg      | small nuclear ribonucleoprotein p    | 309.09   | 1319.03 | -4.27  | 3.37E-05 |
| 93019_at             | H2afx                   | H2A histone family, member X         | 430.68   | 1526.49 | -3.54  | 3.37E-05 |
| 160963_at            | 9630050M13Rik           | RIKEN cDNA 9630050M13 gene           | 3830.74  | 781.95  | 4.90   | 3.37E-05 |
| 99087_at             | Zwint                   | ZW10 interactor                      | 14662.02 | 5832.82 | 2.51   | 3.38E-05 |
| 96302_at             | Sfrs7                   | splicing factor, arginine/serine-ric | 77.14    | 230.43  | -2.99  | 3.38E-05 |
| 101484_at            | Nbr1                    | neighbor of Brca1 gene 1             | 4014.71  | 1517.85 | 2.64   | 3.38E-05 |
| 161337_f_at          | LOC100046672 /// W      | tryptophanyl-tRNA synthetase //,     | 1182.15  | 447.76  | 2.64   | 3.39E-05 |
| 160529_r_at          | Vdac2                   | voltage-dependent anion channe       | 2992.59  | 1301.84 | 2.30   | 3.41E-05 |
| 98483_at             | Cacnb3                  | calcium channel, voltage-depend      | 2343.37  | 639.73  | 3.66   | 3.42E-05 |
| AFFX-b-ActinMur/Actb | Actb                    | actin, beta, cytoplasmic             | 925.06   | 9182.70 | -9.93  | 3.42E-05 |
| 93651_r_at           | Prp2                    | proline rich protein 2               | 793.34   | 1705.49 | -2.15  | 3.46E-05 |
| 101137_at            | Rps3                    | ribosomal protein S3                 | 3236.87  | 8323.31 | -2.57  | 3.46E-05 |
| 104280_at            | Sncg                    | synuclein, gamma                     | 3249.97  | 168.82  | 19.25  | 3.47E-05 |
| 92625_at             | Dscam1 /// LOC6656      | non-metastatic cells 2, protein (N   | 841.44   | 2685.37 | -3.19  | 3.54E-05 |
| 92200_at             | Adcyap1                 | adenylate cyclase activating poly    | 8493.56  | 168.32  | 50.46  | 3.55E-05 |
| 98629_f_at           | Hif1a                   | hypoxia inducible factor 1, alpha    | 1072.43  | 3764.93 | -3.51  | 3.55E-05 |
| 99128_at             | Atp5o /// EG432676      | ,ATP synthase, H+ transporting, m    | 2016.90  | 6903.42 | -3.42  | 3.56E-05 |
| 94979_at             | BC018507                | cDNA sequence BC018507               | 2722.87  | 689.66  | 3.95   | 3.58E-05 |

|             |                     |                                         |          |          |        |          |
|-------------|---------------------|-----------------------------------------|----------|----------|--------|----------|
| 99596_f_at  | Gnai2               | guanine nucleotide binding prote        | 18748.52 | 8265.54  | 2.27   | 3.58E-05 |
| 96084_at    | Hnrpdl              | heterogeneous nuclear ribonucle         | 251.86   | 1099.95  | -4.37  | 3.60E-05 |
| 95440_at    | 2810432L12Rik       | RIKEN cDNA 2810432L12 gene              | 3359.51  | 810.22   | 4.15   | 3.61E-05 |
| 97874_at    | 1500032D16Rik       | RIKEN cDNA 1500032D16 gene              | 164.70   | 950.17   | -5.77  | 3.63E-05 |
| 160326_at   | Cdv3                | carnitine deficiency-associated gr      | 1283.09  | 374.80   | 3.42   | 3.64E-05 |
| 162118_f_at | Btbd14a             | BTB (POZ) domain containing 14/         | 529.18   | 239.16   | 2.21   | 3.65E-05 |
| 100982_at   | Kctd9               | potassium channel tetramerisati         | 1221.44  | 151.09   | 8.08   | 3.65E-05 |
| 104095_at   | AU040320            | expressed sequence AU040320             | 3073.12  | 1457.14  | 2.11   | 3.65E-05 |
| 100213_f_at | Rpl41               | ribosomal protein L41                   | 9412.53  | 30930.51 | -3.29  | 3.65E-05 |
| 160371_at   | Arl6ip1             | ADP-ribosylation factor-like 6 int      | 7873.81  | 2683.75  | 2.93   | 3.66E-05 |
| 160866_at   | Dffa                | DNA fragmentation factor, alpha         | 3074.06  | 700.72   | 4.39   | 3.66E-05 |
| 95715_at    | Eif3k               | eukaryotic translation initiation f     | 993.82   | 2720.36  | -2.74  | 3.67E-05 |
| 160472_r_at | LOC100045217 /// Tr | transmembrane protein with EGF          | 24.27    | 74.30    | -3.06  | 3.67E-05 |
| 100895_at   | Lsg1                | large subunit GTPase 1 homolog          | 258.18   | 108.28   | 2.38   | 3.69E-05 |
| 96185_at    | Ap3d1               | adaptor-related protein complex         | 6574.12  | 1840.82  | 3.57   | 3.70E-05 |
| 102878_at   | Rad52               | RAD52 homolog ( <i>S. cerevisiae</i> )  | 129.81   | 274.82   | -2.12  | 3.70E-05 |
| 96025_g_at  | Ahcy                | S-adenosylhomocysteine hydroly          | 5814.91  | 1489.34  | 3.90   | 3.71E-05 |
| 94019_at    | Bzw1 /// LOC382722  | basic leucine zipper and W2 dom         | 213.08   | 962.00   | -4.51  | 3.75E-05 |
| 94972_at    | Rbms1               | RNA binding motif, single strand        | 3309.13  | 862.37   | 3.84   | 3.75E-05 |
| 104609_at   | Hnrpul2             | heterogeneous nuclear ribonucle         | 188.86   | 507.49   | -2.69  | 3.76E-05 |
| 97897_at    | C78339              | expressed sequence C78339               | 2325.72  | 650.27   | 3.58   | 3.77E-05 |
| 104033_at   | Ctage5              | CTAGE family, member 5                  | 2968.15  | 676.04   | 4.39   | 3.77E-05 |
| 99581_at    | Hint1               | histidine triad nucleotide binding      | 735.75   | 5382.89  | -7.32  | 3.78E-05 |
| 94303_at    | Hnrnpd              | heterogeneous nuclear ribonucle         | 367.70   | 2313.50  | -6.29  | 3.78E-05 |
| 101588_at   | Slc16a1             | solute carrier family 16 (monocar       | 46.77    | 126.89   | -2.71  | 3.79E-05 |
| 93030_at    | EG619900 /// Gm182  | ubiquitin B /// ubiquitin C /// rib     | 292.96   | 1908.52  | -6.51  | 3.86E-05 |
| 96849_at    | LOC100039343 /// LC | translocase of inner mitochondri        | 769.29   | 197.52   | 3.89   | 3.87E-05 |
| 98133_at    | Calb1               | calbindin-28K                           | 261.81   | 3453.14  | -13.19 | 3.88E-05 |
| 93057_at    | Btf3                | basic transcription factor 3            | 218.67   | 3394.48  | -15.52 | 3.88E-05 |
| 93560_at    | Acyp1               | acylphosphatase 1, erythrocyte (        | 416.82   | 1993.80  | -4.78  | 3.89E-05 |
| 102028_at   | Rassf5              | Ras association (RalGDS/AF-6) do        | 4070.35  | 178.14   | 22.85  | 3.89E-05 |
| 95929_at    | Nhlh1               | nescient helix loop helix 1             | 232.98   | 478.49   | -2.05  | 3.89E-05 |
| 96285_at    | Myadm               | myeloid-associated differentiatio       | 5477.99  | 2024.44  | 2.71   | 3.89E-05 |
| 92223_at    | C1qc                | complement component 1, q sub           | 414.88   | 1099.07  | -2.65  | 3.90E-05 |
| 96611_at    | Ndufa11             | NADH dehydrogenase (ubiquinor           | 167.97   | 1423.85  | -8.48  | 3.90E-05 |
| 94854_g_at  | Gnb1                | guanine nucleotide binding prote        | 282.33   | 1779.85  | -6.30  | 3.90E-05 |
| 98111_at    | Hsph1               | heat shock 105kDa/110kDa prote          | 5268.06  | 1500.53  | 3.51   | 3.90E-05 |
| 101684_r_at | Srst                | simple repeat sequence-containii        | 1548.40  | 714.05   | 2.17   | 3.90E-05 |
| 99651_at    | 2610209M04Rik       | RIKEN cDNA 2610209M04 gene              | 263.48   | 763.44   | -2.90  | 3.90E-05 |
| 97273_at    | Ars2                | arsenate resistance protein 2           | 2123.42  | 898.41   | 2.36   | 3.90E-05 |
| 94896_at    | Hnrpab              | heterogeneous nuclear ribonucle         | 498.84   | 1075.67  | -2.16  | 3.92E-05 |
| 96187_at    | Pkp4                | plakophilin 4                           | 374.46   | 1836.37  | -4.90  | 3.92E-05 |
| 96765_at    | ---                 | Transcribed locus                       | 8102.42  | 1457.71  | 5.56   | 3.93E-05 |
| 102862_at   | 5830404H04Rik       | RIKEN cDNA 5830404H04 gene              | 899.47   | 442.76   | 2.03   | 3.98E-05 |
| 102364_at   | Jund                | Jun proto-oncogene related gene         | 4372.26  | 13391.01 | -3.06  | 3.98E-05 |
| 96041_at    | Rbm3                | RNA binding motif protein 3             | 813.47   | 3216.83  | -3.95  | 3.99E-05 |
| 96176_at    | Arih2               | ariadne homolog 2 ( <i>Drosophila</i> ) | 997.78   | 463.71   | 2.15   | 3.99E-05 |
| 160809_at   | Tollip              | toll interacting protein                | 2683.56  | 823.79   | 3.26   | 3.99E-05 |
| 93604_f_at  | Cadm1               | cell adhesion molecule 1                | 14672.34 | 2887.08  | 5.08   | 3.99E-05 |
| 94348_f_at  | Pcmt1               | protein-L-isoaspartate (D-asparta       | 7664.66  | 1080.05  | 7.10   | 4.00E-05 |
| 100307_at   | Nfix                | nuclear factor I/X                      | 97.99    | 265.80   | -2.71  | 4.01E-05 |
| 101013_at   | LOC100041965 /// O: | ornithine decarboxylase antizyme        | 2587.60  | 7946.32  | -3.07  | 4.02E-05 |
| 96060_at    | Serpnb6a            | serine (or cysteine) peptidase inh      | 7275.17  | 291.48   | 24.96  | 4.03E-05 |
| 160270_at   | Lman1               | lectin, mannose-binding, 1              | 1080.70  | 342.92   | 3.15   | 4.07E-05 |
| 161077_f_at | Smardc2             | SWI/SNF related, matrix associati       | 6360.40  | 1218.20  | 5.22   | 4.07E-05 |



|             |                     |                                     |         |         |        |          |
|-------------|---------------------|-------------------------------------|---------|---------|--------|----------|
| 93389_at    | Prom1               | prominin 1                          | 130.87  | 363.73  | -2.78  | 4.07E-05 |
| 96524_at    | Cdr2l               | cerebellar degeneration-related 1   | 3184.81 | 990.85  | 3.21   | 4.08E-05 |
| 96658_at    | 2900010J23Rik       | RIKEN cDNA 2900010J23 gene          | 211.73  | 828.02  | -3.91  | 4.13E-05 |
| 98628_f_at  | Hif1a               | hypoxia inducible factor 1, alpha   | 1475.38 | 3768.13 | -2.55  | 4.14E-05 |
| 162284_r_at | Slc39a4             | solute carrier family 39 (zinc tran | 1557.34 | 3224.57 | -2.07  | 4.14E-05 |
| 99127_at    | Atxn10              | ataxin 10                           | 585.27  | 3443.58 | -5.88  | 4.22E-05 |
| 161050_at   | Nav2                | neuron navigator 2                  | 1584.74 | 3835.80 | -2.42  | 4.23E-05 |
| 101042_f_at | Pepd                | peptidase D                         | 2151.10 | 326.36  | 6.59   | 4.24E-05 |
| 94040_at    | Erh /// LOC10004277 | enhancer of rudimentary homolo      | 68.93   | 1673.88 | -24.28 | 4.25E-05 |
| 98330_at    | Zic3                | zinc finger protein of the cerebell | 79.08   | 209.02  | -2.64  | 4.26E-05 |
| 99559_at    | Aldh3a2             | aldehyde dehydrogenase family 3     | 947.96  | 292.27  | 3.24   | 4.26E-05 |
| 98540_g_at  | Cops2               | COP9 (constitutive photomorpho      | 90.77   | 189.50  | -2.09  | 4.29E-05 |
| 96717_at    | Ddx47               | DEAD (Asp-Glu-Ala-Asp) box poly     | 2373.74 | 698.33  | 3.40   | 4.30E-05 |
| 98950_at    | Rragc               | Ras-related GTP binding C           | 3409.13 | 1330.92 | 2.56   | 4.32E-05 |
| 96061_at    | Usp14               | ubiquitin specific peptidase 14     | 1530.72 | 421.04  | 3.64   | 4.34E-05 |
| 102727_at   | Bdnf                | brain derived neurotrophic factor   | 1341.02 | 116.86  | 11.48  | 4.34E-05 |
| 96249_at    |                     | 15-Sep selenoprotein                | 114.10  | 2297.01 | -20.13 | 4.36E-05 |
| 94466_f_at  | Cebpz               | CCAAT/enhancer binding protein      | 1337.23 | 544.96  | 2.45   | 4.41E-05 |
| 104408_s_at | Sox18               | SRY-box containing gene 18          | 82.21   | 228.02  | -2.77  | 4.42E-05 |
| 104082_at   | Rab12               | RAB12, member RAS oncogene fa       | 524.11  | 1250.59 | -2.39  | 4.46E-05 |
| 99115_at    | Uqcrh               | ubiquinol-cytochrome c reductas     | 322.63  | 2427.71 | -7.52  | 4.47E-05 |
| 93581_at    | Ndufb8              | NADH dehydrogenase (ubiquinor       | 354.40  | 3446.81 | -9.73  | 4.52E-05 |
| 94225_at    | Atg5                | autophagy-related 5 (yeast)         | 605.38  | 247.87  | 2.44   | 4.52E-05 |
| 98965_at    | Mboat5              | membrane bound O-acyltransfer       | 866.61  | 317.69  | 2.73   | 4.52E-05 |
| 101957_f_at | Parp1               | poly (ADP-ribose) polymerase far    | 1588.05 | 622.22  | 2.55   | 4.52E-05 |
| 98882_s_at  | Ndel1               | nuclear distribution gene E-like h  | 3378.52 | 1320.21 | 2.56   | 4.52E-05 |
| 97647_at    | LOC100039355 /// LC | ribosomal protein S16 /// similar   | 485.09  | 9190.93 | -18.95 | 4.53E-05 |
| 96832_at    | LOC635418 /// Slc39 | solute carrier family 39 (zinc tran | 244.08  | 653.89  | -2.68  | 4.53E-05 |
| 96340_at    | Tmem50b             | transmembrane protein 50B           | 5658.29 | 1158.88 | 4.88   | 4.54E-05 |
| 93550_at    | Csrp2               | cysteine and glycine-rich protein   | 127.11  | 492.00  | -3.87  | 4.57E-05 |
| 97164_at    | Rnaseh2b            | ribonuclease H2, subunit B          | 69.19   | 261.82  | -3.78  | 4.60E-05 |
| 94912_at    | Mrps21              | mitochondrial ribosomal protein     | 172.49  | 1149.41 | -6.66  | 4.62E-05 |
| 103234_at   | Nefh                | neurofilament, heavy polypeptid     | 8786.34 | 1106.50 | 7.94   | 4.62E-05 |
| 94209_g_at  | LOC100046302 /// Pc | protein disulfide isomerase assoc   | 65.24   | 277.69  | -4.26  | 4.63E-05 |
| 99149_at    | LOC630539 /// Trim5 | tripartite motif-containing 59 ///  | 61.67   | 184.52  | -2.99  | 4.63E-05 |
| 102691_at   | Zfp385a             | zinc finger protein 385A            | 527.14  | 1161.54 | -2.20  | 4.63E-05 |
| 160460_at   | Clpb                | ClpB caseinolytic peptidase B hor   | 904.54  | 358.15  | 2.53   | 4.67E-05 |
| 93013_at    | Id2                 | inhibitor of DNA binding 2          | 460.39  | 3236.45 | -7.03  | 4.67E-05 |
| 96876_at    | Laptm4a             | lysosomal-associated protein tra    | 2458.22 | 6067.05 | -2.47  | 4.68E-05 |
| 94322_at    | Sqle                | squalene epoxidase                  | 5175.58 | 2057.75 | 2.52   | 4.68E-05 |
| 99179_at    | Cuedc2              | CUE domain containing 2             | 2706.58 | 994.17  | 2.72   | 4.73E-05 |
| 103906_f_at | Nedd4l              | neural precursor cell expressed, c  | 2298.42 | 742.25  | 3.10   | 4.74E-05 |
| 102046_at   | Fusip1              | FUS interacting protein (serine-ar  | 167.99  | 434.51  | -2.59  | 4.74E-05 |
| 100046_at   | Mthfd2              | methylenetetrahydrofolate dehy      | 4001.94 | 798.69  | 5.01   | 4.75E-05 |
| 93319_at    | Rasa3               | RAS p21 protein activator 3         | 291.36  | 1152.39 | -3.96  | 4.76E-05 |
| 162237_f_at | Scg3                | Secretogranin III                   | 2400.30 | 1104.65 | 2.17   | 4.76E-05 |
| 98958_at    | Eny2                | enhancer of yellow 2 homolog (D     | 76.51   | 255.31  | -3.34  | 4.81E-05 |
| 93990_at    | Hnrph1              | heterogeneous nuclear ribonucle     | 830.45  | 2371.29 | -2.86  | 4.82E-05 |
| 94077_f_at  | Rpn2                | ribophorin II                       | 4670.98 | 1696.35 | 2.75   | 4.83E-05 |
| 94014_at    | Pomp                | proteasome maturation protein       | 269.60  | 659.50  | -2.45  | 4.84E-05 |
| 96294_s_at  | 2410015N17Rik       | RIKEN cDNA 2410015N17 gene          | 271.34  | 574.23  | -2.12  | 4.84E-05 |
| 102827_at   | Nek7                | NIMA (never in mitosis gene a)-re   | 6119.68 | 537.74  | 11.38  | 4.85E-05 |
| 92361_at    | Elavl4              | ELAV (embryonic lethal, abnorma     | 1230.77 | 561.16  | 2.19   | 4.88E-05 |
| 95490_at    | Kdelr1              | KDEL (Lys-Asp-Glu-Leu) endoplas     | 7814.40 | 2768.61 | 2.82   | 4.92E-05 |
| 93102_f_at  | Actg2               | actin, gamma 2, smooth muscle,      | 391.72  | 869.34  | -2.22  | 4.93E-05 |

|                 |                      |                                     |          |         |        |          |
|-----------------|----------------------|-------------------------------------|----------|---------|--------|----------|
| 93325_at        | Polr2e               | polymerase (RNA) II (DNA directe    | 52.68    | 367.69  | -6.98  | 4.93E-05 |
| 94813_at        | Gas1                 | growth arrest specific 1            | 283.99   | 1068.08 | -3.76  | 4.94E-05 |
| 101995_at       | Sqstm1               | sequestosome 1                      | 9090.17  | 1599.35 | 5.68   | 4.96E-05 |
| 99320_at        | St8sia5              | ST8 alpha-N-acetyl-neuraminide ;    | 448.46   | 991.83  | -2.21  | 4.97E-05 |
| 104682_at       | Tuba8                | tubulin, alpha 8                    | 723.20   | 1462.19 | -2.02  | 4.98E-05 |
| 98953_at        | Eif1b                | eukaryotic translation initiation f | 7026.03  | 2154.99 | 3.26   | 4.99E-05 |
| 99590_at        | LOC100040123 /// Rf  | ribosomal protein S17 /// similar   | 1323.38  | 3152.66 | -2.38  | 4.99E-05 |
| 103922_f_at     | Cyb5r1               | cytochrome b5 reductase 1           | 5305.88  | 139.58  | 38.01  | 4.99E-05 |
| 101976_at       | Cops4                | COP9 (constitutive photomorpho      | 2930.14  | 1230.98 | 2.38   | 4.99E-05 |
| 92782_at        | Tmpo                 | thymopoietin                        | 398.70   | 987.09  | -2.48  | 4.99E-05 |
| 103959_at       | Phf13                | PHD finger protein 13               | 639.88   | 152.69  | 4.19   | 4.99E-05 |
| 97818_at        | Snx4                 | sorting nexin 4                     | 3376.47  | 818.11  | 4.13   | 5.00E-05 |
| 103061_at       | Gad1                 | glutamic acid decarboxylase 1       | 73.62    | 2570.87 | -34.92 | 5.01E-05 |
| 97917_at        | Bloc1s1              | biogenesis of lysosome-related o    | 297.61   | 801.67  | -2.69  | 5.01E-05 |
| 103733_at       | 2900006A08Rik /// T: | RIKEN cDNA 2900006A08 gene //       | 154.29   | 314.82  | -2.04  | 5.03E-05 |
| 96852_at        | Prkar1a              | protein kinase, cAMP dependent      | 8258.64  | 3251.31 | 2.54   | 5.03E-05 |
| 96098_at        | Mrpl36               | mitochondrial ribosomal protein     | 348.88   | 135.04  | 2.58   | 5.06E-05 |
| 98099_at        | Nudt9                | nudix (nucleoside diphosphate lir   | 2024.71  | 234.49  | 8.63   | 5.09E-05 |
| 98841_at        | Acvr2a               | activin receptor IIA                | 252.49   | 104.09  | 2.43   | 5.13E-05 |
| 97458_at        | Gnb1                 | guanine nucleotide binding prote    | 11380.82 | 4530.61 | 2.51   | 5.26E-05 |
| 92577_f_at      | Rpl37                | ribosomal protein L37               | 2039.85  | 6825.88 | -3.35  | 5.27E-05 |
| 96156_at        | Snhg6                | small nucleolar RNA host gene (n    | 56.41    | 119.65  | -2.12  | 5.27E-05 |
| 161354_f_at     | 6330403K07Rik        | RIKEN cDNA 6330403K07 gene          | 1228.52  | 201.75  | 6.09   | 5.27E-05 |
| 93962_at        | Rap1a                | RAS-related protein-1a              | 1337.22  | 327.40  | 4.08   | 5.27E-05 |
| 97462_at        | Zfp706               | zinc finger protein 706             | 215.02   | 934.53  | -4.35  | 5.28E-05 |
| 160409_at       | Pitpna               | phosphatidylinositol transfer pro   | 1527.34  | 715.47  | 2.13   | 5.28E-05 |
| 160324_at       | Rpa3                 | replication protein A3              | 81.15    | 191.58  | -2.36  | 5.29E-05 |
| 95050_at        | Chordc1              | cysteine and histidine-rich domai   | 397.70   | 889.36  | -2.24  | 5.33E-05 |
| 162269_at       | Smyd2                | SET and MYND domain containin       | 676.57   | 148.64  | 4.55   | 5.35E-05 |
| 97118_at        | A630007B06Rik        | RIKEN cDNA A630007B06 gene          | 1491.36  | 581.75  | 2.56   | 5.36E-05 |
| 92847_s_at      | M6pr /// M6pr-ps     | mannose-6-phosphate receptor,       | 748.14   | 227.19  | 3.29   | 5.38E-05 |
| 103654_at       | Nsbp1                | nucleosome binding protein 1        | 445.83   | 934.23  | -2.10  | 5.42E-05 |
| 100915_at       | Myh9                 | myosin, heavy polypeptide 9, nor    | 5928.51  | 900.22  | 6.59   | 5.43E-05 |
| 96293_at        | 2410015N17Rik        | RIKEN cDNA 2410015N17 gene          | 445.34   | 965.40  | -2.17  | 5.51E-05 |
| 160961_at       | Sipa1l2              | signal-induced proliferation-asso   | 455.43   | 985.23  | -2.16  | 5.54E-05 |
| 97468_at        | Cks1b                | CDC28 protein kinase 1b             | 136.98   | 496.84  | -3.63  | 5.57E-05 |
| 95034_f_at      | Ipo4                 | importin 4                          | 1901.81  | 314.95  | 6.04   | 5.57E-05 |
| 100894_at       | Orc5l                | origin recognition complex, subu    | 701.90   | 229.97  | 3.05   | 5.59E-05 |
| 103674_f_at     | Eif2s3y              | eukaryotic translation initiation f | 38.17    | 166.09  | -4.35  | 5.59E-05 |
| 97770_s_at      | D6Wsu176e            | DNA segment, Chr 6, Wayne Stat      | 4076.72  | 882.53  | 4.62   | 5.60E-05 |
| 98623_g_at      | Igf2                 | insulin-like growth factor 2        | 1259.30  | 6859.62 | -5.45  | 5.61E-05 |
| 102850_at       | Tnk2                 | tyrosine kinase, non-receptor, 2    | 1508.12  | 462.21  | 3.26   | 5.61E-05 |
| 160696_at       | Tia1                 | cytotoxic granule-associated RNA    | 175.20   | 415.97  | -2.37  | 5.61E-05 |
| 104751_at       | Prph                 | peripherin                          | 3347.92  | 59.34   | 56.42  | 5.67E-05 |
| 161596_f_at     | Akap8                | A kinase (PRKA) anchor protein 8    | 220.56   | 470.70  | -2.13  | 5.67E-05 |
| AFFX-PyruCarbMu | Pcx                  | pyruvate carboxylase                | 205.04   | 463.60  | -2.26  | 5.69E-05 |
| 160530_at       | Ghitm                | growth hormone inducible transr     | 2165.28  | 610.34  | 3.55   | 5.75E-05 |
| 94206_at        | Grccl0               | gene rich cluster, C10 gene         | 1077.46  | 4614.71 | -4.28  | 5.76E-05 |
| 102128_f_at     | Mrps25               | mitochondrial ribosomal protein     | 2207.38  | 475.21  | 4.65   | 5.76E-05 |
| 98029_at        | 3110056O03Rik        | RIKEN cDNA 3110056O03 gene          | 318.19   | 639.36  | -2.01  | 5.83E-05 |
| 98464_at        | Ankrd40              | ankyrin repeat domain 40            | 1827.93  | 504.97  | 3.62   | 5.84E-05 |
| 93569_f_at      | 2610042L04Rik /// B: | RIKEN cDNA B930046C15 gene //       | 82.09    | 917.42  | -11.18 | 5.84E-05 |
| 104453_at       | LOC100044471 /// Sa  | SAP30-like /// similar to SAP30-lil | 1850.30  | 295.10  | 6.27   | 5.84E-05 |
| 95025_at        | D16H22S680E          | DNA segment, Chr 16, human D2       | 2542.00  | 434.88  | 5.85   | 5.84E-05 |
| 103930_at       | N4bp1                | NEDD4 binding protein 1             | 771.86   | 317.28  | 2.43   | 5.84E-05 |

|             |                     |                                     |         |         |        |          |
|-------------|---------------------|-------------------------------------|---------|---------|--------|----------|
| 104315_at   | Arhgap1             | Rho GTPase activating protein 1     | 968.50  | 207.15  | 4.68   | 5.84E-05 |
| 103793_at   | Mvp                 | major vault protein                 | 978.74  | 315.51  | 3.10   | 5.85E-05 |
| 99024_at    | Mxd4                | Max dimerization protein 4          | 533.30  | 1843.41 | -3.46  | 5.85E-05 |
| 96840_at    | Gabarapl2           | gamma-aminobutyric acid (GABA       | 1620.59 | 4158.23 | -2.57  | 5.86E-05 |
| 95095_at    | Flot1               | flotillin 1                         | 8133.08 | 1507.05 | 5.40   | 5.86E-05 |
| 100878_at   | LOC100047794        | similar to SG2NA beta               | 121.95  | 693.59  | -5.69  | 5.86E-05 |
| 95522_i_at  | Zfp68               | zinc finger protein 68              | 153.56  | 560.19  | -3.65  | 5.87E-05 |
| 93648_at    | Prkcc               | protein kinase C, gamma             | 328.33  | 791.15  | -2.41  | 5.87E-05 |
| 161444_f_at | Ints5               | integrator complex subunit 5        | 1428.78 | 466.92  | 3.06   | 5.91E-05 |
| 98876_at    | Mrpl11              | mitochondrial ribosomal protein     | 172.29  | 558.53  | -3.24  | 5.91E-05 |
| 93014_at    | Atp5l /// LOC100040 | ATP synthase, H+ transporting, m    | 398.92  | 6745.45 | -16.91 | 5.91E-05 |
| 93360_at    | Pmm1                | phosphomannomutase 1                | 2208.80 | 575.06  | 3.84   | 5.92E-05 |
| 102677_at   | Arhgdig             | Rho GDP dissociation inhibitor (G   | 568.01  | 115.07  | 4.94   | 5.92E-05 |
| 100729_at   | LOC100034726        | ribosomal protein L26 pseudoger     | 2218.36 | 5928.59 | -2.67  | 5.97E-05 |
| 102382_at   | Arntl               | aryl hydrocarbon receptor nuclea    | 131.33  | 390.98  | -2.98  | 5.97E-05 |
| 101973_at   | Cited2              | Cbp/p300-interacting transactiva    | 361.42  | 1512.19 | -4.18  | 5.98E-05 |
| 102933_at   | Plxna3              | plexin A3                           | 426.09  | 872.18  | -2.05  | 5.98E-05 |
| 94242_at    | Txndc17             | thioredoxin domain containing 17    | 948.32  | 458.86  | 2.07   | 6.00E-05 |
| 98602_at    | Rangap1             | RAN GTPase activating protein 1     | 8931.23 | 988.35  | 9.04   | 6.01E-05 |
| 94875_at    | Mrpl20              | mitochondrial ribosomal protein     | 195.21  | 490.06  | -2.51  | 6.01E-05 |
| 101525_at   | Ndufb10             | NADH dehydrogenase (ubiquinor       | 385.42  | 1603.81 | -4.16  | 6.03E-05 |
| 94259_at    | LOC100043508 /// LC | prostaglandin E synthase 3 (cytos   | 4656.52 | 1191.14 | 3.91   | 6.05E-05 |
| 100446_r_at | Sprr1b              | small proline-rich protein 1B       | 4056.04 | 8637.63 | -2.13  | 6.08E-05 |
| 94882_at    | Tmem30a             | transmembrane protein 30A           | 3881.79 | 995.85  | 3.90   | 6.08E-05 |
| 93320_at    | Cpt1a               | carnitine palmitoyltransferase 1a   | 2807.22 | 690.41  | 4.07   | 6.09E-05 |
| 102103_f_at | Glrx3               | glutaredoxin 3                      | 8787.51 | 3481.05 | 2.52   | 6.14E-05 |
| 160857_at   | Efnb2               | ephrin B2                           | 176.33  | 640.82  | -3.63  | 6.14E-05 |
| 103220_at   | Ndnf2               | necdin-like 2                       | 528.27  | 197.81  | 2.67   | 6.14E-05 |
| 98915_at    | Rnf149              | ring finger protein 149             | 472.80  | 234.25  | 2.02   | 6.15E-05 |
| 101420_at   | Slc32a1             | solute carrier family 32 (GABA ve   | 86.38   | 1184.14 | -13.71 | 6.15E-05 |
| 95614_at    | Cbx5                | chromobox homolog 5 (Drosophi       | 153.72  | 408.21  | -2.66  | 6.15E-05 |
| 93799_at    | Tmem199             | transmembrane protein 199           | 1265.27 | 465.31  | 2.72   | 6.16E-05 |
| 98015_at    | Scamp3              | secretory carrier membrane prot     | 2455.48 | 903.64  | 2.72   | 6.17E-05 |
| 160757_at   | Rnf38               | ring finger protein 38              | 1793.61 | 844.08  | 2.12   | 6.19E-05 |
| 100951_at   | Pkd2                | polycystic kidney disease 2         | 69.62   | 185.58  | -2.67  | 6.19E-05 |
| 101509_at   | Vbp1                | von Hippel-Lindau binding protei    | 417.36  | 2864.46 | -6.86  | 6.19E-05 |
| 92798_at    | Atp5c1              | ATP synthase, H+ transporting, m    | 1487.30 | 3493.14 | -2.35  | 6.20E-05 |
| 94831_at    | Ctsb                | cathepsin B                         | 6093.30 | 2180.26 | 2.79   | 6.20E-05 |
| 160289_s_at | Dlst                | dihydrolipoamide S-succinyltrans    | 148.53  | 403.59  | -2.72  | 6.20E-05 |
| 102105_f_at | Ptgds               | prostaglandin D2 synthase (brain    | 1312.35 | 8755.12 | -6.67  | 6.20E-05 |
| 93255_at    | Ralbp1              | ralA binding protein 1              | 3269.07 | 1103.41 | 2.96   | 6.20E-05 |
| 103438_at   | Dio2                | deiodinase, iodothyronine, type I   | 125.83  | 313.90  | -2.49  | 6.20E-05 |
| 93252_at    | Bcap31              | B-cell receptor-associated protei   | 3989.88 | 1525.69 | 2.62   | 6.20E-05 |
| 161965_r_at | Smarcd2             | SWI/SNF related, matrix associat    | 671.22  | 1534.87 | -2.29  | 6.21E-05 |
| 95142_s_at  | Capzb               | capping protein (actin filament) r  | 5580.78 | 1757.26 | 3.18   | 6.30E-05 |
| 93773_f_at  | Zranb2              | zinc finger, RAN-binding domain     | 3646.06 | 1642.48 | 2.22   | 6.35E-05 |
| 162481_f_at | Arrb1               | arrestin, beta 1                    | 3981.74 | 866.56  | 4.59   | 6.35E-05 |
| 95436_at    | Sst                 | somatostatin                        | 239.71  | 552.30  | -2.30  | 6.38E-05 |
| 161054_at   | Spock1              | sparc/osteonectin, cwcv and kaza    | 276.53  | 592.18  | -2.14  | 6.39E-05 |
| 160395_at   | Nudcd2              | NudC domain containing 2            | 132.16  | 475.66  | -3.60  | 6.44E-05 |
| 97385_at    | Nagk                | N-acetylglucosamine kinase          | 1349.28 | 465.87  | 2.90   | 6.48E-05 |
| 94256_at    | Clic4               | chloride intracellular channel 4 (r | 511.49  | 2051.54 | -4.01  | 6.49E-05 |
| 95456_r_at  | Shfm1               | split hand/foot malformation (ec    | 449.37  | 1215.40 | -2.70  | 6.50E-05 |
| 96664_at    | Huwe1               | HECT, UBA and WWE domain cor        | 2136.90 | 501.21  | 4.26   | 6.50E-05 |
| 92893_at    | Nfia                | nuclear factor I/A                  | 155.80  | 569.39  | -3.65  | 6.56E-05 |

|             |                      |                                          |          |         |        |          |
|-------------|----------------------|------------------------------------------|----------|---------|--------|----------|
| 103010_at   | 6820431F20Rik        | RIKEN cDNA 6820431F20 gene               | 1674.96  | 387.56  | 4.32   | 6.59E-05 |
| 92623_at    | Csde1                | cold shock domain containing E1,         | 10340.14 | 4324.73 | 2.39   | 6.59E-05 |
| 100899_s_at | Zbtb22               | zinc finger and BTB domain conta         | 1790.86  | 790.79  | 2.26   | 6.60E-05 |
| 93104_at    | Btg1 /// LOC1000473  | B-cell translocation gene 1, anti- $\mu$ | 287.35   | 1228.74 | -4.28  | 6.60E-05 |
| 160450_at   | Maea                 | macrophage erythroblast attachme         | 4865.08  | 1466.17 | 3.32   | 6.60E-05 |
| 97463_g_at  | Zfp706               | zinc finger protein 706                  | 987.91   | 2563.55 | -2.59  | 6.65E-05 |
| 98946_at    | Wsb1                 | WD repeat and SOCS box-containi          | 81.57    | 293.70  | -3.60  | 6.65E-05 |
| 98446_s_at  | Cct3                 | chaperonin subunit 3 (gamma)             | 210.93   | 1261.33 | -5.98  | 6.67E-05 |
| 104209_at   | Cyhr1                | cysteine and histidine rich 1            | 985.84   | 371.93  | 2.65   | 6.67E-05 |
| 103251_at   | Cdadc1               | cytidine and dCMP deaminase dc           | 822.64   | 198.85  | 4.14   | 6.72E-05 |
| 161997_f_at | ---                  | ---                                      | 572.52   | 66.11   | 8.66   | 6.72E-05 |
| 161524_r_at | Gpi1                 | glucose phosphate isomerase 1            | 201.52   | 423.90  | -2.10  | 6.72E-05 |
| 99668_at    | Bin1                 | bridging integrator 1                    | 8456.11  | 2228.29 | 3.79   | 6.73E-05 |
| 160448_at   | Pdcd2l               | programmed cell death 2-like             | 603.93   | 1408.65 | -2.33  | 6.73E-05 |
| 93724_at    | Ror2                 | receptor tyrosine kinase-like orpl       | 472.03   | 91.67   | 5.15   | 6.73E-05 |
| 98104_at    | Atp6v0b              | ATPase, H+ transporting, lysosom         | 290.84   | 2851.43 | -9.80  | 6.73E-05 |
| 92636_f_at  | LOC100042561 /// LC  | SEC61, gamma subunit /// simila          | 115.84   | 1554.61 | -13.42 | 6.75E-05 |
| 96359_at    | Hdlbp                | high density lipoprotein (HDL) bir       | 4432.60  | 1728.54 | 2.56   | 6.81E-05 |
| 94296_s_at  | Gtf2i                | general transcription factor II I        | 308.55   | 910.65  | -2.95  | 6.82E-05 |
| 93711_at    | Sec23a               | SEC23A (S. cerevisiae)                   | 96.49    | 288.67  | -2.99  | 6.88E-05 |
| 95040_at    | Pdcd6ip              | programmed cell death 6 interac          | 660.16   | 160.02  | 4.13   | 6.90E-05 |
| 104738_at   | Dnajc2               | DnaJ (Hsp40) homolog, subfamily          | 2050.22  | 513.69  | 3.99   | 6.99E-05 |
| 104059_at   | Chd8                 | chromodomain helicase DNA bin            | 1468.75  | 269.80  | 5.44   | 6.99E-05 |
| 104275_g_at | Trp53                | transformation related protein 5:        | 256.85   | 514.35  | -2.00  | 7.04E-05 |
| 161980_f_at | Bag3                 | Bcl2-associated athanogene 3             | 5657.45  | 40.09   | 141.12 | 7.06E-05 |
| 93021_at    | Bex4 /// LOC1000432  | brain expressed gene 4 /// simila        | 590.53   | 2170.10 | -3.67  | 7.06E-05 |
| 101017_at   | Cdk4                 | cyclin-dependent kinase 4                | 86.28    | 312.40  | -3.62  | 7.10E-05 |
| 103430_at   | Dbn1                 | drebrin 1                                | 1120.81  | 183.31  | 6.11   | 7.11E-05 |
| 98037_at    | Hbxip                | hepatitis B virus x interacting pro      | 219.67   | 744.49  | -3.39  | 7.17E-05 |
| 100472_at   | Enah                 | enabled homolog (Drosophila)             | 2163.23  | 338.69  | 6.39   | 7.22E-05 |
| 99599_s_at  | Ptov1                | prostate tumor over expressed g          | 9945.93  | 2119.86 | 4.69   | 7.22E-05 |
| 94908_r_at  | 1110001J03Rik        | RIKEN cDNA 1110001J03 gene               | 340.53   | 1850.81 | -5.44  | 7.23E-05 |
| 93011_at    | Gabarapl1            | gamma-aminobutyric acid (GABA            | 8566.36  | 1914.43 | 4.47   | 7.23E-05 |
| 100758_at   | LOC100040426 /// LC  | ribosomal protein S28 /// similar        | 508.04   | 9455.29 | -18.61 | 7.24E-05 |
| 96298_f_at  | Dynll1               | dynein light chain LC8-type 1            | 3410.56  | 7891.36 | -2.31  | 7.24E-05 |
| 96113_at    | Txnl4a               | thioredoxin-like 4A                      | 4886.63  | 1470.54 | 3.32   | 7.31E-05 |
| 96767_at    | Mbc2                 | membrane bound C2 domain cor             | 3571.34  | 677.84  | 5.27   | 7.35E-05 |
| 160630_at   | LOC671878 /// Sms    | spermine synthase /// similar to :       | 1421.58  | 412.89  | 3.44   | 7.36E-05 |
| 161109_at   | 1810013L24Rik        | RIKEN cDNA 1810013L24 gene               | 491.68   | 174.44  | 2.82   | 7.38E-05 |
| 96306_at    | Polr2i               | polymerase (RNA) II (DNA directe         | 246.72   | 637.48  | -2.58  | 7.39E-05 |
| 100948_at   | Ank                  | progressive ankylosis                    | 2473.96  | 951.91  | 2.60   | 7.41E-05 |
| 161698_f_at | Mtap7d1              | microtubule-associated protein 7         | 5669.14  | 2080.26 | 2.73   | 7.42E-05 |
| 102936_at   | B4galt6 /// LOC6757C | UDP-Gal:betaGlcNAc beta 1,4-gal          | 1628.06  | 385.59  | 4.22   | 7.42E-05 |
| 92802_s_at  | Plp1                 | proteolipid protein (myelin) 1           | 778.05   | 8659.60 | -11.13 | 7.42E-05 |
| 103956_at   | Azi1                 | 5-azacytidine induced gene 1             | 928.20   | 398.80  | 2.33   | 7.42E-05 |
| 160531_at   | Emg1                 | EMG1 nucleolar protein homolog           | 193.69   | 706.80  | -3.65  | 7.53E-05 |
| 101367_at   | Dctn1                | dynactin 1                               | 766.40   | 1547.76 | -2.02  | 7.56E-05 |
| 95657_f_at  | D13Wsu177e           | DNA segment, Chr 13, Wayne Sta           | 2798.46  | 702.95  | 3.98   | 7.56E-05 |
| 94109_at    | Zfp281               | zinc finger protein 281                  | 253.73   | 853.57  | -3.36  | 7.59E-05 |
| 100979_at   | Rnf138               | ring finger protein 138                  | 53.16    | 392.49  | -7.38  | 7.60E-05 |
| 96885_at    | Nt5dc2               | 5'-nucleotidase domain containir         | 211.41   | 1686.83 | -7.98  | 7.67E-05 |
| 160394_at   | Ttc15                | tetratricopeptide repeat domain          | 1352.09  | 254.52  | 5.31   | 7.69E-05 |
| 102402_at   | Gbas                 | glioblastoma amplified sequence          | 4093.78  | 1967.98 | 2.08   | 7.69E-05 |
| 104713_at   | Prpf38a              | PRP38 pre-mRNA processing fact           | 274.09   | 585.97  | -2.14  | 7.69E-05 |
| 161808_f_at | Evl /// LOC10004733: | Ena-vasodilator stimulated phos $\phi$   | 1759.69  | 531.77  | 3.31   | 7.69E-05 |

|                      |                          |                                                                     |         |          |        |          |
|----------------------|--------------------------|---------------------------------------------------------------------|---------|----------|--------|----------|
| 97058_f_at           | Rab33b                   | RAB33B, member of RAS oncogene                                      | 2894.98 | 812.94   | 3.56   | 7.70E-05 |
| 100910_at            | Surf2                    | surfeit gene 2                                                      | 2449.60 | 1219.55  | 2.01   | 7.70E-05 |
| 100130_at            | Jun                      | Jun oncogene                                                        | 1816.15 | 562.66   | 3.23   | 7.72E-05 |
| 160973_at            | C330027C09Rik            | RIKEN cDNA C330027C09 gene                                          | 33.43   | 112.38   | -3.36  | 7.76E-05 |
| AFFX-b-ActinMur/Actb |                          | actin, beta, cytoplasmic                                            | 419.25  | 10772.16 | -25.69 | 7.77E-05 |
| 96329_at             | Puf60                    | poly-U binding splicing factor 60                                   | 343.27  | 1016.61  | -2.96  | 7.83E-05 |
| 96746_at             | Dlat                     | dihydrolipoamide S-acetyltransferase                                | 755.40  | 321.48   | 2.35   | 7.84E-05 |
| 162260_at            | 6330407G11Rik            | RIKEN cDNA 6330407G11 gene                                          | 714.86  | 308.51   | 2.32   | 7.93E-05 |
| 93092_at             | H2-DMa                   | histocompatibility 2, class II, locus D                             | 1447.64 | 694.72   | 2.08   | 7.97E-05 |
| 104735_at            | Kctd12                   | potassium channel tetramerization domain containing 12              | 41.58   | 1376.92  | -33.11 | 7.99E-05 |
| 104474_s_at          | Oprl1                    | opioid receptor-like 1                                              | 192.28  | 391.31   | -2.04  | 7.99E-05 |
| 100124_r_at          | Itgb1                    | integrin beta 1 (fibronectin receptor 1)                            | 2311.68 | 937.34   | 2.47   | 8.00E-05 |
| 100547_at            | Rbm4b                    | RNA binding motif protein 4B                                        | 504.90  | 1037.87  | -2.06  | 8.10E-05 |
| 160170_at            | Stmn3                    | stathmin-like 3                                                     | 3830.24 | 1910.16  | 2.01   | 8.10E-05 |
| 95049_at             | Snrpd2                   | small nuclear ribonucleoprotein D2                                  | 446.44  | 3435.34  | -7.70  | 8.10E-05 |
| 162457_f_at          | Hba-a1 /// Hba-a2        | hemoglobin alpha, adult chain 1, beta chain                         | 925.61  | 5141.77  | -5.56  | 8.15E-05 |
| 94805_f_at           | Hist1h2ab /// Hist1h2af  | histone H2A family class b member 2, tripartite motif-containing 17 | 544.33  | 7043.65  | -12.94 | 8.19E-05 |
| 161891_r_at          | ---                      | ---                                                                 | 100.33  | 219.99   | -2.19  | 8.21E-05 |
| 95571_at             | Slc30a4                  | solute carrier family 30 (zinc transporters) member 4               | 183.32  | 495.74   | -2.70  | 8.21E-05 |
| 96682_at             | St6galnac4               | ST6 (alpha-N-acetylneuraminyltransferase 4)                         | 579.47  | 1267.62  | -2.19  | 8.24E-05 |
| 100465_i_at          | Gm1673                   | gene model 1673, (NCBI)                                             | 1240.62 | 3999.56  | -3.22  | 8.24E-05 |
| 104122_at            | D330001F17Rik            | RIKEN cDNA D330001F17 gene                                          | 1884.31 | 838.96   | 2.25   | 8.24E-05 |
| 101971_at            | Rnf181                   | ring finger protein 181                                             | 3425.78 | 1225.25  | 2.80   | 8.25E-05 |
| 160240_at            | 1110003E01Rik            | RIKEN cDNA 1110003E01 gene                                          | 3985.89 | 865.61   | 4.60   | 8.25E-05 |
| 93277_at             | Hspd1                    | heat shock protein 1 (chaperonin 10.1)                              | 6689.37 | 2391.53  | 2.80   | 8.25E-05 |
| 99466_at             | Zfp444                   | zinc finger protein 444                                             | 128.93  | 280.18   | -2.17  | 8.39E-05 |
| 160287_at            | Map1lc3b                 | microtubule-associated protein 1 light chain 3 beta                 | 275.91  | 710.22   | -2.57  | 8.41E-05 |
| 103441_at            | Csnk2a1 /// LOC100025001 | casein kinase 2, alpha 1 polypeptide                                | 1517.56 | 558.06   | 2.72   | 8.43E-05 |
| 100928_at            | Fbln2                    | fibulin 2                                                           | 1726.85 | 235.14   | 7.34   | 8.43E-05 |
| 160750_at            | Prpsap2                  | phosphoribosyl pyrophosphate synthetase 2                           | 128.26  | 423.74   | -3.30  | 8.45E-05 |
| 99618_at             | Uqcr                     | ubiquinol-cytochrome c reductase core protein                       | 331.36  | 3543.20  | -10.69 | 8.46E-05 |
| 96858_at             | Aifm1                    | apoptosis-inducing factor, mitochondrial                            | 3203.39 | 858.83   | 3.73   | 8.46E-05 |
| 94068_at             | Rps19                    | ribosomal protein S19                                               | 680.12  | 1720.34  | -2.53  | 8.46E-05 |
| 99546_at             | Fkbp2                    | FK506 binding protein 2                                             | 458.35  | 2177.91  | -4.75  | 8.46E-05 |
| 94853_at             | Gnb1                     | guanine nucleotide binding protein (G protein)-alpha 1              | 378.12  | 1094.86  | -2.90  | 8.48E-05 |
| 96874_g_at           | Tax1bp1                  | Tax1 (human T-cell leukemia virus type 1) binding protein 1         | 7001.45 | 2475.49  | 2.83   | 8.51E-05 |
| 102307_at            | Dcx                      | doublecortin                                                        | 227.98  | 2322.48  | -10.19 | 8.52E-05 |
| 97865_g_at           | 2510049I19Rik            | RIKEN cDNA 2510049I19 gene                                          | 276.52  | 842.55   | -3.05  | 8.55E-05 |
| 96962_at             | Rpl6                     | ribosomal protein L6                                                | 3239.88 | 8014.94  | -2.47  | 8.55E-05 |
| 92673_at             | Sh3gl2                   | SH3-domain GRB2-like 2                                              | 65.02   | 245.60   | -3.78  | 8.59E-05 |
| 96861_at             | Mrpl50                   | mitochondrial ribosomal protein L50                                 | 114.47  | 280.88   | -2.45  | 8.61E-05 |
| 102946_r_at          | Gapdhs                   | glyceraldehyde-3-phosphate dehydrogenase (cytosolic)                | 939.70  | 2367.90  | -2.52  | 8.64E-05 |
| 95482_at             | Usp7                     | ubiquitin specific peptidase 7                                      | 2295.81 | 630.85   | 3.64   | 8.71E-05 |
| 104404_at            | Nat12                    | N-acetyltransferase 12                                              | 53.33   | 145.21   | -2.72  | 8.71E-05 |
| 97197_r_at           | AI506816                 | expressed sequence AI506816                                         | 44.27   | 392.52   | -8.87  | 8.71E-05 |
| 162081_f_at          | ---                      | ---                                                                 | 3282.10 | 1091.59  | 3.01   | 8.71E-05 |
| 104208_at            | Pi4ka                    | phosphatidylinositol 4-kinase, class I                              | 3353.42 | 751.33   | 4.46   | 8.71E-05 |
| 94260_at             | Larp1                    | La ribonucleoprotein domain family class 1 member 1                 | 3388.62 | 1027.84  | 3.30   | 8.72E-05 |
| 101085_at            | Mrps24                   | mitochondrial ribosomal protein S24                                 | 270.97  | 584.33   | -2.16  | 8.72E-05 |
| 103891_i_at          | Ell2                     | elongation factor RNA polymerase II                                 | 1166.98 | 273.67   | 4.26   | 8.72E-05 |
| 99119_at             | Cfl1                     | cofilin 1, non-muscle                                               | 964.82  | 4095.26  | -4.24  | 8.73E-05 |
| 104432_at            | Rnd2                     | Rho family GTPase 2                                                 | 212.35  | 1631.49  | -7.68  | 8.74E-05 |
| 161696_f_at          | C77080                   | expressed sequence C77080                                           | 1425.49 | 143.59   | 9.93   | 8.82E-05 |
| 94393_r_at           | Elovl2                   | elongation of very long chain fatty acid synthase 2                 | 64.47   | 250.62   | -3.89  | 8.82E-05 |
| 93023_f_at           | Hist1h3a /// Hist1h3h    | histone cluster 2, H3c1 /// histone H3.1                            | 230.65  | 483.86   | -2.10  | 8.88E-05 |



|             |                     |                                    |         |         |        |            |
|-------------|---------------------|------------------------------------|---------|---------|--------|------------|
| 101527_at   | Tcea1               | transcription elongation factor A  | 576.87  | 1330.00 | -2.31  | 8.91E-05   |
| 160558_at   | Akt2 /// LOC1000481 | thymoma viral proto-oncogene 2     | 672.29  | 1379.12 | -2.05  | 8.91E-05   |
| 95730_at    | Mrps34              | mitochondrial ribosomal protein    | 202.83  | 465.88  | -2.30  | 8.93E-05   |
| 160402_at   | Tceb2               | transcription elongation factor B  | 356.24  | 6707.30 | -18.83 | 8.94E-05   |
| 97868_at    | Dnaja3              | DnaJ (Hsp40) homolog, subfamily    | 3021.72 | 1239.44 | 2.44   | 8.99E-05   |
| 96909_at    | Ndufab1             | NADH dehydrogenase (ubiquinor      | 305.70  | 1944.46 | -6.36  | 8.99E-05   |
| 94768_at    | Rad21               | RAD21 homolog (S. pombe)           | 669.71  | 1908.01 | -2.85  | 9.00E-05   |
| 103247_at   | Mpp3                | membrane protein, palmitoylate     | 452.96  | 1326.43 | -2.93  | 9.00E-05   |
| 94207_at    | Pdia6               | protein disulfide isomerase assoc  | 1653.65 | 352.12  | 4.70   | 9.00E-05   |
| 93635_at    | Kif3c               | kinesin family member 3C           | 2111.29 | 544.06  | 3.88   | 9.01E-05   |
| 160899_at   | Pcp4                | Purkinje cell protein 4            | 1120.54 | 5742.20 | -5.12  | 9.02E-05   |
| 98587_at    | Nap111              | nucleosome assembly protein 1-l    | 439.62  | 922.67  | -2.10  | 9.02E-05   |
| 94564_at    | Sult4a1             | sulfotransferase family 4A, memt   | 397.94  | 1077.16 | -2.71  | 9.03E-05   |
| 104557_at   | Pitpnb              | phosphatidylinositol transfer pro  | 184.99  | 657.01  | -3.55  | 9.04E-05   |
| 96628_at    | Eprs                | glutamyl-prolyl-tRNA synthetase    | 2226.83 | 448.22  | 4.97   | 9.06E-05   |
| 160114_at   | Gdi2                | guanosine diphosphate (GDP) dis    | 4641.98 | 1947.86 | 2.38   | 9.09E-05   |
| 102813_f_at | Uba5                | ubiquitin-like modifier activating | 906.27  | 280.02  | 3.24   | 9.09E-05   |
| 93273_at    | Snca                | synuclein, alpha                   | 221.73  | 723.78  | -3.26  | 9.15E-05   |
| 95801_s_at  | Zfp260              | zinc finger protein 260            | 46.80   | 108.20  | -2.31  | 9.29E-05   |
| 93284_at    | Cirbp               | cold inducible RNA binding prote   | 501.49  | 1529.30 | -3.05  | 9.31E-05   |
| 103364_f_at | 5730494M16Rik       | RIKEN cDNA 5730494M16 gene         | 4585.36 | 1705.47 | 2.69   | 9.37E-05   |
| 96596_at    | Ndrp1               | N-myc downstream regulated ge      | 4849.37 | 462.52  | 10.48  | 9.51E-05   |
| 95512_at    | Pcmt1               | protein-L-isoaspartate (D-asparta  | 1184.94 | 257.14  | 4.61   | 9.51E-05   |
| 92794_f_at  | Nme1                | non-metastatic cells 1, protein (N | 1829.05 | 454.09  | 4.03   | 9.55E-05   |
| 95718_f_at  | Usmg5               | upregulated during skeletal musc   | 2281.65 | 8309.76 | -3.64  | 9.56E-05   |
| 96913_at    | Hadhb               | hydroxyacyl-Coenzyme A dehydr      | 2407.09 | 738.26  | 3.26   | 9.58E-05   |
| 92806_at    | Pdrg1               | p53 and DNA damage regulated :     | 2252.86 | 792.25  | 2.84   | 9.58E-05   |
| 160764_at   | Fbxw11              | F-box and WD-40 domain proteir     | 2785.27 | 1103.77 | 2.52   | 9.58E-05   |
| 161948_f_at | ---                 | ---                                | 365.59  | 128.66  | 2.84   | 9.58E-05   |
| 102967_at   | Gdap1               | ganglioside-induced differentiat   | 4096.32 | 1053.02 | 3.89   | 9.58E-05   |
| 95117_at    | Igf2r               | insulin-like growth factor 2 recep | 2032.71 | 736.35  | 2.76   | 9.59E-05   |
| 102056_f_at | 2610002J02Rik       | RIKEN cDNA 2610002J02 gene         | 6175.35 | 728.63  | 8.48   | 9.62E-05   |
| 160988_r_at | Fubp1               | far upstream element (FUSE) bin    | 55.78   | 116.02  | -2.08  | 9.71E-05   |
| 101770_i_at | LOC634282 /// Pcdha | protocadherin alpha 4 /// protoc   | 169.58  | 80.63   | 2.10   | 9.74E-05   |
| 96132_at    | Apcdd1              | adenomatosis polyposis coli dow    | 141.98  | 663.87  | -4.68  | 9.75E-05   |
| 95634_at    | 0610010K14Rik       | RIKEN cDNA 0610010K14 gene         | 83.52   | 280.23  | -3.36  | 9.75E-05   |
| 160561_at   | Mdk                 | midkine                            | 458.84  | 1596.89 | -3.48  | 9.86E-05   |
| 96496_g_at  | Myt1l               | myelin transcription factor 1-like | 2133.17 | 537.00  | 3.97   | 9.87E-05   |
| 93875_at    | Hspa1a              | heat shock protein 1A              | 1715.51 | 353.54  | 4.85   | 9.87E-05   |
| 94550_at    | Snx1                | sorting nexin 1                    | 2089.45 | 934.60  | 2.24   | 9.87E-05   |
| 162032_f_at | LOC625174 /// Pkm2  | pyruvate kinase, muscle /// simil  | 4996.56 | 2423.79 | 2.06   | 9.93E-05   |
| 103303_at   | Chd7                | chromodomain helicase DNA bin      | 109.08  | 500.18  | -4.59  | 9.93E-05   |
| 93571_at    | Spnb2               | spectrin beta 2                    | 7150.41 | 3173.38 | 2.25   | 9.93E-05   |
| 98081_at    | LOC100039220 /// Rf | RNA polymerase 1-3 /// similar tr  | 93.94   | 258.27  | -2.75  | 9.94E-05   |
| 100600_at   | Cd24a /// EG621324  | CD24a antigen /// predicted gene   | 9566.85 | 2791.73 | 3.43   | 9.94E-05   |
| 100133_at   | Fyn                 | Fyn proto-oncogene                 | 559.68  | 2077.02 | -3.71  | 0.00010007 |
| 99604_at    | 5-Mar               | membrane-associated ring finger    | 2884.55 | 729.52  | 3.95   | 0.00010016 |
| 95670_at    | Stmn2               | stathmin-like 2                    | 9519.99 | 4415.76 | 2.16   | 0.00010029 |
| 103557_at   | Vps37c              | vacuolar protein sorting 37C (yea  | 2423.51 | 582.17  | 4.16   | 0.00010049 |
| 93427_at    | Myo1d               | myosin ID                          | 349.27  | 109.75  | 3.18   | 0.00010151 |
| 96297_at    | Ebna1bp2            | EBNA1 binding protein 2            | 69.16   | 157.70  | -2.28  | 0.00010158 |
| 98575_at    | Fasn                | fatty acid synthase                | 4671.29 | 1608.84 | 2.90   | 0.00010183 |
| 99335_at    | Hk1                 | hexokinase 1                       | 492.13  | 1747.68 | -3.55  | 0.00010188 |
| 95358_at    | Pip4k2a             | phosphatidylinositol-5-phosphat    | 2032.35 | 469.10  | 4.33   | 0.00010202 |
| 96016_at    | 2700094K13Rik       | RIKEN cDNA 2700094K13 gene         | 545.39  | 2742.48 | -5.03  | 0.00010236 |

|             |                                                   |                                     |          |         |        |            |
|-------------|---------------------------------------------------|-------------------------------------|----------|---------|--------|------------|
| 100560_at   | Pafah1b1                                          | platelet-activating factor acetylhy | 5848.69  | 2170.19 | 2.70   | 0.00010236 |
| 100927_at   | Pltp                                              | phospholipid transfer protein       | 204.52   | 886.99  | -4.34  | 0.00010245 |
| 103001_at   | Vegfb                                             | vascular endothelial growth factc   | 1808.65  | 810.06  | 2.23   | 0.000103   |
| 94915_at    | Ppib                                              | peptidylprolyl isomerase B          | 990.63   | 2271.73 | -2.29  | 0.00010308 |
| 160794_at   | Smyd2                                             | SET and MYND domain containin       | 1781.00  | 546.07  | 3.26   | 0.00010309 |
| 100470_at   | Mapk10                                            | mitogen-activated protein kinase    | 3657.44  | 1010.66 | 3.62   | 0.00010315 |
| 104343_f_at | Pla2g12a                                          | phospholipase A2, group XIIA        | 9340.42  | 818.36  | 11.41  | 0.00010315 |
| 102780_at   | Srxn1                                             | sulfiredoxin 1 homolog (S. cerevi:  | 3355.16  | 252.22  | 13.30  | 0.0001032  |
| 99578_at    | Top2a                                             | topoisomerase (DNA) II alpha        | 90.11    | 220.19  | -2.44  | 0.00010454 |
| 104532_at   | Tomm34                                            | translocase of outer mitochondri    | 5038.76  | 2400.88 | 2.10   | 0.00010567 |
| 92546_r_at  | Ptgds                                             | prostaglandin D2 synthase (brain    | 340.26   | 3638.06 | -10.69 | 0.00010571 |
| 97262_at    | Csnk1d                                            | casein kinase 1, delta              | 5891.99  | 1379.90 | 4.27   | 0.00010572 |
| 95472_f_at  | Uqcrb                                             | ubiquinol-cytochrome c reductas     | 700.61   | 3310.81 | -4.73  | 0.00010586 |
| 160556_at   | 1810020G14Rik                                     | RIKEN cDNA 1810020G14 gene          | 261.44   | 547.28  | -2.09  | 0.00010609 |
| 102338_at   | Pde9a                                             | phosphodiesterase 9A                | 60.22    | 159.31  | -2.65  | 0.00010633 |
| 93281_at    | Rcn2                                              | reticulocalbin 2                    | 113.14   | 526.80  | -4.66  | 0.00010649 |
| 95064_at    | Acaa2                                             | acetyl-Coenzyme A acyltransfera:    | 5440.24  | 1313.24 | 4.14   | 0.00010701 |
| 98909_at    | Lias                                              | lipoic acid synthetase              | 1603.56  | 521.12  | 3.08   | 0.00010743 |
| 92379_f_at  | Ptprz1                                            | protein tyrosine phosphatase, re    | 85.00    | 883.27  | -10.39 | 0.00010754 |
| 160511_at   | Cxcl12                                            | chemokine (C-X-C motif) ligand 1    | 28.24    | 145.86  | -5.17  | 0.00010754 |
| 101082_at   | Me1                                               | malic enzyme 1, NADP(+)-depend      | 2526.51  | 380.65  | 6.64   | 0.00010797 |
| 100958_at   | Spata13                                           | spermatogenesis associated 13       | 3314.14  | 851.33  | 3.89   | 0.00010822 |
| 160079_i_at | LOC100044766 /// W WW domain containing adaptor v |                                     | 544.62   | 198.84  | 2.74   | 0.00010907 |
| 98905_at    | 7-Sep septin 7                                    |                                     | 570.60   | 4420.76 | -7.75  | 0.00010952 |
| 161400_f_at | Rpn1                                              | ribophorin I                        | 2241.95  | 1035.87 | 2.16   | 0.00010959 |
| 97705_at    | Snappc3                                           | small nuclear RNA activating com    | 112.79   | 254.56  | -2.26  | 0.00011026 |
| 103248_at   | Fkbp1b                                            | FK506 binding protein 1b            | 11135.94 | 2470.10 | 4.51   | 0.00011087 |
| 103842_at   | Ddx3y                                             | DEAD (Asp-Glu-Ala-Asp) box poly     | 33.63    | 176.26  | -5.24  | 0.00011112 |
| 100457_at   | Glg1                                              | golgi apparatus protein 1           | 2383.31  | 490.67  | 4.86   | 0.00011114 |
| 104229_at   | Nkain1                                            | Na+/K+ transporting ATPase inte     | 144.64   | 1091.28 | -7.54  | 0.00011112 |
| 101997_at   | Atg12                                             | autophagy-related 12 (yeast)        | 4012.19  | 1043.40 | 3.85   | 0.00011112 |
| 92265_f_at  | Trove2                                            | TROVE domain family, member 2       | 936.65   | 249.21  | 3.76   | 0.00011127 |
| 160860_at   | Gdf10                                             | growth differentiation factor 10    | 127.19   | 1257.50 | -9.89  | 0.00011163 |
| 94345_at    | Il6st                                             | interleukin 6 signal transducer     | 1321.38  | 210.08  | 6.29   | 0.00011176 |
| 161294_f_at | Clu                                               | clusterin                           | 2331.20  | 962.47  | 2.42   | 0.00011181 |
| 96311_at    | Mbp                                               | myelin basic protein                | 1204.72  | 6326.72 | -5.25  | 0.00011196 |
| 160933_at   | Igtp                                              | interferon gamma induced GTPas      | 360.53   | 96.08   | 3.75   | 0.000112   |
| 101030_at   | Rhob                                              | ras homolog gene family, membe      | 936.04   | 2878.32 | -3.08  | 0.00011212 |
| 160183_f_at | Tmed7                                             | transmembrane emp24 protein t       | 960.37   | 3812.27 | -3.97  | 0.00011236 |
| 94432_at    | St6gal1                                           | beta galactoside alpha 2,6 sialyltr | 1090.21  | 257.61  | 4.23   | 0.00011281 |
| 102752_at   | Cyfp1                                             | cytoplasmic FMR1 interacting prc    | 2318.10  | 711.17  | 3.26   | 0.00011292 |
| 101467_at   | S100b                                             | S100 protein, beta polypeptide, r   | 2231.79  | 409.59  | 5.45   | 0.00011296 |
| 104279_at   | Polr2f                                            | polymerase (RNA) II (DNA directe    | 527.36   | 1615.87 | -3.06  | 0.00011297 |
| 93967_at    | Anapc11                                           | anaphase promoting complex sul      | 4643.16  | 1700.40 | 2.73   | 0.00011309 |
| 104260_at   | AW112037 /// Lpgat1 expressed sequence AW112037 / |                                     | 2291.92  | 793.75  | 2.89   | 0.00011363 |
| 102059_at   | Nicn1                                             | nicolin 1                           | 2726.29  | 847.44  | 3.22   | 0.00011379 |
| 162499_f_at | Ube2d2                                            | ubiquitin-conjugating enzyme E2     | 1319.07  | 351.83  | 3.75   | 0.00011382 |
| 100976_at   | Ptpn9                                             | protein tyrosine phosphatase, no    | 5458.74  | 1360.15 | 4.01   | 0.00011388 |
| 160683_at   | Slc25a36                                          | solute carrier family 25, member    | 3257.33  | 1393.11 | 2.34   | 0.00011402 |
| 93983_at    | Der1                                              | Der1-like domain family, membe      | 1466.37  | 609.66  | 2.41   | 0.00011478 |
| 103362_at   | Ptger4                                            | prostaglandin E receptor 4 (subty   | 1533.38  | 150.99  | 10.16  | 0.00011499 |
| 97535_at    | Ywhah                                             | tyrosine 3-monooxygenase/trypt      | 6588.06  | 2756.99 | 2.39   | 0.00011509 |
| 96797_s_at  | Fbxw5                                             | F-box and WD-40 domain proteir      | 2310.80  | 1116.25 | 2.07   | 0.00011544 |
| 103899_at   | Atp11a                                            | ATPase, class VI, type 11A          | 2001.69  | 172.94  | 11.57  | 0.00011568 |
| 95076_at    | 1500032L24Rik                                     | RIKEN cDNA 1500032L24 gene          | 1574.50  | 3609.83 | -2.29  | 0.00011572 |

|             |                     |                                                                                 |         |         |        |            |
|-------------|---------------------|---------------------------------------------------------------------------------|---------|---------|--------|------------|
| 103611_at   | Cd47                | CD47 antigen (Rh-related antigen)                                               | 8959.80 | 3913.12 | 2.29   | 0.00011573 |
| 100527_at   | Ccdc56              | coiled-coil domain containing 56                                                | 689.43  | 1597.43 | -2.32  | 0.00011592 |
| 160925_at   | Nras                | neuroblastoma ras oncogene                                                      | 2097.99 | 334.16  | 6.28   | 0.00011663 |
| 98451_at    | Dnajb10             | DnaJ (Hsp40) homolog, subfamily                                                 | 1454.36 | 230.88  | 6.30   | 0.00011672 |
| 95707_at    | 2900010M23Rik       | RIKEN cDNA 2900010M23 gene                                                      | 447.50  | 1453.28 | -3.25  | 0.00011674 |
| 95419_at    | H1f0                | H1 histone family, member 0                                                     | 1852.68 | 4486.82 | -2.42  | 0.00011699 |
| 100042_at   | Hagh                | hydroxyacyl glutathione hydrolase                                               | 1527.95 | 600.48  | 2.54   | 0.00011766 |
| 99161_at    | Grina               | glutamate receptor, ionotropic, NR1                                             | 8863.24 | 3677.67 | 2.41   | 0.00011772 |
| 97254_at    | Rbm8a               | RNA binding motif protein 8a                                                    | 468.63  | 1396.00 | -2.98  | 0.00011775 |
| 92271_at    | Pax6                | paired box gene 6                                                               | 49.86   | 317.46  | -6.37  | 0.00011857 |
| 160164_at   | Ube2v1              | ubiquitin-conjugating enzyme E2                                                 | 5159.75 | 1624.05 | 3.18   | 0.00011967 |
| 161139_f_at | Ddef1               | development and differentiation 1                                               | 3286.24 | 411.24  | 7.99   | 0.00012001 |
| 94667_at    | AA408396            | expressed sequence AA408396                                                     | 204.51  | 437.21  | -2.14  | 0.00012025 |
| 103708_at   | Eif1a               | eukaryotic translation initiation factor 1A                                     | 877.30  | 312.86  | 2.80   | 0.00012033 |
| 96691_at    | Taf11               | TAF11 RNA polymerase II, TATA box-binding protein associated factor 11          | 1697.68 | 776.35  | 2.19   | 0.00012079 |
| 160379_at   | Epb4.1              | erythrocyte protein band 4.1                                                    | 165.94  | 586.71  | -3.54  | 0.00012082 |
| 92580_at    | Hars                | histidyl-tRNA synthetase                                                        | 4857.81 | 256.26  | 18.96  | 0.00012131 |
| 97967_at    | Plxnd1              | plexin D1                                                                       | 2229.47 | 541.24  | 4.12   | 0.00012132 |
| 104419_at   | Fndc3a              | fibronectin type III domain containing 3a                                       | 43.94   | 102.79  | -2.34  | 0.00012169 |
| 92949_at    | Pacsin1             | protein kinase C and casein kinase 2 interacting serine/threonine phosphatase 1 | 2481.10 | 1214.98 | 2.04   | 0.00012235 |
| 101887_at   | Agt                 | angiotensinogen (serpin peptidase activator)                                    | 642.12  | 2372.63 | -3.69  | 0.00012244 |
| 103688_at   | Ankrd43             | ankyrin repeat domain 43                                                        | 64.44   | 204.53  | -3.17  | 0.00012245 |
| 95448_at    | Psmc2               | proteasome (prosome, macropain) 2                                               | 5749.38 | 1048.34 | 5.48   | 0.00012248 |
| 104237_at   | Pcbd2               | pterin 4 alpha carbinolamine dehydrogenase 2                                    | 1529.87 | 602.99  | 2.54   | 0.00012279 |
| 92452_at    | Pik3ca              | phosphatidylinositol 3-kinase, catalytic                                        | 720.91  | 162.20  | 4.44   | 0.00012327 |
| 101523_at   | Hnrpa3 /// LOC10004 | heterogeneous nuclear ribonucleoprotein A3                                      | 1002.43 | 2996.23 | -2.99  | 0.00012355 |
| 95565_at    | Mad2l1bp            | MAD2L1 binding protein                                                          | 2125.24 | 413.59  | 5.14   | 0.00012357 |
| 160424_f_at | Fdps                | farnesyl diphosphate synthetase                                                 | 4793.22 | 1706.43 | 2.81   | 0.00012386 |
| 103665_at   | Elovl6              | ELOVL family member 6, elongation factor-like                                   | 2896.47 | 842.15  | 3.44   | 0.00012418 |
| 94832_at    | Hnrph2              | heterogeneous nuclear ribonucleoprotein H2                                      | 34.80   | 134.29  | -3.86  | 0.00012418 |
| 160872_f_at | 2310008H09Rik       | RIKEN cDNA 2310008H09 gene                                                      | 482.95  | 94.41   | 5.12   | 0.00012625 |
| 103216_f_at | Ikbgk               | inhibitor of kappaB kinase gamma                                                | 1149.13 | 484.09  | 2.37   | 0.00012625 |
| 160302_at   | 1200003C05Rik       | RIKEN cDNA 1200003C05 gene                                                      | 2197.76 | 887.59  | 2.48   | 0.00012635 |
| 104091_at   | Tspan9              | tetraspanin 9                                                                   | 1273.10 | 2668.51 | -2.10  | 0.00012651 |
| 100101_at   | Snrpa               | small nuclear ribonucleoprotein A                                               | 640.48  | 1677.17 | -2.62  | 0.00012687 |
| 96258_at    | Mgst3               | microsomal glutathione S-transferase 3                                          | 1485.05 | 6806.41 | -4.58  | 0.00012698 |
| 94331_at    | Stat6               | signal transducer and activator of transcription 6                              | 372.64  | 121.08  | 3.08   | 0.0001272  |
| 92839_f_at  | Snrpb2              | U2 small nuclear ribonucleoprotein B2                                           | 1045.83 | 238.50  | 4.39   | 0.00012736 |
| 162249_f_at | Nkain1              | Na <sup>+</sup> /K <sup>+</sup> transporting ATPase interacting protein 1       | 396.90  | 1539.91 | -3.88  | 0.00012736 |
| 160189_at   | Nudt4               | nudix (nucleoside diphosphate linked moiety X) motif 4                          | 196.52  | 444.03  | -2.26  | 0.00012789 |
| 98562_at    | C1qa                | complement component 1, q subcomponent                                          | 168.74  | 478.79  | -2.84  | 0.00012806 |
| 95435_at    | Arl8b               | ADP-ribosylation factor-like 8B                                                 | 1962.39 | 315.14  | 6.23   | 0.00012808 |
| 99655_at    | Sec11a              | SEC11 homolog A (S. cerevisiae)                                                 | 2710.59 | 1192.04 | 2.27   | 0.00012816 |
| 103021_r_at | Map3k1              | mitogen-activated protein kinase 3                                              | 32.21   | 216.39  | -6.72  | 0.0001283  |
| 94022_at    | Gltscr2             | glioma tumor suppressor candidate 2                                             | 1682.42 | 651.41  | 2.58   | 0.00012995 |
| 97848_at    | RbmX                | RNA binding motif protein, X chromosome                                         | 66.75   | 160.25  | -2.40  | 0.00013024 |
| 93333_at    | Tbca                | tubulin cofactor A                                                              | 120.59  | 305.63  | -2.53  | 0.00013054 |
| 160874_r_at | Ruvb1               | RuvB-like protein 1                                                             | 1474.86 | 3193.85 | -2.17  | 0.00013056 |
| 160991_at   | Nkiras1             | NFKB inhibitor interacting Ras-lik                                              | 3121.96 | 911.98  | 3.42   | 0.00013061 |
| 100044_at   | Cldn11              | claudin 11                                                                      | 49.31   | 683.37  | -13.86 | 0.00013062 |
| 97934_at    | Galnt1              | UDP-N-acetyl-alpha-D-galactosamine 4-epimerase                                  | 2277.68 | 906.85  | 2.51   | 0.00013065 |
| 102965_at   | Znfx1               | zinc finger, NFX1-type containing                                               | 760.67  | 177.45  | 4.29   | 0.00013109 |
| 100509_at   | Rnf19a              | ring finger protein 19A                                                         | 3172.53 | 428.21  | 7.41   | 0.00013112 |
| 92374_at    | Adora1              | adenosine A1 receptor                                                           | 1703.67 | 182.79  | 9.32   | 0.00013119 |
| 99057_at    | Thy1                | thymus cell antigen 1, theta                                                    | 9063.95 | 1306.11 | 6.94   | 0.00013194 |

|             |               |                                    |         |          |       |            |
|-------------|---------------|------------------------------------|---------|----------|-------|------------|
| 97448_at    | 4933439C20Rik | RIKEN cDNA 4933439C20 gene         | 2576.84 | 463.67   | 5.56  | 0.00013196 |
| 95347_at    | Myt1          | myelin transcription factor 1      | 5381.17 | 1993.18  | 2.70  | 0.00013197 |
| 95114_s_at  | Cuta          | cutA divalent cation tolerance ho  | 501.79  | 1181.60  | -2.35 | 0.00013217 |
| 93119_at    | Cox5b         | cytochrome c oxidase, subunit Vt   | 535.68  | 2202.95  | -4.11 | 0.00013224 |
| 99123_s_at  | Fxc1          | fractured callus expressed transc  | 224.09  | 451.26   | -2.01 | 0.00013234 |
| 93347_at    | Rab24         | RAB24, member RAS oncogene fa      | 2012.77 | 495.72   | 4.06  | 0.00013241 |
| 161763_r_at | Pip4k2c       | phosphatidylinositol-5-phosphat    | 231.92  | 723.43   | -3.12 | 0.00013369 |
| 96320_at    | 2310044H10Rik | RIKEN cDNA 2310044H10 gene         | 5725.53 | 1436.21  | 3.99  | 0.00013398 |
| 100380_at   | EG544973      | H3 histone, family 3A              | 851.89  | 3401.47  | -3.99 | 0.00013412 |
| 101993_at   | Tnc           | tenascin C                         | 131.34  | 559.16   | -4.26 | 0.00013415 |
| 93382_at    | Pde1b         | phosphodiesterase 1B, Ca2+-caln    | 476.35  | 1018.89  | -2.14 | 0.00013429 |
| 93356_at    | Mcm7          | minichromosome maintenance d       | 316.57  | 732.66   | -2.31 | 0.00013486 |
| 93988_at    | Psm7          | proteasome (prosome, macropai      | 645.13  | 1936.71  | -3.00 | 0.00013541 |
| 93309_at    | Ddx3x         | DEAD/H (Asp-Glu-Ala-Asp/His) bc    | 42.92   | 165.80   | -3.86 | 0.00013595 |
| 104348_at   | Bre           | brain and reproductive organ-exp   | 1847.59 | 705.94   | 2.62  | 0.00013604 |
| 102319_at   | Snx12         | sorting nexin 12                   | 62.58   | 146.01   | -2.33 | 0.00013614 |
| 96117_r_at  | H13           | histocompatibility 13              | 1284.84 | 563.86   | 2.28  | 0.00013709 |
| 94047_at    | 0610031J06Rik | RIKEN cDNA 0610031J06 gene         | 2740.06 | 1225.81  | 2.24  | 0.0001374  |
| 103763_at   | Ash1l         | ash1 (absent, small, or homeotic)  | 1042.07 | 459.84   | 2.27  | 0.00013782 |
| 103456_at   | Ece1          | endothelin converting enzyme 1     | 1803.28 | 628.35   | 2.87  | 0.00013792 |
| 160255_at   | Ahnak         | AHNAK nucleoprotein (desmoyok      | 6259.24 | 306.47   | 20.42 | 0.00013803 |
| 160308_at   | Msn           | moesin                             | 3618.01 | 910.33   | 3.97  | 0.00013806 |
| 94301_at    | Atp6v0e       | ATPase, H+ transporting, lysosom   | 285.86  | 748.96   | -2.62 | 0.00013807 |
| 160678_at   | Tspan12       | tetraspanin 12                     | 32.35   | 94.44    | -2.92 | 0.00013822 |
| 104314_r_at | 1110032A03Rik | RIKEN cDNA 1110032A03 gene         | 886.68  | 338.52   | 2.62  | 0.00013902 |
| 98059_s_at  | Lmna          | lamin A                            | 4462.17 | 402.38   | 11.09 | 0.00013908 |
| 160742_at   | Plod3         | procollagen-lysine, 2-oxoglutarat  | 1231.29 | 585.26   | 2.10  | 0.00013925 |
| 92210_at    | Angpt2        | angiopoietin 2                     | 360.35  | 98.27    | 3.67  | 0.00013994 |
| 103370_at   | Lin7c         | lin-7 homolog C (C. elegans)       | 287.02  | 1852.61  | -6.45 | 0.00014095 |
| 98356_at    | Adcy9         | adenylate cyclase 9                | 1641.69 | 345.81   | 4.75  | 0.000141   |
| 161951_f_at | Mcart1        | mitochondrial carrier triple repea | 919.74  | 287.43   | 3.20  | 0.00014132 |
| 160271_at   | 0610007C21Rik | RIKEN cDNA 0610007C21 gene         | 332.20  | 967.27   | -2.91 | 0.00014133 |
| 96919_at    | Atp6v0c       | ATPase, H+ transporting, lysosom   | 3546.77 | 10572.08 | -2.98 | 0.00014141 |
| 160635_at   | Stx18         | syntaxin 18                        | 911.43  | 428.42   | 2.13  | 0.00014303 |
| 93971_f_at  | Psm12         | proteasome (prosome, macropai      | 2672.52 | 747.23   | 3.58  | 0.00014349 |
| 160680_at   | Cpeb1         | cytoplasmic polyadenylation eler   | 347.24  | 92.69    | 3.75  | 0.00014366 |
| 96343_at    | Actn4         | actinin alpha 4                    | 1250.26 | 619.66   | 2.02  | 0.00014437 |
| 97916_at    | 5730494N06Rik | RIKEN cDNA 5730494N06 gene         | 3100.79 | 1216.16  | 2.55  | 0.00014444 |
| 160776_at   | Wdr42a        | WD repeat domain 42A               | 836.41  | 317.69   | 2.63  | 0.00014452 |
| 97394_at    | Smarca5       | SWI/SNF related, matrix associat   | 124.01  | 277.33   | -2.24 | 0.00014454 |
| 104627_at   | Cds2          | CDP-diaclyglycerol synthase (pho   | 7621.00 | 331.68   | 22.98 | 0.00014455 |
| 101589_at   | Hmgn2         | high mobility group nucleosomal    | 259.10  | 1876.43  | -7.24 | 0.00014456 |
| 93861_f_at  | EG622147      | predicted gene, EG622147           | 130.35  | 323.62   | -2.48 | 0.00014478 |
| 101424_at   | Nmi           | N-myc (and STAT) interactor        | 176.43  | 87.34    | 2.02  | 0.00014523 |
| 99342_at    | Gabrd         | gamma-aminobutyric acid (GABA      | 143.29  | 347.89   | -2.43 | 0.00014557 |
| 94450_at    | Nsun2         | NOL1/NOP2/Sun domain family 2      | 1158.94 | 129.57   | 8.94  | 0.00014568 |
| 92378_at    | Ptprz1        | protein tyrosine phosphatase, re   | 98.47   | 297.54   | -3.02 | 0.00014576 |
| 97398_at    | Pck2          | phosphoenolpyruvate carboxykir     | 1133.53 | 285.61   | 3.97  | 0.00014602 |
| 93764_at    | Ndufa13       | NADH dehydrogenase (ubiquinor      | 619.22  | 1452.72  | -2.35 | 0.00014645 |
| 97924_at    | Gne           | glucosamine                        | 1535.23 | 546.13   | 2.81  | 0.00014656 |
| 100088_at   | LOC100044953  | protein phosphatase 1, catalytic s | 259.70  | 2409.58  | -9.28 | 0.00014691 |
| 102014_at   | Homer3        | homer homolog 3 (Drosophila)       | 251.58  | 561.17   | -2.23 | 0.00014698 |
| 93476_at    | Prkdc         | protein kinase, DNA activated, ca  | 1215.66 | 243.43   | 4.99  | 0.00014702 |
| 97847_at    | RbmX          | RNA binding motif protein, X chr   | 304.57  | 643.49   | -2.11 | 0.00014702 |
| 99178_at    | Gpm6b         | glycoprotein m6b                   | 618.69  | 1444.73  | -2.34 | 0.00014733 |

|                      |                       |                                               |          |          |       |            |
|----------------------|-----------------------|-----------------------------------------------|----------|----------|-------|------------|
| 93728_at             | Tsc22d1               | TSC22 domain family, member 1                 | 205.62   | 1229.94  | -5.98 | 0.00014746 |
| 92946_f_at           | Gria2                 | glutamate receptor, ionotropic, A             | 59.44    | 228.59   | -3.85 | 0.00014753 |
| 102335_at            | Kcnk1                 | potassium channel, subfamily K, i             | 545.00   | 2013.94  | -3.70 | 0.00014772 |
| 95395_at             | Ythdf3                | YTH domain family 3                           | 83.76    | 527.35   | -6.30 | 0.0001486  |
| 104102_at            | Htra2                 | HtrA serine peptidase 2                       | 1498.11  | 316.61   | 4.73  | 0.00014872 |
| 93693_at             | Hmbox1                | homeobox containing 1                         | 1975.66  | 771.75   | 2.56  | 0.00014883 |
| 101834_at            | Mapk3                 | mitogen-activated protein kinase              | 995.35   | 374.04   | 2.66  | 0.00014883 |
| 93593_f_at           | Emp3                  | epithelial membrane protein 3                 | 3325.42  | 1234.09  | 2.69  | 0.00014889 |
| 95158_at             | H2-Ke2                | H2-K region expressed gene 2                  | 622.54   | 1612.43  | -2.59 | 0.0001491  |
| 98083_at             | Klf6                  | Kruppel-like factor 6                         | 1473.03  | 481.73   | 3.06  | 0.00014911 |
| 97541_f_at           | H2-D1 /// H2-K1 /// L | histocompatibility 2, D region loc            | 3573.30  | 114.81   | 31.12 | 0.00014916 |
| 161754_f_at          | Glb1                  | galactosidase, beta 1                         | 407.40   | 138.94   | 2.93  | 0.00014956 |
| 99445_at             | Slc44a2               | solute carrier family 44, member              | 749.82   | 126.27   | 5.94  | 0.00015037 |
| 94001_at             | Elavl1                | ELAV (embryonic lethal, abnorma               | 116.70   | 427.91   | -3.67 | 0.00015059 |
| 94048_at             | Cdc34 /// LOC10004    | cell division cycle 34 homolog (S.            | 622.62   | 278.90   | 2.23  | 0.000151   |
| 160479_at            | Cat                   | catalase                                      | 1298.10  | 323.99   | 4.01  | 0.00015176 |
| 162134_r_at          | 2010111I01Rik         | RIKEN cDNA 2010111I01 gene                    | 1842.13  | 4408.41  | -2.39 | 0.00015277 |
| 162049_f_at          | Gdpd5                 | glycerophosphodiester phosphoc                | 685.05   | 192.52   | 3.56  | 0.00015285 |
| 162092_f_at          | Ihpk1                 | inositol hexaphosphate kinase 1               | 299.57   | 111.28   | 2.69  | 0.0001536  |
| 103818_at            | Slc7a7                | solute carrier family 7 (cationic a           | 3225.08  | 230.48   | 13.99 | 0.00015382 |
| 160082_s_at          | Arf4                  | ADP-ribosylation factor 4                     | 521.80   | 1313.78  | -2.52 | 0.00015384 |
| 95682_at             | Ddb1                  | damage specific DNA binding pro               | 8310.69  | 3919.78  | 2.12  | 0.00015388 |
| 160599_r_at          | Rsph1                 | radial spoke head 1 homolog (Ch               | 1002.53  | 2367.44  | -2.36 | 0.0001539  |
| 97296_at             | Mrpl44                | mitochondrial ribosomal protein               | 421.24   | 133.68   | 3.15  | 0.00015438 |
| 92678_at             | Ddx25                 | DEAD (Asp-Glu-Ala-Asp) box poly               | 88.11    | 251.14   | -2.85 | 0.00015455 |
| 103911_at            | Sumf1                 | sulfatase modifying factor 1                  | 1282.53  | 203.32   | 6.31  | 0.00015462 |
| 160930_at            | Sacm1l                | SAC1 (suppressor of actin mutati              | 1224.65  | 290.31   | 4.22  | 0.00015464 |
| 161962_f_at          | Mfap4                 | microfibrillar-associated protein             | 149.51   | 448.45   | -3.00 | 0.000155   |
| 160291_at            | Sec61a1               | Sec61 alpha 1 subunit (S. cerevisi            | 4502.70  | 1302.26  | 3.46  | 0.00015648 |
| 103449_at            | Lsm14b                | LSM14 homolog B (SCD6, S. cerev               | 4000.00  | 1869.67  | 2.14  | 0.00015857 |
| 160417_at            | Kif5b                 | kinesin family member 5B                      | 54.35    | 219.12   | -4.03 | 0.00015897 |
| 101453_at            | Mia1                  | melanoma inhibitory activity 1                | 178.81   | 1392.81  | -7.79 | 0.00015904 |
| 96357_at             | Arpc1b /// EG434782   | actin related protein 2/3 comple              | 2750.41  | 1077.18  | 2.55  | 0.00015936 |
| 96708_at             | Tmed3                 | transmembrane emp24 domain c                  | 957.62   | 356.72   | 2.68  | 0.0001596  |
| 160536_at            | Hras1                 | Harvey rat sarcoma virus oncoge               | 3569.50  | 1335.25  | 2.67  | 0.00015961 |
| 161474_r_at          | Dpep3                 | dipeptidase 3                                 | 555.12   | 1315.80  | -2.37 | 0.00015963 |
| 94514_s_at           | Arcn1                 | archain 1                                     | 1424.93  | 528.42   | 2.70  | 0.00016105 |
| 99917_at             | Ezh2                  | enhancer of zeste homolog 2 (Dri              | 221.09   | 464.31   | -2.10 | 0.00016114 |
| AFFX-b-ActinMur/Actb |                       | actin, beta, cytoplasmic                      | 10780.67 | 25071.17 | -2.33 | 0.00016146 |
| 93017_at             | Sdcbp                 | syndecan binding protein                      | 2212.85  | 158.29   | 13.98 | 0.00016148 |
| 160125_at            | Cdkn2aipnl            | CDKN2A interacting protein N-ter              | 448.03   | 218.91   | 2.05  | 0.00016117 |
| 100225_f_at          | Psmc3                 | proteasome (prosome, macropai                 | 2813.43  | 842.11   | 3.34  | 0.00016176 |
| 97824_at             | Nola2                 | nucleolar protein family A, memk              | 556.78   | 1217.96  | -2.19 | 0.00016181 |
| 104677_at            | Man1b1                | mannosidase, alpha, class 1B, me              | 1942.78  | 394.49   | 4.92  | 0.00016184 |
| 162452_at            | Pcp2                  | Purkinje cell protein 2 (L7)                  | 401.65   | 1230.43  | -3.06 | 0.00016187 |
| 95791_s_at           | Sfrs2                 | splicing factor, arginine/serine-ric          | 102.95   | 660.45   | -6.42 | 0.00016119 |
| 94042_f_at           | Gng5 /// LOC100043    | guanine nucleotide binding prote              | 1696.18  | 4132.53  | -2.44 | 0.00016284 |
| 95474_at             | F2r                   | coagulation factor II (thrombin) r            | 6528.88  | 1998.58  | 3.27  | 0.00016291 |
| 94499_at             | Mgea5                 | meningioma expressed antigen 5                | 3819.44  | 1691.37  | 2.26  | 0.00016296 |
| 96079_at             | 0610010K06Rik         | RIKEN cDNA 0610010K06 gene                    | 6019.48  | 1427.35  | 4.22  | 0.00016297 |
| 95897_at             | Atp2c1 /// LOC10004   | ATPase, Ca <sup>++</sup> -sequestering /// hy | 4720.12  | 1011.21  | 4.67  | 0.00016344 |
| 161058_f_at          | R74862                | expressed sequence R74862                     | 57.52    | 123.67   | -2.15 | 0.00016363 |
| 94214_at             | Fabp3                 | fatty acid binding protein 3, musc            | 259.36   | 613.22   | -2.36 | 0.00016404 |
| 103608_at            | Fars2                 | phenylalanine-tRNA synthetase 2               | 896.83   | 363.37   | 2.47  | 0.00016423 |
| 95652_at             | Ndufa7                | NADH dehydrogenase (ubiquinor                 | 1181.32  | 4280.63  | -3.62 | 0.00016466 |



|             |                     |                                      |         |          |        |            |
|-------------|---------------------|--------------------------------------|---------|----------|--------|------------|
| 92597_s_at  | Atp6v1b2            | ATPase, H+ transporting, lysosom     | 52.20   | 212.90   | -4.08  | 0.00016539 |
| 104030_at   | Ptch1               | patched homolog 1                    | 282.38  | 675.22   | -2.39  | 0.00016551 |
| 160486_at   | Ccdc28b             | coiled coil domain containing 28E    | 183.47  | 846.57   | -4.61  | 0.00016613 |
| 92747_at    | Nkx2-2              | NK2 transcription factor related,    | 58.53   | 184.01   | -3.14  | 0.00016618 |
| 96609_at    | Sfrs11              | splicing factor, arginine/serine-ric | 366.75  | 1484.15  | -4.05  | 0.00016634 |
| 101837_g_at | LOC100048520 /// LC | protein phosphatase 1B, magnes       | 167.85  | 438.48   | -2.61  | 0.00016706 |
| 160982_at   | Map3k7ip3           | mitogen-activated protein kinase     | 729.46  | 176.45   | 4.13   | 0.00016741 |
| 103451_at   | Ptk2b               | PTK2 protein tyrosine kinase 2 be    | 991.60  | 286.17   | 3.47   | 0.00016773 |
| 103429_i_at | Adi1                | acireductone dioxygenase 1           | 60.13   | 200.91   | -3.34  | 0.00016781 |
| 102924_at   | Dtx1                | deltex 1 homolog (Drosophila)        | 377.06  | 774.51   | -2.05  | 0.00016809 |
| 160139_at   | Hspb8               | heat shock protein 8                 | 4419.49 | 614.45   | 7.19   | 0.00017022 |
| 160345_at   | Mrpl34              | mitochondrial ribosomal protein      | 245.78  | 828.07   | -3.37  | 0.00017023 |
| 161070_at   | Spred2              | sprouty-related, EVH1 domain co      | 1485.02 | 525.24   | 2.83   | 0.00017084 |
| 101447_at   | Apc                 | adenomatosis polyposis coli          | 114.47  | 289.99   | -2.53  | 0.00017112 |
| 162462_r_at | Pck2                | phosphoenolpyruvate carboxykir       | 351.05  | 167.41   | 2.10   | 0.00017166 |
| 96723_f_at  | Ssx2ip              | synovial sarcoma, X breakpoint 2     | 3817.64 | 1740.78  | 2.19   | 0.00017254 |
| 161897_f_at | AU021838 /// Mipol1 | phosphoribosyl pyrophosphate s'      | 61.14   | 125.76   | -2.06  | 0.00017256 |
| 99619_at    | Tmem41b             | transmembrane protein 41B            | 6107.99 | 2516.57  | 2.43   | 0.00017259 |
| 104482_at   | Stx2                | syntaxin 2                           | 3747.32 | 1416.23  | 2.65   | 0.00017263 |
| 161497_f_at | Itga7               | integrin alpha 7                     | 1451.71 | 664.69   | 2.18   | 0.00017401 |
| 92539_at    | S100a10             | S100 calcium binding protein A1C     | 4722.53 | 408.95   | 11.55  | 0.00017419 |
| 99120_f_at  | Chd4                | chromodomain helicase DNA bin        | 9131.48 | 3140.32  | 2.91   | 0.00017426 |
| 93217_at    | Fbxo45              | F-box protein 45                     | 2933.58 | 872.70   | 3.36   | 0.00017562 |
| 97239_at    | D19ErtD721e         | DNA segment, Chr 19, ERATO Do        | 695.69  | 107.53   | 6.47   | 0.00017621 |
| 160297_at   | Ccdc58              | coiled-coil domain containing 58     | 53.59   | 111.11   | -2.07  | 0.00017854 |
| 98441_at    | Fmr1                | fragile X mental retardation synd    | 49.40   | 383.45   | -7.76  | 0.00017862 |
| 95609_at    | Ppp1r15b            | protein phosphatase 1, regulator     | 1211.65 | 463.68   | 2.61   | 0.00017913 |
| 97518_at    | Fdft1               | farnesyl diphosphate farnesyl tra    | 4416.36 | 1735.56  | 2.54   | 0.00017964 |
| 97429_at    | Snrk                | SNF related kinase                   | 892.79  | 249.87   | 3.57   | 0.00018026 |
| 95517_i_at  | BC004004            | cDNA sequence BC004004               | 4495.53 | 1486.03  | 3.03   | 0.00018032 |
| 102726_at   | Tac1                | tachykinin 1                         | 5837.31 | 59.23    | 98.56  | 0.00018082 |
| 93966_at    | Ube4b               | ubiquitination factor E4B, UFD2 f    | 2458.89 | 966.27   | 2.54   | 0.00018125 |
| 92358_at    | Nell2               | NEL-like 2 (chicken)                 | 135.87  | 406.41   | -2.99  | 0.00018132 |
| 160227_s_at | Bysl                | bystin-like                          | 2613.78 | 869.26   | 3.01   | 0.00018289 |
| 101524_at   | Hnrpa3              | heterogeneous nuclear ribonucle      | 35.78   | 140.69   | -3.93  | 0.00018441 |
| 98049_at    | 1300018I05Rik       | RIKEN cDNA 1300018I05 gene           | 1279.09 | 373.27   | 3.43   | 0.0001847  |
| 93844_at    | Uqcrq               | ubiquinol-cytochrome c reductas      | 2698.42 | 10371.84 | -3.84  | 0.00018492 |
| 101836_at   | Ppm1b               | protein phosphatase 1B, magnes       | 197.50  | 42.28    | 4.67   | 0.0001851  |
| 102410_at   | Hs3st1              | heparan sulfate (glucosamine) 3-     | 101.05  | 335.34   | -3.32  | 0.00018514 |
| 95483_at    | Psmd1               | proteasome (prosome, macropai        | 3081.87 | 1333.21  | 2.31   | 0.00018561 |
| 103484_at   | Popdc3              | popeye domain containing 3           | 1177.14 | 172.36   | 6.83   | 0.00018593 |
| 97473_at    | Tspan4              | tetraspanin 4                        | 1145.34 | 2618.76  | -2.29  | 0.000186   |
| 97527_at    | Cks2 /// LOC1000394 | CDC28 protein kinase regulatory      | 77.33   | 490.44   | -6.34  | 0.00018735 |
| 160475_at   | Yipf4               | Yip1 domain family, member 4         | 293.35  | 880.69   | -3.00  | 0.00018753 |
| 99085_at    | Usp3                | ubiquitin specific peptidase 3       | 228.61  | 497.97   | -2.18  | 0.00018762 |
| 95232_at    | Hnrnpl              | heterogeneous nuclear ribonucle      | 155.51  | 452.77   | -2.91  | 0.00018886 |
| 100720_at   | Pabpc1              | poly A binding protein, cytoplasr    | 2123.72 | 4421.26  | -2.08  | 0.0001891  |
| 96259_at    | Npepps              | aminopeptidase puromycin sensi       | 4426.43 | 1431.94  | 3.09   | 0.00019029 |
| 95447_at    | 1810034K20Rik       | RIKEN cDNA 1810034K20 gene           | 232.61  | 474.78   | -2.04  | 0.00019043 |
| 161036_at   | Slc6a15             | solute carrier family 6 (neurotran   | 2299.14 | 789.04   | 2.91   | 0.00019131 |
| 93820_at    | Cox7a2              | cytochrome c oxidase, subunit VI     | 534.69  | 6450.48  | -12.06 | 0.00019137 |
| 96561_at    | Nfatc2ip            | nuclear factor of activated T-cells  | 57.17   | 134.36   | -2.35  | 0.00019138 |
| 96771_at    | ErbB3               | v-erb-b2 erythroblastic leukemia     | 791.24  | 224.07   | 3.53   | 0.00019196 |
| 160187_at   | Pafah1b2            | platelet-activating factor acetylhy  | 3406.59 | 1021.65  | 3.33   | 0.00019286 |
| 96207_at    | Rbms1               | RNA binding motif, single strand     | 1259.56 | 278.53   | 4.52   | 0.00019291 |

|             |                     |                                      |         |          |        |            |
|-------------|---------------------|--------------------------------------|---------|----------|--------|------------|
| 160159_at   | Ccnb1 /// Ccnb1-rs1 | cyclin B1, related sequence 1 ///    | 40.22   | 182.14   | -4.53  | 0.00019325 |
| 102875_at   | Rps6kc1             | ribosomal protein S6 kinase poly     | 635.88  | 186.24   | 3.41   | 0.00019562 |
| 97110_at    | Chst2               | Carbohydrate sulfotransferase 2      | 190.46  | 1082.45  | -5.68  | 0.00019565 |
| 94422_at    | Dnajc13             | DnaJ (Hsp40) homolog, subfamily      | 1695.85 | 128.78   | 13.17  | 0.00019662 |
| 104501_at   | Vapb                | vesicle-associated membrane prc      | 3638.69 | 861.52   | 4.22   | 0.00019691 |
| 160335_at   | Gclm                | glutamate-cysteine ligase , modif    | 2352.81 | 250.20   | 9.40   | 0.00019697 |
| 95406_at    | 1810037117Rik       | RIKEN cDNA 1810037117 gene           | 1068.25 | 3578.03  | -3.35  | 0.00019702 |
| 96275_f_at  | Tm9sf3              | transmembrane 9 superfamily m        | 559.80  | 148.61   | 3.77   | 0.00019703 |
| 96495_at    | Myt1l               | myelin transcription factor 1-like   | 3746.81 | 956.74   | 3.92   | 0.00019781 |
| 161364_f_at | Faf1                | Fas-associated factor 1              | 871.94  | 235.80   | 3.70   | 0.00019791 |
| 92770_at    | S100a6              | S100 calcium binding protein A6      | 1158.49 | 286.06   | 4.05   | 0.00019793 |
| 160885_at   | Nucks1              | nuclear casein kinase and cyclin-c   | 570.12  | 1234.06  | -2.16  | 0.00019797 |
| 94910_at    | Nde1                | nuclear distribution gene E homc     | 76.83   | 248.81   | -3.24  | 0.00019812 |
| 160726_at   | Qk                  | quaking                              | 85.93   | 883.93   | -10.29 | 0.00019895 |
| 94508_at    | Tmem126a            | transmembrane protein 126A           | 176.81  | 735.96   | -4.16  | 0.00019922 |
| 104595_at   | Stag2               | stromal antigen 2                    | 77.23   | 262.72   | -3.40  | 0.00019977 |
| 102058_at   | Mrpl9               | mitochondrial ribosomal protein      | 1079.13 | 251.73   | 4.29   | 0.00019978 |
| 100877_at   | 1810058124Rik       | RIKEN cDNA 1810058124 gene           | 2347.09 | 650.33   | 3.61   | 0.00020003 |
| 97859_at    | Inpp5a              | inositol polyphosphate-5-phosph      | 227.59  | 1683.14  | -7.40  | 0.00020014 |
| 161449_f_at | Cwf19l1             | CWF19-like 1, cell cycle control (   | 110.18  | 45.62    | 2.42   | 0.00020052 |
| 99593_at    | BC002163 /// Ndufs5 | cDNA sequence BC002163 /// NA        | 827.86  | 3725.92  | -4.50  | 0.00020221 |
| 95010_at    | Traf3               | Tnf receptor-associated factor 3     | 1859.44 | 511.83   | 3.63   | 0.00020313 |
| 99166_at    | 0610012G03Rik       | RIKEN cDNA 0610012G03 gene           | 459.59  | 1619.25  | -3.52  | 0.00020314 |
| 94505_at    | Peli1               | pellino 1                            | 269.41  | 598.72   | -2.22  | 0.00020345 |
| 93987_f_at  | LOC100042049 /// R  | ribosomal protein L22 like 1 /// si  | 805.58  | 3428.38  | -4.26  | 0.00020366 |
| 161401_f_at | Aldh3a2             | aldehyde dehydrogenase family        | 930.47  | 219.25   | 4.24   | 0.00020395 |
| 161000_i_at | Nusap1              | nucleolar and spindle associated     | 104.31  | 407.05   | -3.90  | 0.00020468 |
| 96042_at    | Sod2                | superoxide dismutase 2, mitoch       | 1662.53 | 437.99   | 3.80   | 0.00020509 |
| 95913_at    | Sfrs17b             | splicing factor, arginine/serine-ric | 1078.12 | 181.97   | 5.92   | 0.00020587 |
| 103668_at   | Supt6h              | suppressor of Ty 6 homolog (S. ce    | 2678.40 | 940.49   | 2.85   | 0.00020697 |
| 93615_at    | Pbx3                | pre B-cell leukemia transcription    | 1005.38 | 325.13   | 3.09   | 0.00020699 |
| 103932_at   | Wdsof1              | WD repeats and SOF domain con        | 657.06  | 263.00   | 2.50   | 0.00020723 |
| 92527_at    | Adcy9               | adenylate cyclase 9                  | 1004.14 | 245.52   | 4.09   | 0.00020808 |
| 102308_at   | Tulp3               | tubby-like protein 3                 | 1982.87 | 821.53   | 2.41   | 0.00020811 |
| 95745_g_at  | Atp6v1a             | ATPase, H+ transporting, lysosorr    | 2879.94 | 805.90   | 3.57   | 0.00021007 |
| 103672_at   | Phf23               | PHD finger protein 23                | 2035.62 | 568.36   | 3.58   | 0.0002101  |
| 103467_g_at | Cyhr1               | cysteine and histidine rich 1        | 2855.30 | 567.89   | 5.03   | 0.00021028 |
| 92615_at    | Ndufb6              | NADH dehydrogenase (ubiquinor        | 163.63  | 2379.02  | -14.54 | 0.00021037 |
| 101889_s_at | Rora                | RAR-related orphan receptor alpl     | 46.42   | 205.14   | -4.42  | 0.00021084 |
| 94239_at    | Pnn                 | pinin                                | 56.35   | 115.89   | -2.06  | 0.00021128 |
| 92339_at    | Taf1a               | TATA box binding protein (Tbp)-a     | 940.97  | 242.39   | 3.88   | 0.00021169 |
| 103312_f_at | Esf1                | ESF1, nucleolar pre-rRNA process     | 652.46  | 228.34   | 2.86   | 0.00021218 |
| 104080_at   | Pdap1               | PDGFA associated protein 1           | 2435.93 | 889.21   | 2.74   | 0.00021261 |
| 94827_at    | Fxyd2               | FXYP domain-containing ion tran      | 5842.66 | 274.63   | 21.27  | 0.00021262 |
| 95620_at    | Dhrs7               | dehydrogenase/reductase (SDR f       | 1675.14 | 404.30   | 4.14   | 0.00021264 |
| 94958_at    | 1110013L07Rik       | RIKEN cDNA 1110013L07 gene           | 756.34  | 166.58   | 4.54   | 0.00021386 |
| 99336_at    | Rps5                | ribosomal protein S5                 | 3818.99 | 11033.25 | -2.89  | 0.0002139  |
| 100066_at   | Gart                | phosphoribosylglycinamide form       | 2183.62 | 326.82   | 6.68   | 0.000214   |
| 161359_s_at | Apoa1bp             | apolipoprotein A-I binding protei    | 6532.02 | 2802.67  | 2.33   | 0.00021414 |
| 103569_at   | Sh3glb1             | SH3-domain GRB2-like B1 (endoc       | 187.87  | 423.49   | -2.25  | 0.00021424 |
| 98521_at    | Vamp3               | vesicle-associated membrane prc      | 47.53   | 134.69   | -2.83  | 0.00021431 |
| 102781_at   | Ccnl2               | cyclin L2                            | 335.86  | 896.98   | -2.67  | 0.00021493 |
| 100536_at   | Mobp                | myelin-associated oligodendrocy      | 131.64  | 1811.19  | -13.76 | 0.00021496 |
| 97292_at    | 2810407C02Rik       | RIKEN cDNA 2810407C02 gene           | 5643.02 | 2740.92  | 2.06   | 0.00021504 |
| 96573_at    | Actg1               | actin, gamma, cytoplasmic 1          | 4841.07 | 10288.42 | -2.13  | 0.00021509 |

|             |                     |                                     |         |          |        |            |
|-------------|---------------------|-------------------------------------|---------|----------|--------|------------|
| 102561_at   | Atp5k /// LOC100040 | ATP synthase, H+ transporting, m    | 243.50  | 656.46   | -2.70  | 0.00021602 |
| 92971_at    | 9130213B05Rik       | RIKEN cDNA 9130213B05 gene          | 2809.95 | 202.01   | 13.91  | 0.0002161  |
| 99158_at    | Ostf1               | osteoclast stimulating factor 1     | 2951.54 | 404.96   | 7.29   | 0.00021689 |
| 98129_at    | LOC100043712 /// LC | thymosin, beta 10 /// similar to t  | 1077.41 | 12595.44 | -11.69 | 0.00021784 |
| 102409_at   | Lsm8                | LSM8 homolog, U6 small nuclear      | 309.02  | 767.30   | -2.48  | 0.00021795 |
| 102852_at   | Cdh2 /// LOC100044  | cadherin 2 /// similar to N-cadhe   | 378.73  | 967.44   | -2.55  | 0.00022077 |
| 160366_at   | BC031181            | cDNA sequence BC031181              | 307.39  | 2080.20  | -6.77  | 0.00022084 |
| 98920_g_at  | Tm2d2               | TM2 domain containing 2             | 107.88  | 377.48   | -3.50  | 0.00022093 |
| 103987_at   | Mog                 | myelin oligodendrocyte glycopro     | 48.20   | 593.49   | -12.31 | 0.00022106 |
| 96577_i_at  | Ubap2l              | ubiquitin associated protein 2-lik  | 1319.46 | 306.49   | 4.31   | 0.00022162 |
| 100459_at   | Rad50               | RAD50 homolog (S. cerevisiae)       | 968.71  | 409.17   | 2.37   | 0.00022227 |
| 95703_at    | Sae1                | SUMO1 activating enzyme subun       | 1595.30 | 655.09   | 2.44   | 0.00022244 |
| 103334_at   | Crcp                | calcitonin gene-related peptide-r   | 789.71  | 226.84   | 3.48   | 0.00022245 |
| 99674_at    | Mrpl43              | mitochondrial ribosomal protein     | 1988.47 | 852.61   | 2.33   | 0.00022269 |
| 94967_at    | Ermp1               | endoplasmic reticulum metallope     | 2593.30 | 419.62   | 6.18   | 0.00022275 |
| 97836_at    | Rnf7                | ring finger protein 7               | 2232.81 | 997.84   | 2.24   | 0.00022228 |
| 99163_at    | 4921506J03Rik       | RIKEN cDNA 4921506J03 gene          | 214.75  | 441.86   | -2.06  | 0.00022314 |
| 95102_at    | Shisa5              | shisa homolog 5 (Xenopus laevis)    | 1705.61 | 676.19   | 2.52   | 0.00022535 |
| 92850_at    | Rrbp1               | ribosome binding protein 1          | 782.80  | 291.44   | 2.69   | 0.00022597 |
| 104422_at   | Ptpn                | protein tyrosine phosphatase, re    | 3555.59 | 1051.81  | 3.38   | 0.00022605 |
| 160349_at   | Cndp2               | CNDP dipeptidase 2 (metallopept     | 1113.66 | 427.71   | 2.60   | 0.00022635 |
| 96569_at    | Figl1               | fidgetin-like 1                     | 1253.47 | 2533.80  | -2.02  | 0.00022779 |
| 103727_at   | Hrb                 | HIV-1 Rev binding protein           | 1303.44 | 478.16   | 2.73   | 0.00022957 |
| 92708_at    | Ddx19b              | DEAD (Asp-Glu-Ala-Asp) box poly     | 1223.80 | 395.61   | 3.09   | 0.00023046 |
| 100538_at   | Sod1                | superoxide dismutase 1, soluble     | 5648.45 | 1363.80  | 4.14   | 0.0002305  |
| 93054_at    | Ankrd46             | ankyrin repeat domain 46            | 5636.99 | 1618.31  | 3.48   | 0.00023057 |
| 101105_at   | Banf1               | barrier to autointegration factor   | 945.54  | 3594.25  | -3.80  | 0.00023084 |
| 104645_at   | Klf7                | Kruppel-like factor 7 (ubiquitous)  | 4270.62 | 427.79   | 9.98   | 0.00023096 |
| 97477_at    | Timm8b              | translocase of inner mitochondri    | 225.96  | 843.68   | -3.73  | 0.00023176 |
| 101853_f_at | Cfh /// LOC10004801 | complement component factor h       | 45.75   | 92.54    | -2.02  | 0.00023179 |
| 98603_s_at  | Rangap1             | RAN GTPase activating protein 1     | 230.01  | 601.43   | -2.61  | 0.00023323 |
| 101573_f_at | EG432798 /// EG546  | ribosomal protein L27a /// predic   | 1511.81 | 3896.57  | -2.58  | 0.00023329 |
| 162228_f_at | Stard3              | START domain containing 3           | 466.14  | 188.97   | 2.47   | 0.00023333 |
| 104578_f_at | Actn1               | actinin, alpha 1                    | 1912.47 | 382.90   | 4.99   | 0.00023343 |
| 97867_at    | Hsd11b1             | hydroxysteroid 11-beta dehydrog     | 214.03  | 592.43   | -2.77  | 0.0002338  |
| 96024_at    | Ahcy                | S-adenosylhomocysteine hydroლა      | 1251.25 | 506.81   | 2.47   | 0.00023388 |
| 104078_g_at | Lage3               | L antigen family, member 3          | 124.01  | 407.62   | -3.29  | 0.00023388 |
| 93829_at    | Rod1                | ROD1 regulator of differentiation   | 507.83  | 139.50   | 3.64   | 0.00023391 |
| 160908_r_at | Ttc30b              | tetratricopeptide repeat domain     | 183.39  | 390.18   | -2.13  | 0.00023396 |
| 97387_at    | Chpf                | chondroitin polymerizing factor     | 3195.88 | 1440.17  | 2.22   | 0.00023432 |
| 96331_at    | Snx2                | sorting nexin 2                     | 966.47  | 371.35   | 2.60   | 0.00023561 |
| 104717_at   | Zfp644              | zinc finger protein 644             | 477.27  | 1330.47  | -2.79  | 0.00023662 |
| 160265_at   | Eif5                | eukaryotic translation initiation f | 2583.77 | 1114.57  | 2.32   | 0.0002387  |
| 101430_at   | Sox4                | SRY-box containing gene 4           | 262.91  | 907.38   | -3.45  | 0.00023875 |
| 100065_r_at | Gja1                | gap junction protein, alpha 1       | 65.86   | 297.90   | -4.52  | 0.00023916 |
| 92542_at    | D4Wsu53e            | DNA segment, Chr 4, Wayne Stat      | 4014.35 | 1502.36  | 2.67   | 0.00023953 |
| 97369_g_at  | Akap1               | A kinase (PRKA) anchor protein 1    | 108.79  | 291.84   | -2.68  | 0.00023981 |
| 102374_at   | Rcan3               | regulator of calcineurin 3          | 5583.14 | 670.56   | 8.33   | 0.00023983 |
| 103081_at   | Baz1b               | bromodomain adjacent to zinc fir    | 4346.87 | 1621.13  | 2.68   | 0.00023989 |
| 102235_at   | Mycl1               | v-myc myelocytomatosis viral on     | 273.84  | 702.43   | -2.57  | 0.00024    |
| 160803_at   | Ubx6                | UBX domain containing 6             | 511.28  | 175.70   | 2.91   | 0.00024156 |
| 161796_r_at | Kcnq1               | potassium voltage-gated channel     | 633.36  | 1313.00  | -2.07  | 0.00024165 |
| 97248_at    | Dbi                 | diazepam binding inhibitor          | 139.76  | 3078.18  | -22.03 | 0.00024177 |
| 104492_at   | Ebf3                | early B-cell factor 3               | 178.08  | 519.15   | -2.92  | 0.00024192 |
| 103647_at   | Glb1                | galactosidase, beta 1               | 869.50  | 334.46   | 2.60   | 0.00024287 |

|             |                      |                                      |          |         |       |            |
|-------------|----------------------|--------------------------------------|----------|---------|-------|------------|
| 93958_at    | Rnf14                | ring finger protein 14               | 147.37   | 331.17  | -2.25 | 0.00024446 |
| 161147_f_at | ---                  | ---                                  | 2224.30  | 712.87  | 3.12  | 0.00024493 |
| 96590_f_at  | Otud7b               | OTU domain containing 7B             | 971.00   | 325.34  | 2.98  | 0.00024499 |
| 94481_at    | Ugp2                 | UDP-glucose pyrophosphorylase        | 1503.22  | 431.05  | 3.49  | 0.00024579 |
| 93501_f_at  | Sucla2               | succinate-Coenzyme A ligase, AD      | 5081.85  | 1428.31 | 3.56  | 0.00024596 |
| 160236_at   | Slain1               | SLAIN motif family, member 1         | 33.65    | 192.99  | -5.73 | 0.00024599 |
| 95092_at    | Ppp3ca               | protein phosphatase 3, catalytic s   | 4925.61  | 1927.44 | 2.56  | 0.00024646 |
| 95097_at    | Actr10               | ARP10 actin-related protein 10 h     | 3126.67  | 1004.69 | 3.11  | 0.00024694 |
| 160539_at   | LOC100048559 /// Sf  | splicing factor, arginine/serine-ric | 25.08    | 246.53  | -9.83 | 0.00024702 |
| 92565_at    | 1110005A23Rik /// Ei | RIKEN cDNA 1110005A23 gene //        | 184.53   | 383.11  | -2.08 | 0.00024742 |
| 160563_at   | Serf2                | small EDRK-rich factor 2             | 803.18   | 210.58  | 3.81  | 0.00024807 |
| 97271_at    | Lsmd1                | LSM domain containing 1              | 223.84   | 589.06  | -2.63 | 0.00024853 |
| 103493_at   | Nmb                  | neuromedin B                         | 827.74   | 79.07   | 10.47 | 0.00024872 |
| 102009_at   | Cyfp2                | cytoplasmic FMR1 interacting prc     | 6276.72  | 512.50  | 12.25 | 0.00024878 |
| 103835_f_at | Hpcal1               | hippocalcin-like 1                   | 2333.90  | 5987.63 | -2.57 | 0.00024883 |
| 93574_at    | Serpinf1             | serine (or cysteine) peptidase inh   | 687.66   | 173.39  | 3.97  | 0.00025105 |
| 104345_at   | Exoc7                | exocyst complex component 7          | 1023.56  | 503.52  | 2.03  | 0.00025241 |
| 160321_at   | LOC100047896 /// Zf  | zinc finger, AN1-type domain 5 //    | 1862.90  | 5172.18 | -2.78 | 0.00025247 |
| 160585_at   | Bxdc1                | brix domain containing 1             | 384.61   | 100.97  | 3.81  | 0.00025302 |
| 98293_g_at  | Gsbs                 | G substrate                          | 69.52    | 263.38  | -3.79 | 0.00025421 |
| 96354_at    | Mbnl1                | muscleblind-like 1 (Drosophila)      | 1759.40  | 810.36  | 2.17  | 0.00025587 |
| 102108_f_at | Myh9                 | myosin, heavy polypeptide 9, nor     | 1189.25  | 304.08  | 3.91  | 0.00025708 |
| 92958_at    | Foxo3a               | forkhead box O3a                     | 976.73   | 431.42  | 2.26  | 0.00025805 |
| 101061_at   | Ssr2                 | signal sequence receptor, beta       | 600.31   | 1270.81 | -2.12 | 0.00025847 |
| 94366_at    | 2310079N02Rik        | RIKEN cDNA 2310079N02 gene           | 928.89   | 422.72  | 2.20  | 0.0002595  |
| 92484_at    | Hivep2               | human immunodeficiency virus t       | 38.98    | 230.66  | -5.92 | 0.00025962 |
| 160573_at   | Hccs                 | holocytochrome c synthetase          | 691.35   | 323.47  | 2.14  | 0.00025965 |
| 99100_at    | Stat3                | signal transducer and activator o    | 2157.16  | 518.91  | 4.16  | 0.00025975 |
| 101568_at   | Prosc                | proline synthetase co-transcribec    | 836.93   | 323.63  | 2.59  | 0.00026105 |
| 94352_at    | Mbtd1                | mbt domain containing 1              | 103.59   | 314.53  | -3.04 | 0.0002613  |
| 160640_at   | Galnt11              | UDP-N-acetyl-alpha-D-galactosar      | 810.47   | 386.90  | 2.09  | 0.00026181 |
| 95701_at    | Cxhc5                | CXXC finger 5                        | 436.67   | 1136.42 | -2.60 | 0.00026212 |
| 96774_at    | Fermt2               | fermitin family homolog 2 (Droso     | 484.74   | 166.80  | 2.91  | 0.00026256 |
| 96261_at    | 2310028O11Rik        | RIKEN cDNA 2310028O11 gene           | 164.03   | 692.50  | -4.22 | 0.00026284 |
| 95016_at    | Nrp1                 | neuropilin 1                         | 6733.78  | 281.96  | 23.88 | 0.00026369 |
| 104449_at   | Glrb                 | glycine receptor, beta subunit       | 413.05   | 1457.99 | -3.53 | 0.00026373 |
| 160626_at   | Myef2                | myelin basic protein expression f    | 214.51   | 930.24  | -4.34 | 0.0002639  |
| 162358_i_at | Slc25a1              | solute carrier family 25 (mitochoi   | 1580.27  | 605.94  | 2.61  | 0.00026652 |
| 102249_at   | Avil                 | advillin                             | 10347.81 | 486.24  | 21.28 | 0.00027032 |
| 104444_at   | Ocel1                | occludin/ELL domain containing 1     | 1109.42  | 322.51  | 3.44  | 0.00027069 |
| 97490_at    | Bcl7b                | B-cell CLL/lymphoma 7B               | 507.03   | 193.21  | 2.62  | 0.00027126 |
| 102099_f_at | Kctd17               | potassium channel tetramerisatic     | 2654.17  | 1049.58 | 2.53  | 0.00027221 |
| 104651_at   | Snx14                | sorting nexin 14                     | 1161.19  | 337.67  | 3.44  | 0.0002727  |
| 104761_at   | Antxr2               | anthrax toxin receptor 2             | 1332.30  | 94.94   | 14.03 | 0.00027346 |
| 94801_at    | Pgrmc2               | progesterone receptor membran        | 1435.58  | 222.15  | 6.46  | 0.00027376 |
| 99617_at    | Sec24c               | SEC24 related gene family, memk      | 2163.67  | 949.03  | 2.28  | 0.00027433 |
| 93582_at    | Coq7                 | demethyl-Q 7                         | 824.57   | 190.79  | 4.32  | 0.00027484 |
| 94452_g_at  | Nsun2                | NOL1/NOP2/Sun domain family 2        | 1565.22  | 301.81  | 5.19  | 0.00027518 |
| 103504_at   | Ssbp2                | single-stranded DNA binding prot     | 3816.24  | 1002.27 | 3.81  | 0.00027657 |
| 104378_at   | Pon2                 | paraoxonase 2                        | 373.53   | 154.23  | 2.42  | 0.00027782 |
| 93798_at    | Atp1a1               | ATPase, Na+/K+ transporting, alp     | 10203.35 | 1613.60 | 6.32  | 0.00027786 |
| 97957_at    | Slc27a4              | solute carrier family 27 (fatty acic | 1332.00  | 418.56  | 3.18  | 0.00027805 |
| 94759_at    | Mcart6               | mitochondrial carrier triple repea   | 2916.81  | 702.40  | 4.15  | 0.00027922 |
| 104680_at   | Ramp1                | receptor (calcitonin) activity mod   | 234.43   | 1117.29 | -4.77 | 0.00027943 |
| 160900_at   | Gkap1                | G kinase anchoring protein 1         | 588.93   | 131.40  | 4.48  | 0.0002806  |

|             |                     |                                      |          |         |        |            |
|-------------|---------------------|--------------------------------------|----------|---------|--------|------------|
| 160462_f_at | Tubb3               | tubulin, beta 3                      | 9851.91  | 4721.01 | 2.09   | 0.00028071 |
| 103630_at   | Lars                | leucyl-tRNA synthetase               | 1531.13  | 400.06  | 3.83   | 0.00028081 |
| 160818_at   | Lrrfip2             | leucine rich repeat (in FLII) intera | 1316.77  | 615.28  | 2.14   | 0.00028205 |
| 93342_at    | Mki67ip             | Mki67 (FHA domain) interacting r     | 815.28   | 146.30  | 5.57   | 0.00028226 |
| 98119_at    | EG625281 /// EG664  | ribosomal protein L30 /// predict    | 3624.69  | 9050.55 | -2.50  | 0.00028314 |
| 160971_at   | Kazald1             | Kazal-type serine peptidase inhib    | 449.58   | 131.10  | 3.43   | 0.00028438 |
| 95386_at    | Lycat               | lysocardiolipin acyltransferase      | 2933.05  | 339.19  | 8.65   | 0.00028441 |
| 104135_at   | Arl3                | ADP-ribosylation factor-like 3       | 302.06   | 823.08  | -2.72  | 0.00028485 |
| 101516_at   | Cd59a               | CD59a antigen                        | 4584.40  | 387.18  | 11.84  | 0.00028667 |
| 92460_at    | Sema4f              | sema domain, immunoglobulin d        | 4335.47  | 1456.78 | 2.98   | 0.00028681 |
| 103852_at   | Ttc33               | tetratricopeptide repeat domain      | 1380.91  | 516.01  | 2.68   | 0.00028686 |
| 102224_at   | Igf1r               | insulin-like growth factor I recept  | 2116.63  | 843.31  | 2.51   | 0.00028704 |
| 160562_at   | Cct7                | chaperonin subunit 7 (eta)           | 6450.02  | 2170.83 | 2.97   | 0.00028719 |
| 99093_at    | Rps10               | ribosomal protein S10                | 1751.17  | 3626.80 | -2.07  | 0.00028732 |
| 161814_f_at | Rnf19a              | Ring finger protein 19A              | 1367.81  | 334.40  | 4.09   | 0.00028739 |
| 95591_at    | Extl3               | exostoses (multiple)-like 3          | 3114.10  | 1064.51 | 2.93   | 0.00028956 |
| 97914_at    | Hspa9               | heat shock protein 9                 | 7005.31  | 859.78  | 8.15   | 0.00028961 |
| 93752_at    | Iars                | isoleucine-tRNA synthetase           | 1432.05  | 461.97  | 3.10   | 0.00028965 |
| 95608_at    | Ctsb                | cathepsin B                          | 2356.27  | 242.53  | 9.72   | 0.00028993 |
| 95785_s_at  | Rab7                | RAB7, member RAS oncogene fam        | 70.25    | 554.60  | -7.89  | 0.00029008 |
| 101734_at   | Grid2               | glutamate receptor, ionotropic, c    | 409.79   | 873.57  | -2.13  | 0.00029029 |
| 101631_at   | Sox11               | SRY-box containing gene 11           | 336.91   | 1024.00 | -3.04  | 0.00029233 |
| 96068_at    | Immp1l              | IMP1 inner mitochondrial membe       | 98.54    | 384.19  | -3.90  | 0.00029317 |
| 162332_f_at | Mapre3              | microtubule-associated protein, l    | 1281.21  | 348.03  | 3.68   | 0.00029409 |
| 93605_r_at  | Cadm1               | cell adhesion molecule 1             | 415.31   | 187.34  | 2.22   | 0.00029425 |
| 95021_at    | Arglu1              | arginine and glutamate rich 1        | 2200.26  | 835.07  | 2.63   | 0.00029525 |
| 100576_at   | Pafah1b3            | platelet-activating factor acetylhy  | 397.54   | 966.63  | -2.43  | 0.00029652 |
| 160127_at   | Ccng1               | cyclin G1                            | 703.79   | 224.69  | 3.13   | 0.00029711 |
| 94304_at    | Anxa6               | annexin A6                           | 2856.43  | 868.30  | 3.29   | 0.00029713 |
| 93496_at    | Elovl5              | ELOVL family member 5, elongati      | 5173.14  | 1666.58 | 3.10   | 0.00029741 |
| 100751_at   | Adam10              | a disintegrin and metallopeptidas    | 102.76   | 312.92  | -3.05  | 0.00030196 |
| 101963_at   | Ctsl                | cathepsin L                          | 4402.87  | 1147.10 | 3.84   | 0.00030332 |
| 160256_at   | Tomm7               | translocase of outer mitochondri     | 842.44   | 2507.62 | -2.98  | 0.00030346 |
| 102873_at   | Tap2                | transporter 2, ATP-binding casset    | 698.70   | 285.29  | 2.45   | 0.00030388 |
| 94932_at    | Pdgfra              | platelet derived growth factor, al   | 2373.49  | 507.64  | 4.68   | 0.00030398 |
| 104036_at   | Dpp7                | dipeptidylpeptidase 7                | 2214.24  | 436.27  | 5.08   | 0.00030505 |
| 95462_at    | Bzw2                | basic leucine zipper and W2 dom      | 560.77   | 1553.80 | -2.77  | 0.00030536 |
| 100917_at   | Wdr55               | WD repeat domain 55                  | 593.73   | 270.75  | 2.19   | 0.00030551 |
| 97594_r_at  | Flii                | flightless I homolog (Drosophila)    | 11200.55 | 2374.22 | 4.72   | 0.00030554 |
| 161059_at   | Slc6a1              | solute carrier family 6 (neurotran   | 125.35   | 849.70  | -6.78  | 0.00030555 |
| 162263_f_at | Lamb1-1             | laminin B1 subunit 1                 | 805.94   | 367.33  | 2.19   | 0.00030591 |
| 98904_at    | Mrpl35              | mitochondrial ribosomal protein      | 1062.88  | 461.59  | 2.30   | 0.00030593 |
| 101078_at   | Bsg                 | basigin                              | 1326.99  | 3223.81 | -2.43  | 0.00030634 |
| 98025_at    | Evi2a               | ecotropic viral integration site 2a  | 37.03    | 76.52   | -2.07  | 0.00030641 |
| 98346_at    | Tsku                | tsukushin                            | 140.66   | 315.54  | -2.24  | 0.00030668 |
| 92555_at    | Tspan6              | tetraspanin 6                        | 202.58   | 455.34  | -2.25  | 0.00030733 |
| 102773_at   | Car8 /// LOC676792  | carbonic anhydrase 8 /// similar t   | 29.40    | 382.23  | -13.00 | 0.00030759 |
| 96272_at    | Ptprf               | protein tyrosine phosphatase, re     | 2495.17  | 614.23  | 4.06   | 0.00030777 |
| 94017_s_at  | LOC100043293 /// Sf | splicing factor, arginine/serine-ric | 2323.35  | 6254.36 | -2.69  | 0.00030985 |
| 100539_at   | Acot7               | acyl-CoA thioesterase 7              | 5925.41  | 2439.38 | 2.43   | 0.00031007 |
| 96614_at    | 4933426M11Rik       | RIKEN cDNA 4933426M11 gene           | 1919.17  | 416.03  | 4.61   | 0.00031011 |
| 100027_s_at | Pex14               | peroxisomal biogenesis factor 14     | 4610.30  | 1841.64 | 2.50   | 0.00031015 |
| 102980_at   | LOC100045684        | similar to N-myristoyltransferase    | 2164.67  | 362.66  | 5.97   | 0.00031055 |
| 92349_at    | Igfbpl1             | insulin-like growth factor binding   | 219.72   | 644.30  | -2.93  | 0.00031164 |
| 97485_at    | Pcyox1              | prenylcysteine oxidase 1             | 4371.22  | 884.98  | 4.94   | 0.00031243 |



|             |                     |                                     |         |         |       |            |
|-------------|---------------------|-------------------------------------|---------|---------|-------|------------|
| 160385_at   | Gcsh                | glycine cleavage system protein F   | 1860.72 | 846.51  | 2.20  | 0.00031267 |
| 98626_at    | Trappc2l            | trafficking protein particle compl  | 309.41  | 1555.16 | -5.03 | 0.00031289 |
| 92817_at    | Imp3                | IMP3, U3 small nucleolar ribonuc    | 431.56  | 1043.60 | -2.42 | 0.00031306 |
| 93261_at    | Lgmn                | legumain                            | 3877.46 | 474.22  | 8.18  | 0.00031378 |
| 100128_at   | Cdc2a               | cell division cycle 2 homolog A (S  | 243.36  | 715.01  | -2.94 | 0.00031641 |
| 99529_f_at  | Rnf138              | ring finger protein 138             | 36.82   | 88.64   | -2.41 | 0.00031745 |
| 97841_at    | Chmp2a              | chromatin modifying protein 2A      | 361.69  | 1241.61 | -3.43 | 0.00032031 |
| 160693_at   | Pip4k2c             | phosphatidylinositol-5-phosphat     | 751.57  | 287.72  | 2.61  | 0.00032198 |
| 94030_at    | Commd2              | COMM domain containing 2            | 296.53  | 649.75  | -2.19 | 0.00032204 |
| 99608_at    | Prdx2               | peroxiredoxin 2                     | 994.55  | 349.10  | 2.85  | 0.00032223 |
| 104350_at   | Shc1                | src homology 2 domain-containir     | 1278.37 | 206.72  | 6.18  | 0.00032268 |
| 102197_at   | Nucb2               | nucleobindin 2                      | 234.03  | 81.45   | 2.87  | 0.00032275 |
| 103671_at   | Htatip2             | HIV-1 tat interactive protein 2, hc | 1593.70 | 122.74  | 12.98 | 0.00032316 |
| 99048_g_at  | Mobp                | myelin-associated oligodendrocy     | 79.42   | 459.61  | -5.79 | 0.00032341 |
| 104116_at   | Stbd1               | starch binding domain 1             | 1726.79 | 80.95   | 21.33 | 0.00032443 |
| 103311_at   | Osbp15              | oxysterol binding protein-like 5    | 4270.01 | 894.40  | 4.77  | 0.00032551 |
| 103712_at   | R3hdm1              | R3H domain 1 (binds single-stran    | 1680.33 | 621.08  | 2.71  | 0.00032555 |
| 101503_at   | Dpysl3              | dihydropyrimidinase-like 3          | 320.26  | 738.99  | -2.31 | 0.00032659 |
| 94228_at    | Xpo1                | exportin 1, CRM1 homolog (yeast)    | 1382.01 | 593.68  | 2.33  | 0.00032685 |
| 102123_at   | Lipa                | lysosomal acid lipase A             | 889.32  | 321.79  | 2.76  | 0.00032861 |
| 103656_at   | Lancl1              | LanC (bacterial lantibiotic synthe  | 4576.15 | 1417.42 | 3.23  | 0.00032913 |
| 104461_at   | Pik3ca              | phosphatidylinositol 3-kinase, cat  | 1114.38 | 465.67  | 2.39  | 0.00032923 |
| 161882_f_at | Rdh13               | Retinol dehydrogenase 13 (all-tra   | 467.22  | 204.38  | 2.29  | 0.00033184 |
| 102927_s_at | Htt                 | huntingtin                          | 1951.59 | 731.82  | 2.67  | 0.00033311 |
| 93094_at    | Cdr2                | cerebellar degeneration-related 2   | 1024.99 | 143.69  | 7.13  | 0.00033324 |
| 97863_at    | Hgsnat              | heparan-alpha-glucosaminide N-4     | 2541.02 | 763.79  | 3.33  | 0.00033486 |
| 102412_at   | Nup107              | nucleoporin 107                     | 1982.95 | 913.36  | 2.17  | 0.00033525 |
| 93559_at    | Apex1               | apurinic/apyrimidinic endonuclea    | 473.92  | 957.98  | -2.02 | 0.00033615 |
| 97421_at    | Smc2                | structural maintenance of chrom     | 111.49  | 349.42  | -3.13 | 0.0003371  |
| 92511_at    | Aanat               | arylalkylamine N-acetyltransfera    | 179.22  | 373.28  | -2.08 | 0.00033755 |
| 101958_f_at | Tfdp1               | transcription factor Dp 1           | 271.91  | 550.83  | -2.03 | 0.00033772 |
| 103711_at   | Casp9               | caspase 9                           | 575.25  | 239.05  | 2.41  | 0.00033825 |
| 93589_at    | Entpd4 /// LOC10004 | ectonucleoside triphosphate dipt    | 4467.47 | 1420.42 | 3.15  | 0.00034186 |
| 96613_at    | 5730536A07Rik       | RIKEN cDNA 5730536A07 gene          | 223.28  | 557.02  | -2.49 | 0.0003442  |
| 103717_at   | Wwp2                | WW domain containing E3 ubiqu       | 3534.91 | 378.79  | 9.33  | 0.00034431 |
| 104446_f_at | 4933428G09Rik       | RIKEN cDNA 4933428G09 gene          | 422.40  | 160.74  | 2.63  | 0.00034501 |
| 160949_at   | Parg                | poly (ADP-ribose) glycohydrolase    | 1306.92 | 332.04  | 3.94  | 0.00034579 |
| 102360_at   | Mthfr               | 5,10-methylenetetrahydrofolate      | 839.90  | 248.24  | 3.38  | 0.00034741 |
| 96806_at    | Lpin2               | lipin 2                             | 824.41  | 380.45  | 2.17  | 0.00034802 |
| 161616_f_at | Rprm                | reprimin 1, TP53 dependent G2 arr   | 2092.84 | 222.97  | 9.39  | 0.00034808 |
| 97434_at    | Nsun4               | NOL1/NOP2/Sun domain family,        | 425.21  | 101.17  | 4.20  | 0.00034821 |
| 103260_at   | Dock5               | dedicator of cytokinesis 5          | 1978.18 | 320.37  | 6.17  | 0.00034936 |
| 101058_at   | Amy1                | amylase 1, salivary                 | 309.89  | 81.32   | 3.81  | 0.00034943 |
| 101966_s_at | Rnf13               | ring finger protein 13              | 120.35  | 531.64  | -4.42 | 0.00034946 |
| 93083_at    | Anxa5               | annexin A5                          | 4260.51 | 974.25  | 4.37  | 0.00034971 |
| 96667_at    | Vps41               | vacuolar protein sorting 41 (yeas   | 2599.61 | 985.85  | 2.64  | 0.00035158 |
| 99366_at    | Pqlc3               | PQ loop repeat containing           | 2666.51 | 107.52  | 24.80 | 0.00035198 |
| 102794_at   | Cxcr4               | chemokine (C-X-C motif) recepto     | 46.57   | 114.31  | -2.45 | 0.00035492 |
| 95586_at    | P2rx4               | purinergic receptor P2X, ligand-g   | 2510.39 | 257.61  | 9.75  | 0.00035499 |
| 160239_at   | Psmd6               | proteasome (prosome, macropai       | 1063.19 | 2237.96 | -2.10 | 0.00035507 |
| 104374_at   | Serpina3n           | serine (or cysteine) peptidase inh  | 3841.37 | 1015.03 | 3.78  | 0.00035535 |
| 96065_at    | Lxn                 | latexin                             | 1186.53 | 412.48  | 2.88  | 0.00035561 |
| 101560_at   | Emb                 | embigin                             | 3234.65 | 335.61  | 9.64  | 0.00035585 |
| 162341_r_at | Akr1b3              | aldo-keto reductase family 1, me    | 1836.33 | 3788.77 | -2.06 | 0.00035641 |
| 162034_r_at | Antxr2              | Anthrax toxin receptor 2            | 153.20  | 55.57   | 2.76  | 0.00035679 |

|             |               |                                              |          |         |       |            |
|-------------|---------------|----------------------------------------------|----------|---------|-------|------------|
| 94208_at    | LOC100046302  | /// Pc protein disulfide isomerase assoc     | 191.36   | 926.51  | -4.84 | 0.00035694 |
| 93111_at    | Kpnb1         | karyopherin (importin) beta 1                | 3807.74  | 1256.23 | 3.03  | 0.00035717 |
| 97486_at    | U2af1         | U2 small nuclear ribonucleoprote             | 288.57   | 855.99  | -2.97 | 0.00035788 |
| 93493_at    | Ddx5          | DEAD (Asp-Glu-Ala-Asp) box poly              | 505.19   | 1864.38 | -3.69 | 0.00035816 |
| 96738_at    | Adam9         | a disintegrin and metallopeptida             | 755.95   | 175.37  | 4.31  | 0.00035854 |
| 95632_f_at  | LOC637711     | /// Mvk mevalonate kinase /// similar to     | 1588.11  | 387.95  | 4.09  | 0.00035862 |
| 160846_at   | Nek6          | NIMA (never in mitosis gene a)-re            | 707.51   | 335.06  | 2.11  | 0.00035927 |
| 98005_at    | Pkia          | protein kinase inhibitor, alpha              | 254.03   | 721.53  | -2.84 | 0.00036003 |
| 102389_s_at | Gap43         | growth associated protein 43                 | 7702.72  | 3052.68 | 2.52  | 0.00036011 |
| 98766_at    | Sh3bp5        | SH3-domain binding protein 5 (B              | 94.72    | 220.40  | -2.33 | 0.00036271 |
| 99186_at    | Ccna2         | cyclin A2                                    | 742.66   | 1643.74 | -2.21 | 0.0003628  |
| 98531_g_at  | Gas5          | growth arrest specific 5                     | 1190.63  | 391.25  | 3.04  | 0.00036282 |
| 96578_r_at  | Ubap2l        | ubiquitin associated protein 2-lik           | 871.00   | 376.35  | 2.31  | 0.00036298 |
| 160484_at   | Rtn4          | reticulon 4                                  | 7207.87  | 2943.38 | 2.45  | 0.00036301 |
| 103023_at   | Lcat          | lecithin cholesterol acyltransfera           | 205.55   | 878.32  | -4.27 | 0.00036584 |
| 160916_at   | Eepd1         | endonuclease/exonuclease/phos                | 609.61   | 177.19  | 3.44  | 0.00036777 |
| 94492_at    | Dstn          | destrin                                      | 10366.63 | 4783.65 | 2.17  | 0.00036796 |
| 94384_at    | Ier3          | immediate early response 3                   | 148.83   | 300.98  | -2.02 | 0.00036821 |
| 102819_at   | Nap1l2        | nucleosome assembly protein 1-l              | 335.04   | 764.89  | -2.28 | 0.00037055 |
| 93020_at    | Bex1          | brain expressed gene 1                       | 114.27   | 301.26  | -2.64 | 0.00037109 |
| 103667_at   | Atp13a3       | ATPase type 13A3                             | 915.37   | 362.59  | 2.52  | 0.00037234 |
| 97415_at    | Rab3d         | RAB3D, member RAS oncogene f                 | 2995.55  | 589.76  | 5.08  | 0.00037293 |
| 92585_at    | Map2k1        | mitogen-activated protein kinase             | 1700.31  | 611.49  | 2.78  | 0.00037396 |
| 161389_f_at | Asnsd1        | /// LOC67449 asparagine synthetase domain cc | 508.79   | 174.30  | 2.92  | 0.00037586 |
| 101069_g_at | Mkrn1         | makorin, ring finger protein, 1              | 212.45   | 584.75  | -2.75 | 0.00037601 |
| 101890_f_at | Dnajc2        | DnaJ (Hsp40) homolog, subfamily              | 1537.34  | 619.43  | 2.48  | 0.00037609 |
| 161084_at   | Zfp612        | zinc finger protein 612                      | 583.46   | 62.77   | 9.29  | 0.00037757 |
| 102029_at   | Il16          | interleukin 16                               | 218.02   | 622.05  | -2.85 | 0.00037888 |
| 95139_at    | Wipi2         | WD repeat domain, phosphoinos                | 729.18   | 314.59  | 2.32  | 0.00037917 |
| 96271_at    | Tmem123       | transmembrane protein 123                    | 171.19   | 414.33  | -2.42 | 0.00038001 |
| 97890_at    | Sgk1          | serum/glucocorticoid regulated k             | 263.41   | 930.79  | -3.53 | 0.00038006 |
| 96791_at    | 1500005K14Rik | RIKEN cDNA 1500005K14 gene                   | 3133.87  | 1156.42 | 2.71  | 0.0003802  |
| 161519_f_at | ---           | ---                                          | 2271.35  | 1031.27 | 2.20  | 0.00038091 |
| 102767_at   | Gng12         | guanine nucleotide binding prote             | 519.83   | 1055.80 | -2.03 | 0.00038238 |
| 161817_f_at | Spsb1         | splA/ryanodine receptor domain               | 836.98   | 324.79  | 2.58  | 0.0003824  |
| 99102_at    | Usp9x         | ubiquitin specific peptidase 9, X c          | 443.97   | 199.44  | 2.23  | 0.00038449 |
| 160156_at   | 0910001A06Rik | RIKEN cDNA 0910001A06 gene                   | 156.37   | 404.17  | -2.58 | 0.00038891 |
| 103767_f_at | Rrm2b         | ribonucleotide reductase M2 B (T             | 1321.86  | 524.24  | 2.52  | 0.00038957 |
| 94694_at    | Pcsk1         | proprotein convertase subtilisin/            | 450.63   | 92.55   | 4.87  | 0.00038968 |
| 103345_at   | Spna2         | spectrin alpha 2                             | 4352.81  | 1380.75 | 3.15  | 0.00039046 |
| 93372_at    | Anp32a        | acidic (leucine-rich) nuclear phos           | 57.88    | 170.28  | -2.94 | 0.00039081 |
| 97937_at    | Klf5          | Kruppel-like factor 5                        | 322.27   | 126.84  | 2.54  | 0.00039138 |
| 160356_at   | Cmpk1         | cytidine monophosphate (UMP-C                | 2358.20  | 1111.33 | 2.12  | 0.00039175 |
| 96338_at    | Egln2         | EGL nine homolog 2 (C. elegans)              | 6718.52  | 2715.85 | 2.47  | 0.00039203 |
| 93324_at    | Zfp36l1       | zinc finger protein 36, C3H type-I           | 258.24   | 833.75  | -3.23 | 0.00039209 |
| 97124_at    | LOC14210      | hypothetical LOC14210                        | 46.34    | 457.09  | -9.86 | 0.00039253 |
| 94056_at    | Scd1          | stearoyl-Coenzyme A desaturase               | 8102.10  | 2157.43 | 3.76  | 0.00039393 |
| 95529_at    | Dbnl          | drebrin-like                                 | 3043.10  | 790.05  | 3.85  | 0.00039424 |
| 99632_at    | Mad2l1        | MAD2 (mitotic arrest deficient, h            | 230.00   | 467.53  | -2.03 | 0.00039464 |
| 160876_at   | Bcap29        | B-cell receptor-associated protei            | 1442.01  | 243.22  | 5.93  | 0.00039503 |
| 103497_at   | BC025546      | cDNA sequence BC025546                       | 378.82   | 87.17   | 4.35  | 0.00039537 |
| 160582_at   | Mybpc3        | myosin binding protein C, cardiac            | 438.30   | 1942.32 | -4.43 | 0.00039551 |
| 102063_at   | Pdpk1         | 3-phosphoinositide dependent pi              | 848.82   | 168.93  | 5.02  | 0.00039591 |
| 101062_at   | Hmox2         | heme oxygenase (decycling) 2                 | 505.39   | 238.30  | 2.12  | 0.00039624 |
| 96677_at    | Setd8         | SET domain containing (lysine me             | 1732.78  | 545.07  | 3.18  | 0.00039659 |

|             |                     |                                      |          |         |        |            |
|-------------|---------------------|--------------------------------------|----------|---------|--------|------------|
| 160623_at   | Cdkl2               | cyclin-dependent kinase-like 2 (C    | 492.43   | 101.65  | 4.84   | 0.00039755 |
| 102012_at   | Skap2               | src family associated phosphoprc     | 714.99   | 355.69  | 2.01   | 0.00039761 |
| 97593_f_at  | Flii                | flightless I homolog (Drosophila)    | 5667.06  | 866.80  | 6.54   | 0.00039822 |
| 92277_at    | Myo1e               | myosin IE                            | 233.14   | 72.32   | 3.22   | 0.00039848 |
| 99845_at    | Slc1a6              | solute carrier family 1 (high affini | 473.10   | 2700.31 | -5.71  | 0.00039864 |
| 160905_s_at | A030009H04Rik       | RIKEN cDNA A030009H04 gene           | 105.28   | 467.44  | -4.44  | 0.00040015 |
| 103006_at   | Atf5                | activating transcription factor 5    | 658.65   | 245.97  | 2.68   | 0.00040039 |
| 104747_at   | Slc1a1              | solute carrier family 1 (neuronal/   | 61.92    | 128.73  | -2.08  | 0.00040186 |
| 100116_at   | 2810417H13Rik       | RIKEN cDNA 2810417H13 gene           | 77.56    | 292.52  | -3.77  | 0.00040485 |
| 97267_at    | 6330407G11Rik       | RIKEN cDNA 6330407G11 gene           | 2002.39  | 890.31  | 2.25   | 0.00040543 |
| 160281_at   | Lsm14a              | LSM14 homolog A (SCD6, S. cerev      | 445.31   | 952.87  | -2.14  | 0.00040598 |
| 99603_g_at  | Klf10               | Kruppel-like factor 10               | 1439.58  | 503.14  | 2.86   | 0.00040761 |
| 103326_at   | Tbcel               | tubulin folding cofactor E-like      | 1193.02  | 375.51  | 3.18   | 0.00040852 |
| 93748_at    | Grin1a              | glutamate receptor, ionotropic, N    | 3791.78  | 1708.02 | 2.22   | 0.00040864 |
| 98843_at    | Zic2                | zinc finger protein of the cerebell  | 88.02    | 192.84  | -2.19  | 0.00040908 |
| 98335_at    | Rfc1                | replication factor C (activator 1) 1 | 989.61   | 321.25  | 3.08   | 0.00040926 |
| 102983_at   | Smad1               | MAD homolog 1 (Drosophila)           | 2227.65  | 635.62  | 3.50   | 0.00040938 |
| 99047_at    | Mobp                | myelin-associated oligodendrocy      | 155.74   | 1217.07 | -7.81  | 0.00040968 |
| 94338_g_at  | Gas2                | growth arrest specific 2             | 613.99   | 130.02  | 4.72   | 0.00041035 |
| 94464_at    | Clcn3               | chloride channel 3                   | 1703.43  | 353.94  | 4.81   | 0.00041498 |
| 103756_at   | BC023829 /// LOC100 | cDNA sequence BC023829 /// sin       | 2408.03  | 1096.74 | 2.20   | 0.00041606 |
| 100139_at   | Pcsk1n              | proprotein convertase subtilisin/    | 4566.79  | 1117.08 | 4.09   | 0.00041921 |
| 99095_at    | LOC100048299 /// M  | Max protein /// similar to Myn pr    | 177.96   | 663.58  | -3.73  | 0.00041992 |
| 104071_at   | Tnpo2               | transportin 2 (importin 3, karyop    | 4695.17  | 1937.15 | 2.42   | 0.00042194 |
| 95119_at    | 1110038D17Rik       | RIKEN cDNA 1110038D17 gene           | 1337.31  | 399.34  | 3.35   | 0.00042216 |
| 96829_at    | D19Wsu162e          | DNA segment, Chr 19, Wayne Sta       | 2500.02  | 728.29  | 3.43   | 0.00042338 |
| 93984_at    | Atpif1              | ATPase inhibitory factor 1           | 1956.22  | 4356.11 | -2.23  | 0.00042381 |
| 160171_f_at | Acot9               | acyl-CoA thioesterase 9              | 1460.65  | 426.58  | 3.42   | 0.00042664 |
| 103027_at   | 1810030O07Rik       | RIKEN cDNA 1810030O07 gene           | 1083.87  | 373.06  | 2.91   | 0.00042754 |
| 101055_at   | Ctsa                | cathepsin A                          | 1811.87  | 812.25  | 2.23   | 0.00043056 |
| 100990_g_at | Itgb1bp1            | integrin beta 1 binding protein 1    | 105.28   | 537.10  | -5.10  | 0.00043087 |
| 100635_at   | Sar1a               | SAR1 gene homolog A (S. cerevisi     | 4769.77  | 1618.40 | 2.95   | 0.00043199 |
| 161119_at   | Epha5               | Eph receptor A5                      | 283.50   | 64.29   | 4.41   | 0.0004325  |
| 95526_at    | Xpo7                | exportin 7                           | 1220.45  | 543.82  | 2.24   | 0.00043277 |
| 161613_at   | Chmp7               | CHMP family, member 7                | 1275.45  | 454.14  | 2.81   | 0.00043415 |
| 103748_at   | 4933407C03Rik       | RIKEN cDNA 4933407C03 gene           | 5046.28  | 625.37  | 8.07   | 0.00043429 |
| 101502_at   | Tgif1               | TG interacting factor 1              | 104.57   | 230.45  | -2.20  | 0.00043531 |
| 96653_at    | Gm1604 /// LOC1000  | ribonuclease T2B /// gene model      | 387.68   | 1916.38 | -4.94  | 0.00043535 |
| 96208_at    | Grfl1               | glucocorticoid receptor DNA binc     | 1197.28  | 561.32  | 2.13   | 0.0004356  |
| 102047_at   | LOC100045684 /// Ni | N-myristoyltransferase 1 /// simi    | 2447.51  | 585.11  | 4.18   | 0.00043566 |
| 97325_at    | LOC100044756 /// Px | PX domain containing serine/thre     | 1658.28  | 465.81  | 3.56   | 0.00043636 |
| 99645_at    | 4921506J03Rik       | RIKEN cDNA 4921506J03 gene           | 1084.96  | 2197.38 | -2.03  | 0.00043658 |
| 100912_at   | Dph5                | DPH5 homolog (S. cerevisiae)         | 378.94   | 168.61  | 2.25   | 0.00043731 |
| 98544_at    | Guk1                | guanylate kinase 1                   | 2603.54  | 768.30  | 3.39   | 0.00043805 |
| 94005_at    | Pmpcb               | peptidase (mitochondrial process     | 636.64   | 251.92  | 2.53   | 0.00043836 |
| 97311_at    | 6720456B07Rik       | RIKEN cDNA 6720456B07 gene           | 10456.69 | 4649.72 | 2.25   | 0.00043859 |
| 97160_at    | Sparc               | secreted acidic cysteine rich glycc  | 469.70   | 1291.09 | -2.75  | 0.00044025 |
| 94870_f_at  | Sar1b               | SAR1 gene homolog B (S. cerevisi     | 369.01   | 895.70  | -2.43  | 0.00044042 |
| 161221_f_at | Asns                | asparagine synthetase                | 750.61   | 246.63  | 3.04   | 0.0004405  |
| 92872_at    | Necap1              | NECAP endocytosis associated 1       | 4528.35  | 1530.33 | 2.96   | 0.00044392 |
| 103532_at   | Eomes               | eomesodermin homolog (Xenopt         | 25.91    | 56.60   | -2.18  | 0.00044392 |
| 104709_at   | Sec23a              | SEC23A (S. cerevisiae)               | 1764.19  | 685.38  | 2.57   | 0.00044408 |
| 92633_at    | Ctsz                | cathepsin Z                          | 692.93   | 113.63  | 6.10   | 0.00044815 |
| 97474_r_at  | Ptn                 | pleiotrophin                         | 52.23    | 290.86  | -5.57  | 0.00044826 |
| 97203_at    | Marcksl1            | MARCKS-like 1                        | 195.18   | 3813.73 | -19.54 | 0.00044889 |

|             |                    |                                     |         |         |        |            |
|-------------|--------------------|-------------------------------------|---------|---------|--------|------------|
| 94895_at    | Ythdf2             | YTH domain family 2                 | 107.02  | 371.46  | -3.47  | 0.00044907 |
| 102144_f_at | ---                | ---                                 | 74.07   | 311.49  | -4.21  | 0.00045095 |
| 100690_at   | Th                 | tyrosine hydroxylase                | 1619.87 | 352.12  | 4.60   | 0.00045142 |
| 160105_r_at | Pigk               | phosphatidylinositol glycan anchor  | 494.02  | 144.32  | 3.42   | 0.0004528  |
| 93747_at    | Ptplad1            | protein tyrosine phosphatase-like   | 9476.94 | 3961.85 | 2.39   | 0.0004529  |
| 98418_at    | Dvl1               | dishevelled, dsh homolog 1 (Dros    | 2942.56 | 1397.49 | 2.11   | 0.00045312 |
| 161006_at   | Slco3a1            | solute carrier organic anion trans  | 2688.50 | 364.42  | 7.38   | 0.00045385 |
| 101591_at   | Xpnpep1            | X-prolyl aminopeptidase (aminop     | 272.42  | 658.77  | -2.42  | 0.00045393 |
| 160540_at   | Bag1               | Bcl2-associated athanogene 1        | 1254.74 | 574.20  | 2.19   | 0.00045394 |
| 94739_at    | Trpc1              | transient receptor potential catio  | 66.58   | 144.21  | -2.17  | 0.00045633 |
| 101977_at   | LOC100047647 /// N | nudix (nucleotide diphosphate lir   | 7629.01 | 2642.69 | 2.89   | 0.00045658 |
| 101992_at   | Psmb6              | proteasome (prosome, macropai       | 664.00  | 1426.92 | -2.15  | 0.00045699 |
| 100621_at   | Rnh1               | ribonuclease/angiogenin inhibito    | 2093.34 | 764.43  | 2.74   | 0.000457   |
| 93250_r_at  | Hmgb2 /// LOC66635 | high mobility group box 2 /// sim   | 30.12   | 236.05  | -7.84  | 0.00045717 |
| 97526_at    | Ap3m1              | adaptor-related protein complex     | 1526.04 | 464.55  | 3.28   | 0.0004574  |
| 102395_at   | Pmp22              | peripheral myelin protein           | 3362.30 | 236.16  | 14.24  | 0.0004576  |
| 101892_f_at | Aktip              | thymoma viral proto-oncogene 1      | 1146.70 | 201.99  | 5.68   | 0.00046048 |
| 95752_at    | Sbds               | Shwachman-Bodian-Diamond syr        | 4191.31 | 1324.88 | 3.16   | 0.00046053 |
| 93536_at    | Bax                | Bcl2-associated X protein           | 177.24  | 697.05  | -3.93  | 0.00046068 |
| 97884_at    | Mrps11             | mitochondrial ribosomal protein     | 198.72  | 486.92  | -2.45  | 0.00046349 |
| 160836_at   | Sema4d             | sema domain, immunoglobulin d       | 2060.01 | 789.13  | 2.61   | 0.00046454 |
| 94374_at    | Wdr13              | WD repeat domain 13                 | 1565.46 | 717.25  | 2.18   | 0.00046511 |
| 98084_at    | Arl2bp             | ADP-ribosylation factor-like 2 bin  | 1477.26 | 3189.66 | -2.16  | 0.00046512 |
| 97352_f_at  | Cox6b2             | cytochrome c oxidase subunit VI     | 108.71  | 242.81  | -2.23  | 0.00046524 |
| 94469_at    | Mat2b              | methionine adenosyltransferase      | 2603.99 | 1134.46 | 2.30   | 0.00046534 |
| 95698_at    | Ndufb7             | NADH dehydrogenase (ubiquinor       | 1254.07 | 3106.38 | -2.48  | 0.00046652 |
| 161765_f_at | Rgs10              | regulator of G-protein signalling : | 2631.15 | 669.61  | 3.93   | 0.00046677 |
| 162145_r_at | Pgs1               | phosphatidylglycerophosphate sy     | 905.37  | 376.18  | 2.41   | 0.00047053 |
| 95061_at    | Bcas2              | breast carcinoma amplified sequ     | 182.86  | 70.23   | 2.60   | 0.00047387 |
| 161171_at   | Dusp8              | dual specificity phosphatase 8      | 758.37  | 333.37  | 2.27   | 0.00047668 |
| 102984_g_at | Smad1              | MAD homolog 1 (Drosophila)          | 3737.58 | 1343.39 | 2.78   | 0.00047846 |
| 101934_at   | Fez2               | fasciculation and elongation prot   | 1286.83 | 511.57  | 2.52   | 0.00047954 |
| 101932_at   | Ptpre              | protein tyrosine phosphatase, re    | 1725.63 | 423.54  | 4.07   | 0.00048007 |
| 99046_at    | Mobp               | myelin-associated oligodendrocy     | 26.61   | 280.52  | -10.54 | 0.00048437 |
| 101060_at   | Pdia3              | protein disulfide isomerase assoc   | 321.24  | 840.12  | -2.62  | 0.00048528 |
| 103406_at   | Gpn1               | GPN-loop GTPase 1                   | 5260.89 | 865.98  | 6.08   | 0.0004855  |
| 104334_at   | 2310004I24Rik      | RIKEN cDNA 2310004I24 gene          | 1586.73 | 648.45  | 2.45   | 0.00048935 |
| 104212_at   | Lrpprc             | leucine-rich PPR-motif containi     | 3192.57 | 617.51  | 5.17   | 0.00048999 |
| 98077_at    | Snrpd3             | small nuclear ribonucleoprotein I   | 114.55  | 265.80  | -2.32  | 0.00049051 |
| 93188_at    | Dkk3               | dickkopf homolog 3 (Xenopus lae     | 688.98  | 293.23  | 2.35   | 0.0004913  |
| 92408_at    | D1Ert53e           | DNA segment, Chr 1, ERATO Doi !     | 82.04   | 191.57  | -2.34  | 0.00049147 |
| 104302_f_at | Commd9             | COMM domain containing 9            | 1337.55 | 280.89  | 4.76   | 0.00049165 |
| 93159_at    | Syt2               | synaptotagmin II                    | 6329.40 | 2431.25 | 2.60   | 0.00049214 |
| 94954_at    | Anapc4             | anaphase promoting complex sul      | 2850.15 | 753.65  | 3.78   | 0.00049448 |
| 93682_at    | Ldb2               | LIM domain binding 2                | 4889.52 | 937.87  | 5.21   | 0.00050296 |
| 160547_s_at | Txnip              | thioredoxin interacting protein     | 637.40  | 1356.83 | -2.13  | 0.00050479 |
| 96110_at    | Cbr1               | carbonyl reductase 1                | 1266.88 | 556.97  | 2.27   | 0.00050703 |
| 103298_at   | Speg               | SPEG complex locus                  | 269.54  | 114.37  | 2.36   | 0.0005103  |
| 93203_f_at  | Foxn2              | forkhead box N2                     | 34.66   | 110.33  | -3.18  | 0.00051167 |
| 97834_g_at  | Pfkip              | phosphofructokinase, platelet       | 5618.29 | 241.43  | 23.27  | 0.00051267 |
| 103531_f_at | Ero1lb             | ERO1-like beta (S. cerevisiae)      | 1120.24 | 157.72  | 7.10   | 0.0005169  |
| 101580_at   | Cox7b              | cytochrome c oxidase subunit VII    | 767.97  | 1917.81 | -2.50  | 0.00051824 |
| 160328_at   | Lonp1              | lon peptidase 1, mitochondrial      | 1625.11 | 717.12  | 2.27   | 0.00051841 |
| 100089_at   | Ppic               | peptidylprolyl isomerase C          | 167.36  | 571.07  | -3.41  | 0.00051852 |
| 104285_at   | Hmgcr              | 3-hydroxy-3-methylglutaryl-Coen     | 1452.70 | 587.97  | 2.47   | 0.00051881 |

|             |               |                                                 |         |          |       |            |
|-------------|---------------|-------------------------------------------------|---------|----------|-------|------------|
| 98094_f_at  | Amfr          | LOC1000462 autocrine motility factor receptor   | 2831.54 | 1114.40  | 2.54  | 0.0005236  |
| 97915_at    | Plekhb2       | pleckstrin homology domain containing           | 6160.49 | 2427.76  | 2.54  | 0.00052416 |
| 96269_at    | Idi1          | isopentenyl-diphosphate delta isomerase         | 2783.51 | 1224.71  | 2.27  | 0.00052466 |
| 93697_at    | Cbx4          | chromobox homolog 4 (Drosophila)                | 347.50  | 853.26   | -2.46 | 0.00052807 |
| 94501_at    | Sgpp1         | sphingosine-1-phosphate phosphatase             | 577.82  | 216.21   | 2.67  | 0.00053293 |
| 96283_at    | Itn2c         | integral membrane protein 2C                    | 4557.62 | 2064.07  | 2.21  | 0.00053431 |
| 96890_at    | Lonp2         | lon peptidase 2, peroxisomal                    | 2384.93 | 751.09   | 3.18  | 0.00053729 |
| 101913_at   | Clcn5         | chloride channel 5                              | 2100.17 | 285.45   | 7.36  | 0.0005374  |
| 161617_f_at | ---           | ---                                             | 60.55   | 29.67    | 2.04  | 0.00053788 |
| 101088_f_at | Cnbp          | cellular nucleic acid binding protein           | 932.90  | 1980.29  | -2.12 | 0.00053845 |
| 94485_at    | Peci          | peroxisomal delta3, delta2-enoyl-CoA synthase   | 1659.01 | 592.35   | 2.80  | 0.00053852 |
| 95111_i_at  | Ppil2         | peptidylprolyl isomerase (cyclophilin)          | 141.81  | 42.58    | 3.33  | 0.00053853 |
| 94144_g_at  | Gfap          | glial fibrillary acidic protein                 | 259.75  | 940.76   | -3.62 | 0.00053864 |
| 161806_r_at | Atp6ap1       | ATPase, H+ transporting, lysosomal              | 464.19  | 190.02   | 2.44  | 0.00053865 |
| 93565_at    | Klc1          | kinesin light chain 1                           | 5698.01 | 2537.71  | 2.25  | 0.00053867 |
| 99577_at    | Kitl          | kit ligand                                      | 428.75  | 989.45   | -2.31 | 0.00053868 |
| 92515_at    | Isl1          | ISL1 transcription factor, LIM/homeobox         | 327.52  | 158.69   | 2.06  | 0.00054186 |
| 97227_at    | Gna12         | guanine nucleotide binding protein 12           | 47.69   | 113.78   | -2.39 | 0.00054251 |
| 96112_at    | Etfa          | electron transferring flavoprotein              | 1296.67 | 546.78   | 2.37  | 0.0005466  |
| 98982_at    | Tmpo          | thymopoietin                                    | 404.71  | 995.25   | -2.46 | 0.00055152 |
| 93414_at    | Abcb1b        | ATP-binding cassette, sub-family B              | 51.59   | 25.42    | 2.03  | 0.00055325 |
| 104161_at   | Cpsf2         | cleavage and polyadenylation specificity factor | 731.76  | 247.42   | 2.96  | 0.00055371 |
| 101437_at   | Slk           | STE20-like kinase (yeast)                       | 257.61  | 125.28   | 2.06  | 0.00055458 |
| 98300_at    | Cacna2d3      | calcium channel, voltage-dependent              | 528.88  | 1068.14  | -2.02 | 0.00056039 |
| 102305_at   | Gpr371        | G protein-coupled receptor 37-like              | 882.38  | 2949.42  | -3.34 | 0.00056328 |
| 94944_at    | Prkar1b       | protein kinase, cAMP dependent                  | 6028.14 | 2615.04  | 2.31  | 0.00056401 |
| 93909_f_at  | Ccrn4l        | ENSMUSG CCR4 carbon catabolite repressor        | 271.86  | 1167.31  | -4.29 | 0.00056656 |
| 96605_at    | Tmem176a      | transmembrane protein 176A                      | 1591.85 | 266.88   | 5.96  | 0.00056704 |
| 102141_f_at | 4933434E20Rik | RIKEN cDNA 4933434E20 gene                      | 809.44  | 322.30   | 2.51  | 0.00057308 |
| 104316_at   | Gna13         | guanine nucleotide binding protein 13           | 329.87  | 135.54   | 2.43  | 0.00057332 |
| 98127_at    | Capza2        | capping protein (actin filament) related        | 4842.42 | 1561.97  | 3.10  | 0.0005766  |
| 160307_at   | Pi4k2a        | phosphatidylinositol 4-kinase type 2A           | 2269.39 | 909.04   | 2.50  | 0.00057673 |
| 92610_at    | Rdbp          | RD RNA-binding protein                          | 1263.78 | 429.51   | 2.94  | 0.00057682 |
| 98944_at    | LOC100048726  | SEC23B (S. cerevisiae) /// similar              | 2445.52 | 1125.01  | 2.17  | 0.00058014 |
| 95345_at    | Tpbp          | trophoblast glycoprotein                        | 112.85  | 243.12   | -2.15 | 0.00058023 |
| 103527_at   | Slc35e4       | solute carrier family 35, member 4              | 1767.42 | 651.51   | 2.71  | 0.00058045 |
| 104139_at   | P4ha1         | procollagen-proline, 2-oxoglutarate             | 759.67  | 260.35   | 2.92  | 0.00058055 |
| 98808_at    | Neurod2       | neurogenic differentiation 2                    | 786.69  | 1918.40  | -2.44 | 0.00058058 |
| 160929_at   | Mettl3        | methyltransferase-like 3                        | 323.42  | 157.19   | 2.06  | 0.00058075 |
| 104288_at   | Cul4a         | cullin 4A                                       | 1329.70 | 503.91   | 2.64  | 0.0005811  |
| 96719_i_at  | Pvalb         | parvalbumin                                     | 5201.35 | 16479.27 | -3.17 | 0.00058122 |
| 97737_f_at  | Nlr1          | NLR family member X1                            | 1186.19 | 282.42   | 4.20  | 0.00058279 |
| 103309_at   | Frap1         | FK506 binding protein 12-rapamycin              | 2124.94 | 557.67   | 3.81  | 0.00058499 |
| 100718_at   | EG625801      | LOC100048726 prothymosin alpha /// predicted    | 2526.11 | 5934.09  | -2.35 | 0.00058515 |
| 103738_at   | BC037034      | cDNA sequence BC037034                          | 4676.64 | 2190.58  | 2.13  | 0.00058528 |
| 93836_at    | Bnip3         | BCL2/adenovirus E1B interacting protein         | 1404.67 | 475.24   | 2.96  | 0.00058685 |
| 102320_at   | Snx12         | sorting nexin 12                                | 2187.34 | 599.02   | 3.65  | 0.00058823 |
| 101362_at   | Mapk9         | mitogen-activated protein kinase 9              | 196.05  | 416.39   | -2.12 | 0.0005884  |
| 98872_at    | Ugt8a         | UDP galactosyltransferase 8A                    | 41.44   | 154.55   | -3.73 | 0.0005893  |
| 97451_at    | Mcf2          | multiple coagulation factor deficiency          | 2306.61 | 480.27   | 4.80  | 0.00059348 |
| 102090_f_at | Smyd5         | SET and MYND domain containing protein          | 503.20  | 199.61   | 2.52  | 0.00059605 |
| 96252_at    | Pdcd6ip       | programmed cell death 6 interacting protein     | 1365.75 | 652.66   | 2.09  | 0.00059872 |
| 94312_at    | Pdxdc1        | pyridoxal-dependent decarboxylase 1             | 174.37  | 418.94   | -2.40 | 0.00059958 |
| 97829_at    | Cdipt         | CDP-diacylglycerol--inositol 3-phosphate        | 4083.81 | 2027.76  | 2.01  | 0.00060181 |
| 95508_at    | Nckap1        | NCK-associated protein 1                        | 8317.07 | 3667.28  | 2.27  | 0.00060286 |



|                |                      |                                        |         |         |        |            |
|----------------|----------------------|----------------------------------------|---------|---------|--------|------------|
| 94194_s_at     | Hcn2                 | hyperpolarization-activated, cycli     | 282.14  | 108.33  | 2.60   | 0.00060717 |
| AFFX-DapX-3_at | ---                  | ---                                    | 957.85  | 45.34   | 21.13  | 0.00061126 |
| 93411_at       | Sema7a               | sema domain, immunoglobulin d          | 76.46   | 250.12  | -3.27  | 0.00061186 |
| 160922_at      | Ogfod2               | 2-oxoglutarate and iron-depende        | 597.34  | 219.53  | 2.72   | 0.0006119  |
| 103414_at      | Skiv2l               | superkiller viralicidic activity 2-lik | 1021.74 | 462.91  | 2.21   | 0.00061694 |
| 102299_at      | Prkca                | protein kinase C, alpha                | 1148.64 | 356.88  | 3.22   | 0.00061915 |
| 103536_at      | Tmeff2               | transmembrane protein with EGF         | 1154.28 | 269.32  | 4.29   | 0.00061962 |
| 98121_at       | Fnta /// LOC1000469  | farnesyltransferase, CAAX box, al      | 1983.21 | 972.82  | 2.04   | 0.00062011 |
| 103584_at      | 5830471E12Rik        | RIKEN cDNA 5830471E12 gene             | 5636.64 | 1997.96 | 2.82   | 0.00062376 |
| 95939_i_at     | BC052328             | cDNA sequence BC052328                 | 487.79  | 237.55  | 2.05   | 0.00062568 |
| 94811_s_at     | Gtf2h1 /// Ndn       | general transcription factor II H, I   | 738.35  | 1935.73 | -2.62  | 0.0006273  |
| 96319_at       | Cdc20                | cell division cycle 20 homolog (S.     | 288.31  | 677.21  | -2.35  | 0.0006274  |
| 103619_at      | Cyb5b                | cytochrome b5 type B                   | 2573.76 | 833.78  | 3.09   | 0.00062857 |
| 102791_at      | Psmb8                | proteasome (prosome, macropai          | 300.48  | 142.10  | 2.11   | 0.00063268 |
| 96881_at       | Commd6               | COMM domain containing 6               | 392.28  | 1029.90 | -2.63  | 0.00064293 |
| 93272_at       | Stk16                | serine/threonine kinase 16             | 1335.82 | 467.32  | 2.86   | 0.00064368 |
| 95584_at       | Dppa2                | developmental pluripotency asso        | 435.08  | 87.12   | 4.99   | 0.00064375 |
| 93895_s_at     | Itpr1                | inositol 1,4,5-triphosphate recep      | 78.11   | 548.43  | -7.02  | 0.00064657 |
| 103829_at      | Herc2                | hect (homologous to the E6-AP (I       | 558.17  | 192.52  | 2.90   | 0.00064799 |
| 160970_at      | LOC100047199 /// Or  | outer dense fiber of sperm tails 2     | 371.93  | 160.48  | 2.32   | 0.00065001 |
| 98599_at       | Hdgfrp2              | hepatoma-derived growth factor         | 643.95  | 210.01  | 3.07   | 0.00065362 |
| 95680_at       | Ppp1r2               | protein phosphatase 1, regulator       | 1933.95 | 528.66  | 3.66   | 0.00065418 |
| 100156_at      | Mcm5                 | minichromosome maintenance d           | 378.45  | 1012.91 | -2.68  | 0.00065495 |
| 92939_at       | Gabra6               | gamma-aminobutyric acid (GABA          | 59.73   | 2284.11 | -38.24 | 0.00065588 |
| 102859_at      | Reep1                | receptor accessory protein 1           | 6201.62 | 1745.44 | 3.55   | 0.0006559  |
| 160223_at      | Ttc27                | tetratricopeptide repeat domain        | 255.31  | 86.54   | 2.95   | 0.00065692 |
| 160217_at      | 2310001A20Rik        | RIKEN cDNA 2310001A20 gene             | 603.27  | 263.21  | 2.29   | 0.00065875 |
| 104418_at      | Znrf2                | zinc and ring finger 2                 | 308.96  | 128.50  | 2.40   | 0.00065892 |
| 99458_i_at     | Mark2                | MAP/microtubule affinity-regulat       | 3750.46 | 1166.25 | 3.22   | 0.00065982 |
| 104304_r_at    | Polr3k               | polymerase (RNA) III (DNA direct       | 70.89   | 179.87  | -2.54  | 0.00066265 |
| 93896_at       | Ptprd                | protein tyrosine phosphatase, re       | 603.81  | 250.66  | 2.41   | 0.00066389 |
| 103762_at      | Gtf2f1               | general transcription factor IIF, p    | 2128.66 | 570.52  | 3.73   | 0.00066701 |
| 93527_at       | 2310051E17Rik /// Kl | Kruppel-like factor 9 /// RIKEN cC     | 94.24   | 281.54  | -2.99  | 0.00066745 |
| 160388_at      | Sc4mol               | sterol-C4-methyl oxidase-like          | 1813.68 | 492.27  | 3.68   | 0.00066761 |
| 93780_at       | Them2                | thioesterase superfamily membe         | 935.18  | 466.07  | 2.01   | 0.00066889 |
| 97297_at       | Pcp4l1               | Purkinje cell protein 4-like 1         | 4094.57 | 466.08  | 8.79   | 0.00067023 |
| 99457_at       | Mki67                | antigen identified by monoclonal       | 36.29   | 125.57  | -3.46  | 0.00067173 |
| 160138_at      | Mxi1                 | Max interacting protein 1              | 485.31  | 1160.09 | -2.39  | 0.00067476 |
| 96864_at       | Mrps26               | mitochondrial ribosomal protein        | 720.06  | 326.03  | 2.21   | 0.00067552 |
| 99666_at       | Cs                   | citrate synthase                       | 3679.55 | 1721.56 | 2.14   | 0.00068246 |
| 100886_f_at    | Mrpl45               | mitochondrial ribosomal protein        | 805.77  | 377.38  | 2.14   | 0.00068593 |
| 94516_f_at     | Penk1                | preproenkephalin 1                     | 279.93  | 815.50  | -2.91  | 0.00068697 |
| 94415_at       | Bach1                | BTB and CNC homology 1                 | 196.20  | 477.91  | -2.44  | 0.00068703 |
| 95144_at       | Arpc1a               | actin related protein 2/3 comple       | 2360.29 | 702.64  | 3.36   | 0.00069101 |
| 102332_at      | Ulk1                 | Unc-51 like kinase 1 (C. elegans)      | 1159.27 | 432.83  | 2.68   | 0.00069107 |
| 162095_f_at    | Gas7                 | growth arrest specific 7               | 115.11  | 324.01  | -2.81  | 0.00069116 |
| 160419_r_at    | Ubac2                | Ubiquitin associated domain con        | 248.00  | 66.28   | 3.74   | 0.00069119 |
| 96887_at       | Ndufb11              | NADH dehydrogenase (ubiquinor          | 1297.73 | 3464.03 | -2.67  | 0.00070151 |
| 98586_at       | Nap1l1               | nucleosome assembly protein 1-l        | 416.89  | 186.70  | 2.23   | 0.00070338 |
| 100733_at      | Psma2                | proteasome (prosome, macropai          | 1138.65 | 3013.29 | -2.65  | 0.00070494 |
| 94054_at       | Cttn                 | cortactin                              | 3039.93 | 1416.83 | 2.15   | 0.00070589 |
| 102696_s_at    | Pitpnb               | phosphatidylinositol transfer pro      | 30.39   | 103.25  | -3.40  | 0.00070855 |
| 102085_at      | Insm1                | insulinoma-associated 1                | 144.38  | 389.95  | -2.70  | 0.00070875 |
| 104425_at      | Inadl                | InaD-like (Drosophila)                 | 305.82  | 68.44   | 4.47   | 0.00070962 |
| 161133_at      | Calm2                | Calmodulin 2                           | 240.29  | 503.86  | -2.10  | 0.00071001 |

|             |                      |                                      |         |          |       |            |
|-------------|----------------------|--------------------------------------|---------|----------|-------|------------|
| 93539_at    | Anapc13              | anaphase promoting complex sul       | 299.85  | 716.85   | -2.39 | 0.00071469 |
| 101031_at   | Surf1                | surfeit gene 1                       | 1420.06 | 597.36   | 2.38  | 0.0007175  |
| 94002_at    | Cul1                 | cullin 1                             | 1874.13 | 868.75   | 2.16  | 0.00071754 |
| 96322_at    | Edf1                 | endothelial differentiation-relate   | 220.81  | 586.83   | -2.66 | 0.000719   |
| 101937_s_at | Clk4                 | CDC like kinase 4                    | 71.51   | 205.25   | -2.87 | 0.00072306 |
| 98154_at    | Gtf3c2 /// Mpv17     | Mpv17 transgene, kidney disease      | 736.70  | 269.64   | 2.73  | 0.00072709 |
| 104296_at   | Hnrp12               | heterogeneous nuclear ribonucle      | 127.77  | 304.63   | -2.38 | 0.00072763 |
| 100559_at   | Dhx16                | DEAH (Asp-Glu-Ala-His) box polyr     | 751.70  | 287.71   | 2.61  | 0.00073624 |
| 162166_f_at | Nrsn1                | neurensin 1                          | 2247.38 | 616.62   | 3.64  | 0.00073642 |
| 161358_r_at | Dpep3                | dipeptidase 3                        | 446.13  | 929.95   | -2.08 | 0.00073666 |
| 97102_at    | Yme1l1               | YME1-like 1 (S. cerevisiae)          | 554.99  | 126.50   | 4.39  | 0.00073894 |
| 96191_at    | Arfggef1             | ADP-ribosylation factor guanine r    | 2686.18 | 1102.87  | 2.44  | 0.0007397  |
| 98461_at    | Klc4                 | kinesin light chain 4                | 1261.17 | 549.58   | 2.29  | 0.00074271 |
| 101787_f_at | 2700079J08Rik /// Cc | CCR4 carbon catabolite repressio     | 3611.82 | 1324.71  | 2.73  | 0.00074365 |
| 98491_at    | Arl8b                | ADP-ribosylation factor-like 8B      | 48.37   | 187.21   | -3.87 | 0.0007458  |
| 93058_at    | Eif1a                | eukaryotic translation initiation f. | 893.04  | 275.62   | 3.24  | 0.00074856 |
| 98594_at    | 1190002N15Rik        | RIKEN cDNA 1190002N15 gene           | 305.65  | 725.51   | -2.37 | 0.0007493  |
| 102296_at   | Pcsk2                | proprotein convertase subtilisin/    | 1602.81 | 499.57   | 3.21  | 0.00075034 |
| 101946_at   | Lypla1               | lysophospholipase 1                  | 40.15   | 183.75   | -4.58 | 0.0007524  |
| 96011_at    | Matr3                | matrin 3                             | 57.20   | 530.72   | -9.28 | 0.00075698 |
| 100458_at   | Napb                 | N-ethylmaleimide sensitive fusioi    | 2729.68 | 447.28   | 6.10  | 0.0007616  |
| 103442_at   | Dhrs7b /// LOC10004  | dehydrogenase/reductase (SDR f       | 2114.28 | 742.46   | 2.85  | 0.00076168 |
| 93867_at    | Abcd4                | ATP-binding cassette, sub-family     | 343.04  | 104.76   | 3.27  | 0.00076454 |
| 93421_at    | Pftk1                | PFTAIRE protein kinase 1             | 3029.15 | 558.04   | 5.43  | 0.00076555 |
| 161757_f_at | lpo5 /// LOC1000443  | importin 5 /// hypothetical prote    | 742.07  | 342.47   | 2.17  | 0.00076745 |
| 102122_f_at | ---                  | ---                                  | 891.04  | 298.62   | 2.98  | 0.00076756 |
| 160098_s_at | Faf1                 | Fas-associated factor 1              | 165.00  | 349.96   | -2.12 | 0.00076777 |
| 95002_at    | D17Wsu92e            | DNA segment, Chr 17, Wayne Sta       | 2845.41 | 969.54   | 2.93  | 0.00076808 |
| 160296_at   | Wsb2                 | WD repeat and SOCS box-contair       | 2306.06 | 1093.73  | 2.11  | 0.00077021 |
| 97411_at    | Ect2                 | ect2 oncogene                        | 50.20   | 125.26   | -2.50 | 0.00077146 |
| 162430_at   | Tor1b                | torsin family 1, member B            | 172.82  | 71.72    | 2.41  | 0.0007749  |
| 95156_g_at  | Znrf1                | zinc and ring finger 1               | 420.58  | 202.64   | 2.08  | 0.00077613 |
| 95940_f_at  | BC052328             | cDNA sequence BC052328               | 246.29  | 61.48    | 4.01  | 0.00078035 |
| 94079_at    |                      | 4-Sep septin 4                       | 1037.15 | 2871.45  | -2.77 | 0.00078474 |
| 93456_r_at  | Bmp4                 | bone morphogenetic protein 4         | 24.60   | 59.79    | -2.43 | 0.0007879  |
| 95431_at    | Tomm70a              | translocase of outer mitochondri     | 83.88   | 172.32   | -2.05 | 0.0007896  |
| 93070_at    | lpo5                 | importin 5                           | 1897.42 | 496.53   | 3.82  | 0.00079047 |
| 96680_at    | Dnajb9               | DnaJ (Hsp40) homolog, subfamily      | 182.02  | 368.90   | -2.03 | 0.00079319 |
| 92892_at    | Nrsn1                | neurensin 1                          | 1967.85 | 322.53   | 6.10  | 0.00079343 |
| 100579_s_at | Clta                 | clathrin, light polypeptide (Lca)    | 1081.43 | 509.58   | 2.12  | 0.00079574 |
| 95520_at    | Tmbim1               | transmembrane BAX inhibitor mc       | 498.67  | 222.11   | 2.25  | 0.00079592 |
| 97285_f_at  | Ubx1                 | UBX domain containing 1              | 1087.58 | 290.98   | 3.74  | 0.00079603 |
| 98470_at    | Slc25a14             | solute carrier family 25 (mitochoi   | 532.70  | 215.66   | 2.47  | 0.00079611 |
| 96831_at    | Pdia5                | protein disulfide isomerase assoc    | 357.66  | 159.00   | 2.25  | 0.00079675 |
| 94241_at    | Coasy                | Coenzyme A synthase                  | 425.34  | 132.05   | 3.22  | 0.00079734 |
| 102348_at   | BC003993 /// LOC100  | cDNA sequence BC003993 /// hy        | 761.12  | 210.29   | 3.62  | 0.00079736 |
| 161013_f_at | Spsb1                | splA/ryanodine receptor domain       | 910.31  | 279.34   | 3.26  | 0.00079788 |
| 96019_at    | Sypl                 | synaptophysin-like protein           | 1473.58 | 507.60   | 2.90  | 0.0007984  |
| 104313_at   | Pgm1 /// Pgm2        | phosphoglucomutase 1 /// phos        | 7054.04 | 1851.51  | 3.81  | 0.00080012 |
| 95470_at    | Pak1ip1              | PAK1 interacting protein 1           | 1132.17 | 256.54   | 4.41  | 0.00080136 |
| 101104_at   | Dscr3                | Down syndrome critical region ge     | 1456.57 | 678.01   | 2.15  | 0.00080375 |
| 93126_at    | Ckb                  | creatine kinase, brain               | 4733.59 | 11629.86 | -2.46 | 0.00080377 |
| 95405_at    | Mesdc2               | mesoderm development candida         | 1459.43 | 477.12   | 3.06  | 0.00081032 |
| 102941_at   | LOC100044322 /// U   | UDP-glucose ceramide glucosyltr      | 655.77  | 294.17   | 2.23  | 0.0008109  |
| 98128_at    | Atp5j /// LOC654426  | ATP synthase, H+ transporting, m     | 1428.48 | 3257.13  | -2.28 | 0.00081096 |

|             |                     |                                     |         |         |       |            |
|-------------|---------------------|-------------------------------------|---------|---------|-------|------------|
| 94840_at    | Hexa                | hexosaminidase A                    | 633.15  | 238.54  | 2.65  | 0.00081155 |
| 160230_at   | Cox17               | cytochrome c oxidase, subunit XI    | 1754.76 | 770.29  | 2.28  | 0.00081176 |
| 160948_at   | Ppp3cc              | protein phosphatase 3, catalytic s  | 678.06  | 154.50  | 4.39  | 0.00081198 |
| 93573_at    | Mt1                 | metallothionein 1                   | 399.47  | 1819.23 | -4.55 | 0.00081509 |
| 100514_at   | Gna13               | guanine nucleotide binding prote    | 650.48  | 178.25  | 3.65  | 0.00081556 |
| 96086_at    | 1110031B06Rik       | RIKEN cDNA 1110031B06 gene          | 3336.06 | 1600.95 | 2.08  | 0.00081585 |
| 93735_f_at  | Psmc3               | proteasome (prosome, macropai       | 3101.36 | 1255.92 | 2.47  | 0.00081844 |
| 93953_at    | Prss12              | protease, serine, 12 neurotrypsin   | 1058.61 | 302.77  | 3.50  | 0.0008187  |
| 97460_at    | Ube2r2              | ubiquitin-conjugating enzyme E2     | 5125.99 | 1892.47 | 2.71  | 0.00081886 |
| 101492_at   | Pin1                | protein (peptidyl-prolyl cis/trans  | 147.82  | 334.22  | -2.26 | 0.00082052 |
| 95444_at    | Tmem49              | transmembrane protein 49            | 2673.79 | 1261.33 | 2.12  | 0.0008206  |
| 97989_at    | Ppp3cb              | protein phosphatase 3, catalytic s  | 138.05  | 359.78  | -2.61 | 0.00082115 |
| 93810_at    | Ctsd                | cathepsin D                         | 6011.35 | 2249.09 | 2.67  | 0.00082176 |
| 100079_at   | Ndufb9              | NADH dehydrogenase (ubiquinor       | 533.62  | 1352.08 | -2.53 | 0.00082215 |
| 100026_at   | Bcat1               | branched chain aminotransferase     | 3221.95 | 1254.86 | 2.57  | 0.00082304 |
| 98070_at    | Suds3               | suppressor of defective silencing   | 2945.40 | 1314.92 | 2.24  | 0.00082425 |
| 97958_at    | Prkcbp1             | protein kinase C binding protein :  | 417.68  | 197.14  | 2.12  | 0.00082529 |
| 160228_at   | Cldnd1              | claudin domain containing 1         | 180.92  | 380.01  | -2.10 | 0.00083053 |
| 95149_at    | Copz1               | coatomer protein complex, subu      | 963.34  | 2011.15 | -2.09 | 0.00083166 |
| 96920_at    | Htra1               | HtrA serine peptidase 1             | 3446.53 | 1337.97 | 2.58  | 0.00084824 |
| 100284_at   | Zic4                | zinc finger protein of the cerebell | 60.32   | 165.38  | -2.74 | 0.00085546 |
| 100086_at   | Lrpap1              | low density lipoprotein receptor-   | 3234.91 | 1602.97 | 2.02  | 0.00085981 |
| 96529_at    | Ap1gbp1             | AP1 gamma subunit binding prot      | 588.51  | 182.84  | 3.22  | 0.0008719  |
| 94024_at    | Cdt1                | chromatin licensing and DNA rep     | 349.93  | 703.10  | -2.01 | 0.0008729  |
| 93499_at    | Capza1              | capping protein (actin filament) r  | 3251.66 | 1033.24 | 3.15  | 0.0008804  |
| 99930_s_at  | Psen2               | presenilin 2                        | 2023.69 | 247.83  | 8.17  | 0.00088051 |
| 98136_at    | LOC671878 /// Sms   | spermine synthase /// similar to :  | 273.93  | 618.75  | -2.26 | 0.00088178 |
| 93954_at    | Gucy1b3             | guanylate cyclase 1, soluble, beta  | 39.44   | 371.35  | -9.42 | 0.00088197 |
| 103015_at   | Bcl6                | B-cell leukemia/lymphoma 6          | 343.52  | 129.87  | 2.65  | 0.00088391 |
| 104460_at   | Cacna1g             | calcium channel, voltage-depend     | 104.11  | 346.95  | -3.33 | 0.0008856  |
| 103716_at   | Cep350              | centrosomal protein 350             | 1640.56 | 662.72  | 2.48  | 0.00089545 |
| 92934_at    | Zfp90               | zinc finger protein 90              | 673.52  | 183.68  | 3.67  | 0.00089582 |
| 160482_at   | Acaa1a /// Acaa1b   | acetyl-Coenzyme A acyltransfera:    | 2154.90 | 863.81  | 2.49  | 0.00089615 |
| 102062_at   | Smarcc1             | SWI/SNF related, matrix associat    | 2731.97 | 419.37  | 6.51  | 0.00089626 |
| 103423_at   | Cyb561              | cytochrome b-561                    | 3268.89 | 1327.21 | 2.46  | 0.00089943 |
| 102060_at   | Golga4              | golgi autoantigen, golgin subfami   | 1377.30 | 415.71  | 3.31  | 0.00090384 |
| 160185_at   | Tagln3              | transgelin 3                        | 2961.55 | 1477.38 | 2.00  | 0.00090881 |
| 92220_s_at  | Bin1                | bridging integrator 1               | 306.16  | 639.39  | -2.09 | 0.00091107 |
| 96674_at    | Tnpo3               | transportin 3                       | 1716.43 | 536.71  | 3.20  | 0.00091664 |
| 98999_at    | Adsl                | adenylosuccinate lyase              | 1119.99 | 335.99  | 3.33  | 0.00091815 |
| 92558_at    | Vcam1               | vascular cell adhesion molecule 1   | 123.41  | 275.07  | -2.23 | 0.00092078 |
| 160391_at   | Fads1               | fatty acid desaturase 1             | 2185.10 | 1087.96 | 2.01  | 0.0009229  |
| 93754_at    | Ech1                | enoyl coenzyme A hydratase 1, p     | 2407.88 | 794.82  | 3.03  | 0.00093005 |
| 160581_at   | Atg16l1             | autophagy-related 16-like 1 (yeas   | 1201.45 | 542.39  | 2.22  | 0.00093086 |
| 96526_at    | D030029J20Rik       | RIKEN cDNA D030029J20 gene          | 883.02  | 285.69  | 3.09  | 0.00093257 |
| 92574_at    | Sdhb                | succinate dehydrogenase comple      | 841.00  | 1964.71 | -2.34 | 0.00093374 |
| 161895_s_at | Wdr81               | WD repeat domain 81                 | 4459.67 | 1980.96 | 2.25  | 0.00093896 |
| 93046_at    | Nup50               | nucleoporin 50                      | 1902.00 | 476.51  | 3.99  | 0.00094501 |
| 160137_at   | B3gnt2              | UDP-GlcNAc:betaGal beta-1,3-N-      | 1328.12 | 339.22  | 3.92  | 0.00094573 |
| 98509_at    | BC002199            | cDNA sequence BC002199              | 4681.11 | 1435.07 | 3.26  | 0.00094706 |
| 97200_f_at  | Snrpe               | small nuclear ribonucleoprotein f   | 967.58  | 2059.70 | -2.13 | 0.00094739 |
| 92648_at    | Stxbp3a             | syntaxin binding protein 3A         | 70.22   | 219.32  | -3.12 | 0.00094753 |
| 98635_at    | Ube2z               | ubiquitin-conjugating enzyme E2:    | 1659.18 | 614.80  | 2.70  | 0.00095676 |
| 160225_at   | Gtf2b               | general transcription factor IIB    | 2712.26 | 1076.24 | 2.52  | 0.00096866 |
| 96766_s_at  | LOC100048488 /// Ty | TYRO3 protein tyrosine kinase 3 /   | 1129.56 | 519.10  | 2.18  | 0.00097027 |

|             |                       |                                      |         |         |        |            |
|-------------|-----------------------|--------------------------------------|---------|---------|--------|------------|
| 160435_at   | Cd99l2                | Cd99 antigen-like 2                  | 2389.41 | 758.65  | 3.15   | 0.00097608 |
| 95112_f_at  | Ppil2                 | peptidylprolyl isomerase (cycloph    | 686.08  | 316.69  | 2.17   | 0.00097757 |
| 101476_at   | Pabpn1                | poly(A) binding protein, nuclear 1   | 698.38  | 1579.54 | -2.26  | 0.00097772 |
| 104163_at   | Ipo8                  | importin 8                           | 2172.24 | 655.23  | 3.32   | 0.00098452 |
| 94756_at    | Hist1h3a /// Hist1h3t | histone cluster 2, H3c1 /// histon   | 354.24  | 88.14   | 4.02   | 0.0009856  |
| 98917_at    | Hiat1                 | hippocampus abundant transcrip       | 89.60   | 326.91  | -3.65  | 0.0009862  |
| 101419_at   | Tubb4                 | tubulin, beta 4                      | 1174.85 | 2952.33 | -2.51  | 0.00098669 |
| 161942_f_at | Cwf19l1               | CWF19-like 1, cell cycle control (S  | 304.81  | 117.46  | 2.60   | 0.00098695 |
| 93753_at    | Litaf                 | LPS-induced TN factor                | 876.58  | 308.37  | 2.84   | 0.00098988 |
| 99925_f_at  | LOC100045019 /// Tu   | tubulin, gamma 2 /// similar to Ti   | 772.43  | 307.56  | 2.51   | 0.00099358 |
| 94391_at    | Gjb6                  | gap junction protein, beta 6         | 39.51   | 157.98  | -4.00  | 0.00099398 |
| 103845_at   | Slc31a1               | solute carrier family 31, member     | 1698.30 | 469.13  | 3.62   | 0.00099415 |
| 99076_at    | Nr1d2                 | nuclear receptor subfamily 1, gro    | 55.55   | 262.84  | -4.73  | 0.00099575 |
| 92256_at    | Ctsb                  | cathepsin B                          | 1314.78 | 252.28  | 5.21   | 0.00099865 |
| 97199_at    | Cpne1 /// Rbm12       | RNA binding motif protein 12 ///     | 1303.97 | 618.14  | 2.11   | 0.0010023  |
| 92649_at    | D0HXS9928E            | DNA segment, human DXS9928E          | 1152.63 | 470.29  | 2.45   | 0.00101028 |
| 103466_at   | Cyhr1                 | cysteine and histidine rich 1        | 797.68  | 318.43  | 2.51   | 0.00101433 |
| 92535_at    | Ebf1                  | early B-cell factor 1                | 845.10  | 303.38  | 2.79   | 0.00101439 |
| 104274_at   | Cpne3                 | copine III                           | 4674.02 | 767.80  | 6.09   | 0.00101853 |
| 103699_i_at | Frat2                 | frequently rearranged in advance     | 1174.80 | 361.67  | 3.25   | 0.00101965 |
| 93089_at    | Eif4a2                | eukaryotic translation initiation f  | 2227.00 | 4604.34 | -2.07  | 0.00101983 |
| 161270_i_at | Wnk1                  | WNK lysine deficient protein kina    | 1052.88 | 29.02   | 36.29  | 0.00102346 |
| 160785_at   | Arhgap21              | Rho GTPase activating protein 21     | 353.51  | 825.62  | -2.34  | 0.00102853 |
| 94818_at    | Ogt                   | O-linked N-acetylglucosamine (Gl     | 1343.76 | 607.44  | 2.21   | 0.00103038 |
| 161525_f_at | Rom1                  | rod outer segment membrane pr        | 102.04  | 37.65   | 2.71   | 0.00103076 |
| 104029_at   | Clgn                  | calmegin                             | 759.10  | 214.40  | 3.54   | 0.00103106 |
| 102892_at   | Kcnab2                | potassium voltage-gated channel      | 921.66  | 154.07  | 5.98   | 0.00103116 |
| 92722_f_at  | Six1                  | sine oculis-related homeobox 1 h     | 743.83  | 134.33  | 5.54   | 0.00103581 |
| 102114_f_at | Angptl4               | angiopoietin-like 4                  | 910.40  | 390.25  | 2.33   | 0.00103591 |
| 92710_at    | Rgnef                 | Rho-guanine nucleotide exchang       | 950.26  | 371.49  | 2.56   | 0.00103929 |
| 94288_at    | Hist1h1c              | histone cluster 1, H1c               | 2012.76 | 718.03  | 2.80   | 0.00104107 |
| 104213_at   | Upp2                  | uridine phosphorylase 2              | 1027.02 | 369.87  | 2.78   | 0.00104678 |
| 103222_at   | Eps8 /// LOC632638    | epidermal growth factor recepto      | 31.87   | 238.33  | -7.48  | 0.0010469  |
| 95028_r_at  | LOC668030 /// RP23-   | novel KRAB box and zinc finger, C    | 1207.93 | 394.28  | 3.06   | 0.00105284 |
| 98013_at    | D15Ert621e            | DNA segment, Chr 15, ERATO Doi       | 648.64  | 165.09  | 3.93   | 0.00105778 |
| 102196_at   | Gna11                 | guanine nucleotide binding prote     | 1919.82 | 829.08  | 2.32   | 0.00105936 |
| 94812_at    | Gtf2h1                | general transcription factor II H, f | 1597.27 | 653.83  | 2.44   | 0.00106204 |
| 160113_at   | Brap                  | BRCA1 associated protein             | 1372.47 | 680.61  | 2.02   | 0.00107794 |
| 103556_at   | Angptl2               | angiopoietin-like 2                  | 1741.14 | 846.17  | 2.06   | 0.00107836 |
| 160801_at   | Pqlc1                 | PQ loop repeat containing 1          | 4735.93 | 1189.81 | 3.98   | 0.00108565 |
| 99169_at    | Carm1                 | coactivator-associated arginine r    | 1307.97 | 588.90  | 2.22   | 0.00108655 |
| 104183_at   | Tubgcp4               | tubulin, gamma complex associat      | 996.57  | 406.59  | 2.45   | 0.00108757 |
| 96017_at    | 0610006I08Rik         | RIKEN cDNA 0610006I08 gene           | 1454.03 | 3503.96 | -2.41  | 0.00109141 |
| 103933_at   | Siae                  | sialic acid acetylerase              | 273.91  | 126.33  | 2.17   | 0.0010959  |
| 98508_s_at  | Ppap2a                | phosphatidic acid phosphatase 2i     | 894.65  | 201.85  | 4.43   | 0.00109776 |
| 93045_at    | Abcd3                 | ATP-binding cassette, sub-family     | 3304.98 | 571.43  | 5.78   | 0.00109819 |
| 94010_g_at  | LOC100045866 /// Tc   | transcription elongation factor B    | 284.34  | 608.75  | -2.14  | 0.00109976 |
| 96591_at    | Reln                  | reelin                               | 140.26  | 2218.52 | -15.82 | 0.0010998  |
| 93040_at    | Fxyd1                 | FXYP domain-containing ion tran      | 646.41  | 1576.14 | -2.44  | 0.0011003  |
| 102864_at   | Hoxa7                 | homeo box A7                         | 701.13  | 304.21  | 2.30   | 0.00110282 |
| 104119_at   | 2610024E20Rik         | RIKEN cDNA 2610024E20 gene           | 1971.37 | 524.66  | 3.76   | 0.00110744 |
| 97506_at    | Rnf2                  | ring finger protein 2                | 157.97  | 387.29  | -2.45  | 0.00112266 |
| 95559_at    | 6330403K07Rik         | RIKEN cDNA 6330403K07 gene           | 5657.74 | 1030.74 | 5.49   | 0.00112273 |
| 160633_at   | Thoc4                 | THO complex 4                        | 324.02  | 677.98  | -2.09  | 0.00112985 |
| 97211_at    | Armcx2                | armadillo repeat containing, X-lin   | 2964.68 | 656.75  | 4.51   | 0.00113023 |

|             |               |                                     |         |         |        |            |
|-------------|---------------|-------------------------------------|---------|---------|--------|------------|
| 99096_at    | Ddx24         | DEAD (Asp-Glu-Ala-Asp) box poly     | 1662.25 | 376.68  | 4.41   | 0.00113273 |
| 104556_at   | 4933426K21Rik | RIKEN cDNA 4933426K21 gene          | 70.80   | 188.97  | -2.67  | 0.00114665 |
| 161085_r_at | A4galt        | alpha 1,4-galactosyltransferase     | 915.05  | 441.04  | 2.07   | 0.00115408 |
| 160620_at   | Gt(ROSA)26Sor | gene trap ROSA 26, Philippe Soris   | 37.63   | 95.16   | -2.53  | 0.00115415 |
| 92350_at    | Mapre1        | microtubule-associated protein, I   | 1761.66 | 468.58  | 3.76   | 0.00115696 |
| 99339_r_at  | Kcnd2         | potassium voltage-gated channel     | 30.86   | 665.33  | -21.56 | 0.00115983 |
| 160546_at   | Aldoc         | aldolase 3, C isoform               | 1292.50 | 5293.63 | -4.10  | 0.00116847 |
| 103567_at   | Fryl          | furry homolog-like (Drosophila)     | 1643.21 | 532.02  | 3.09   | 0.00117749 |
| 96733_at    | Rap1gds1      | RAP1, GTP-GDP dissociation stim     | 5693.20 | 1723.71 | 3.30   | 0.00119128 |
| 160103_at   | 7-Mar         | membrane-associated ring finger     | 339.26  | 1135.38 | -3.35  | 0.00119246 |
| 100068_at   | Aldh1a1       | aldehyde dehydrogenase family 1     | 285.19  | 848.11  | -2.97  | 0.00119355 |
| 95618_at    | Rab11fip5     | RAB11 family interacting protein    | 1018.46 | 316.79  | 3.21   | 0.00119461 |
| 94347_i_at  | Pcmt1         | protein-L-isoaspartate (D-asparta   | 1263.75 | 151.94  | 8.32   | 0.00120699 |
| 100742_at   | AA409749      | expressed sequence AA409749         | 378.70  | 184.78  | 2.05   | 0.00120862 |
| 98811_at    | Ptgir         | prostaglandin I receptor (IP)       | 1083.16 | 99.16   | 10.92  | 0.0012091  |
| 95045_at    | Mettl9        | methyltransferase like 9            | 428.72  | 1020.29 | -2.38  | 0.0012099  |
| 162220_r_at | Dnajb13       | DnaJ (Hsp40) related, subfamily E   | 445.57  | 199.32  | 2.24   | 0.00121109 |
| 104766_at   | Nola1         | nucleolar protein family A, memt    | 2800.19 | 1275.52 | 2.20   | 0.00121127 |
| 103578_at   | EG545878      | target of myb1 homolog (chicken     | 789.95  | 330.50  | 2.39   | 0.0012131  |
| 98938_at    | Rnaseh2c      | ribonuclease H2, subunit C          | 218.22  | 554.18  | -2.54  | 0.00121408 |
| 160981_at   | Atxn10        | ataxin 10                           | 1064.79 | 362.68  | 2.94   | 0.00121925 |
| 160386_at   | Clptm1l       | CLPTM1-like                         | 2056.57 | 1012.14 | 2.03   | 0.00122031 |
| 102860_at   | Serpina3g     | serine (or cysteine) peptidase inh  | 2358.64 | 747.77  | 3.15   | 0.00122817 |
| 94143_at    | Gfap          | glial fibrillary acidic protein     | 125.04  | 263.71  | -2.11  | 0.00122848 |
| 97756_s_at  | LOC100046214  | protocadherin alpha 4               | 2179.82 | 148.11  | 14.72  | 0.00122866 |
| 160795_at   | Scamp1        | secretory carrier membrane prot     | 1165.02 | 548.24  | 2.13   | 0.00123022 |
| 101582_at   | Gnl2          | guanine nucleotide binding prote    | 683.00  | 333.84  | 2.05   | 0.00123252 |
| 103494_at   | Tspan8        | tetraspanin 8                       | 687.62  | 202.47  | 3.40   | 0.00124381 |
| 96205_at    | Sh3bgr        | SH3-binding domain glutamic aci     | 681.39  | 263.52  | 2.59   | 0.00124528 |
| 104529_at   | Cam1          | calcium modulating ligand           | 1246.38 | 581.29  | 2.14   | 0.00125007 |
| 104716_at   | LOC100045055  | retinol binding protein 1, cellular | 94.86   | 277.78  | -2.93  | 0.00125177 |
| 160261_i_at | Lats2         | large tumor suppressor 2            | 2139.00 | 847.53  | 2.52   | 0.00125817 |
| 97833_at    | Pfkip         | phosphofructokinase, platelet       | 1788.78 | 292.84  | 6.11   | 0.00126202 |
| 95062_at    | Cast          | calpastatin                         | 1269.17 | 129.08  | 9.83   | 0.00126914 |
| 97947_at    | Adam10        | a disintegrin and metallopeptidas   | 272.14  | 769.92  | -2.83  | 0.00126921 |
| 160727_at   | 2410002F23Rik | RIKEN cDNA 2410002F23 gene          | 504.54  | 1189.99 | -2.36  | 0.00126966 |
| 102232_at   | Slc39a9       | solute carrier family 39 (zinc tran | 594.05  | 280.67  | 2.12   | 0.00127064 |
| 162362_f_at | Tnc           | tenascin C                          | 36.94   | 108.36  | -2.93  | 0.00129586 |
| 102885_at   | Vamp7         | vesicle-associated membrane prc     | 39.61   | 113.39  | -2.86  | 0.00129666 |
| 161396_f_at | Ube2o         | ubiquitin-conjugating enzyme E2     | 1759.66 | 338.24  | 5.20   | 0.00129949 |
| 160829_at   | Phlda1        | pleckstrin homology-like domain,    | 70.74   | 183.58  | -2.60  | 0.00130741 |
| 95658_at    | Commd1        | COMM domain containing 1            | 379.96  | 153.96  | 2.47   | 0.00131282 |
| 161756_at   | Rnmt1         | RNA methyltransferase like 1        | 464.06  | 222.95  | 2.08   | 0.00131288 |
| 95927_f_at  | 2610201A13Rik | RIKEN cDNA 2610201A13 gene          | 1452.94 | 318.39  | 4.56   | 0.00131856 |
| 100475_at   | Trim25        | tripartite motif-containing 25      | 424.45  | 109.44  | 3.88   | 0.00132207 |
| 100138_f_at | Rbm14         | RNA binding motif protein 14        | 1159.39 | 572.38  | 2.03   | 0.00132409 |
| 102747_at   | Tcte1         | t-complex-associated testis expre   | 194.94  | 421.70  | -2.16  | 0.00133388 |
| 95289_r_at  | Ccdc88a       | coiled coil domain containing 88    | 29.82   | 60.37   | -2.02  | 0.00133422 |
| 94731_at    | Stac          | src homology three (SH3) and cys    | 1598.92 | 239.48  | 6.68   | 0.00134396 |
| 101064_at   | Plrg1         | pleiotropic regulator 1, PRL1 hor   | 1869.49 | 756.01  | 2.47   | 0.00135114 |
| 103726_at   | Yipf5         | Yip1 domain family, member 5        | 141.73  | 336.09  | -2.37  | 0.00135724 |
| 94071_at    | Gosr2         | golgi SNAP receptor complex mei     | 1615.82 | 696.77  | 2.32   | 0.00135742 |
| 92185_at    | Arl4c         | ADP-ribosylation factor-like 4C     | 1765.11 | 429.50  | 4.11   | 0.0013603  |
| 104215_at   | Atf6          | activating transcription factor 6   | 308.50  | 90.37   | 3.41   | 0.00138163 |
| 160755_at   | Kif2c         | kinesin family member 2C            | 72.08   | 151.83  | -2.11  | 0.00138592 |



|             |               |                                                    |         |         |       |            |
|-------------|---------------|----------------------------------------------------|---------|---------|-------|------------|
| 94522_at    | Dctn3         | dynactin 3                                         | 1080.36 | 2386.15 | -2.21 | 0.00138921 |
| 102384_at   | Smarca2       | SWI/SNF related, matrix associat                   | 1449.82 | 456.35  | 3.18  | 0.00140944 |
| 97509_f_at  | Fgfr1         | fibroblast growth factor receptor                  | 1599.50 | 338.70  | 4.72  | 0.00141456 |
| 95690_at    | Samm50        | sorting and assembly machinery                     | 2215.69 | 839.92  | 2.64  | 0.0014161  |
| 103483_at   | Ercc5         | excision repair cross-complemen                    | 387.67  | 178.88  | 2.17  | 0.00141713 |
| 95601_at    | Ubqln1        | ubiquilin 1                                        | 303.57  | 773.73  | -2.55 | 0.00141974 |
| 95022_at    | Akap12        | A kinase (PRKA) anchor protein (ε                  | 1180.52 | 308.02  | 3.83  | 0.00142037 |
| 98881_at    | Hdhd2         | haloacid dehalogenase-like hydrc                   | 1291.67 | 635.33  | 2.03  | 0.00142141 |
| 95066_at    | Taldo1        | transaldolase 1                                    | 2802.09 | 1118.96 | 2.50  | 0.00143285 |
| 102002_at   | Ubqln2        | ubiquilin 2                                        | 87.29   | 390.07  | -4.47 | 0.00143295 |
| 96166_at    | Tex261        | testis expressed gene 261                          | 2538.94 | 1006.84 | 2.52  | 0.0014355  |
| 93116_at    | Prkacb        | protein kinase, cAMP dependent                     | 5114.94 | 1849.29 | 2.77  | 0.00144376 |
| 92644_s_at  | Myb           | myeloblastosis oncogene                            | 28.34   | 94.41   | -3.33 | 0.00146514 |
| 160697_at   | C77080        | expressed sequence C77080                          | 1940.91 | 905.04  | 2.14  | 0.00148853 |
| 99566_at    | Tpi1          | triosephosphate isomerase 1                        | 2059.37 | 5236.79 | -2.54 | 0.00148921 |
| 98333_at    | LOC100039740  | /// LC ribosomal protein S18 /// predict           | 1639.78 | 3860.06 | -2.35 | 0.00150074 |
| 162094_f_at | ---           | ---                                                | 960.98  | 281.57  | 3.41  | 0.0015018  |
| 104243_r_at | 6530401N04Rik | /// LI RIKEN cDNA 6530401N04 gene //               | 290.60  | 138.49  | 2.10  | 0.0015097  |
| 96013_r_at  | Matr3         | matrin 3                                           | 34.12   | 187.60  | -5.50 | 0.00151685 |
| 98424_at    | Ptpn13        | protein tyrosine phosphatase, no                   | 826.20  | 308.29  | 2.68  | 0.00151823 |
| 102019_at   | Mrpl13        | mitochondrial ribosomal protein                    | 317.79  | 777.89  | -2.45 | 0.00152077 |
| 93859_at    | Mtif2         | mitochondrial translational initia                 | 535.97  | 181.58  | 2.95  | 0.00153548 |
| 96785_at    | Kank3         | KN motif and ankyrin repeat dom                    | 474.76  | 219.07  | 2.17  | 0.00153562 |
| 99580_s_at  | LOC632297     | /// Ugt1a UDP glucuronosyltransferase 1 fa         | 1954.60 | 889.98  | 2.20  | 0.00154456 |
| 104067_at   | Tubgcp3       | tubulin, gamma complex associat                    | 628.43  | 292.76  | 2.15  | 0.00154688 |
| 160762_at   | Abr           | active BCR-related gene                            | 1553.23 | 531.07  | 2.92  | 0.00154817 |
| 160685_at   | Klhl7         | Kelch-like 7 (Drosophila)                          | 156.94  | 317.92  | -2.03 | 0.00155084 |
| 96211_at    | Dpp8          | dipeptidylpeptidase 8                              | 1283.55 | 464.10  | 2.77  | 0.00156747 |
| 93564_at    | Yars          | tyrosyl-tRNA synthetase                            | 1583.64 | 625.72  | 2.53  | 0.00156892 |
| 161193_r_at | ---           | ---                                                | 261.42  | 128.37  | 2.04  | 0.00157413 |
| 101998_at   | 4833420G17Rik | RIKEN cDNA 4833420G17 gene                         | 263.59  | 100.72  | 2.62  | 0.00160069 |
| 93831_at    | Nono          | non-POU-domain-containing, oct                     | 32.80   | 151.47  | -4.62 | 0.00160243 |
| 95355_at    | Agtrap        | angiotensin II, type I receptor-ass                | 663.38  | 251.37  | 2.64  | 0.00160931 |
| 93191_at    | Vamp4         | vesicle-associated membrane prc                    | 1879.02 | 583.56  | 3.22  | 0.00162067 |
| 100371_at   | Hnrnpa1       | heterogeneous nuclear ribonucle                    | 35.95   | 75.61   | -2.10 | 0.00162382 |
| 104294_at   | Ibtk          | inhibitor of Bruton agammaglobu                    | 432.23  | 163.58  | 2.64  | 0.00162636 |
| 104610_at   | Pprc1         | peroxisome proliferative activate                  | 169.08  | 65.71   | 2.57  | 0.00162835 |
| 160237_at   | Ndufa6        | NADH dehydrogenase (ubiquinor                      | 227.51  | 641.89  | -2.82 | 0.00163126 |
| 104407_at   | Alcam         | activated leukocyte cell adhesion                  | 1243.62 | 119.87  | 10.37 | 0.00163348 |
| 104106_at   | Sbno1         | sno, strawberry notch homolog 1                    | 503.10  | 72.21   | 6.97  | 0.00165565 |
| 160550_i_at | Magoh         | mago-nashi homolog, proliferatic                   | 192.99  | 582.79  | -3.02 | 0.00166269 |
| 99833_at    | Capn9         | /// LOC639715 calpain 9 (nCL-4) /// similar to cal | 649.56  | 283.12  | 2.29  | 0.00166612 |
| 99056_at    | Pcbd1         | pterin 4 alpha carbinolamine deh                   | 882.44  | 294.44  | 3.00  | 0.00167641 |
| 94983_at    | 1810073G14Rik | RIKEN cDNA 1810073G14 gene                         | 702.86  | 222.84  | 3.15  | 0.00168279 |
| 161066_at   | Alg5          | asparagine-linked glycosylation 5                  | 166.40  | 61.97   | 2.69  | 0.00168506 |
| 162448_f_at | Hspb8         | heat shock protein 8                               | 251.07  | 112.20  | 2.24  | 0.00168712 |
| 101562_at   | Hspa14        | heat shock protein 14                              | 365.67  | 150.24  | 2.43  | 0.00169406 |
| 103969_at   | Mll5          | myeloid/lymphoid or mixed-linea                    | 528.49  | 1120.70 | -2.12 | 0.00169813 |
| 93043_at    | Nptn          | neuroplastin                                       | 3772.18 | 1743.19 | 2.16  | 0.00170181 |
| 96135_at    | 3110003A17Rik | RIKEN cDNA 3110003A17 gene                         | 298.19  | 623.59  | -2.09 | 0.0017035  |
| 98989_at    | Dhcr7         | 7-dehydrocholesterol reductase                     | 366.28  | 146.27  | 2.50  | 0.00170458 |
| 160577_at   | Atp9a         | ATPase, class II, type 9A                          | 7483.67 | 2904.94 | 2.58  | 0.00170499 |
| 93337_at    | Vps4b         | vacuolar protein sorting 4b (yeas                  | 2067.60 | 498.76  | 4.15  | 0.00170708 |
| 95886_g_at  | Crebbp        | CREB binding protein                               | 3050.20 | 1288.48 | 2.37  | 0.00171611 |
| 96152_at    | Narg1         | NMDA receptor-regulated gene 1                     | 973.44  | 366.31  | 2.66  | 0.00171809 |

|             |                     |                                     |         |         |       |            |
|-------------|---------------------|-------------------------------------|---------|---------|-------|------------|
| 104306_at   | Dpp3                | dipeptidylpeptidase 3               | 1099.37 | 330.66  | 3.32  | 0.00171826 |
| 161799_r_at | Kcnj9               | potassium inwardly-rectifying cha   | 534.10  | 207.12  | 2.58  | 0.00174037 |
| 103422_at   | Cd1d1               | CD1d1 antigen                       | 943.17  | 168.62  | 5.59  | 0.00174948 |
| 160397_at   | Ik                  | IK cytokine                         | 904.00  | 270.05  | 3.35  | 0.00175685 |
| 94433_at    | Slc38a2             | solute carrier family 38, member    | 1915.10 | 800.08  | 2.39  | 0.00177202 |
| 98463_at    | Smarca4             | SWI/SNF related, matrix associat    | 2652.41 | 1267.63 | 2.09  | 0.0017768  |
| 97131_at    | LOC100047492 /// St | serine/threonine kinase 11 intera   | 844.91  | 248.54  | 3.40  | 0.00180076 |
| 99180_at    | Gtpbp4              | GTP binding protein 4               | 1790.76 | 669.11  | 2.68  | 0.00181382 |
| 160320_at   | Sorbs1              | sorbin and SH3 domain containin     | 730.90  | 309.26  | 2.36  | 0.00181547 |
| 103316_at   | Camsap1             | calmodulin regulated spectrin-as    | 1008.10 | 465.66  | 2.16  | 0.00181862 |
| 94015_at    | Th1l                | TH1-like homolog (Drosophila)       | 1178.97 | 519.86  | 2.27  | 0.00183025 |
| 102571_at   | Gjb6                | gap junction protein, beta 6        | 119.84  | 268.67  | -2.24 | 0.00183674 |
| 92571_at    | Hspa4               | heat shock protein 4                | 599.09  | 121.10  | 4.95  | 0.00184318 |
| 98918_at    | Txndc5              | thioredoxin domain containing 5     | 3820.72 | 1601.33 | 2.39  | 0.00184458 |
| 92848_at    | Oat                 | ornithine aminotransferase          | 2187.80 | 624.62  | 3.50  | 0.00184523 |
| 98596_s_at  | St3gal5             | ST3 beta-galactoside alpha-2,3-si   | 3169.70 | 1322.13 | 2.40  | 0.00184547 |
| 100571_at   | Laptm4b             | lysosomal-associated protein tra    | 2369.41 | 1125.34 | 2.11  | 0.0018459  |
| 96240_at    | Tmem106c            | transmembrane protein 106C          | 1404.11 | 546.65  | 2.57  | 0.00185299 |
| 98410_at    | Iigp2               | interferon inducible GTPase 2       | 771.36  | 363.36  | 2.12  | 0.00185421 |
| 99923_at    | Pcf11               | cleavage and polyadenylation fac    | 53.03   | 134.74  | -2.54 | 0.00189815 |
| 160565_at   | Ckmt1               | creatine kinase, mitochondrial 1,   | 1326.06 | 472.79  | 2.80  | 0.00190635 |
| 94058_r_at  | Scd1                | stearoyl-Coenzyme A desaturase      | 433.15  | 189.61  | 2.28  | 0.00192294 |
| 104725_at   | Rhoq                | ras homolog gene family, membe      | 866.61  | 329.06  | 2.63  | 0.00193213 |
| 97497_at    | Notch1              | Notch gene homolog 1 (Drosophi      | 1279.26 | 600.77  | 2.13  | 0.00193552 |
| 98511_at    | Raly                | hnRNP-associated with lethal yell   | 477.57  | 215.29  | 2.22  | 0.00194734 |
| 96703_at    | Maged1              | melanoma antigen, family D, 1       | 7870.54 | 2956.51 | 2.66  | 0.00195134 |
| 102922_at   | Pitpnc1             | phosphatidylinositol transfer pro   | 1774.75 | 703.22  | 2.52  | 0.00198526 |
| 92703_at    | Pbrm1               | polybromo 1                         | 999.37  | 469.37  | 2.13  | 0.00198802 |
| 161081_at   | Cpeb2               | cytoplasmic polyadenylation eler    | 126.59  | 557.48  | -4.40 | 0.00199249 |
| 99597_at    | Gnai2               | guanine nucleotide binding prote    | 2405.30 | 942.21  | 2.55  | 0.00199801 |
| 92579_at    | Ssb                 | Sjogren syndrome antigen B          | 128.74  | 277.12  | -2.15 | 0.00199904 |
| 92818_at    | Uba3                | ubiquitin-like modifier activating  | 653.22  | 270.31  | 2.42  | 0.00200453 |
| 95731_at    | LOC100047324 /// Se | sestrin 1 /// similar to Sesn1 prot | 386.71  | 820.77  | -2.12 | 0.00200777 |
| 93151_at    | Cpne6               | copine VI                           | 2824.06 | 787.98  | 3.58  | 0.00202277 |
| 99988_at    | Dym                 | dymeclin                            | 1367.94 | 457.77  | 2.99  | 0.00203533 |
| 96122_at    | Cmb1                | carboxymethylenebutenolidase-I      | 625.77  | 157.72  | 3.97  | 0.00205021 |
| 92551_at    | Lig1                | ligase I, DNA, ATP-dependent        | 797.30  | 391.27  | 2.04  | 0.00207001 |
| 92346_at    | Nefm                | neurofilament, medium polypept      | 1481.17 | 326.80  | 4.53  | 0.00207755 |
| 95123_at    | Zfp821              | zinc finger protein 821             | 737.12  | 300.32  | 2.45  | 0.00208735 |
| 98475_at    | Matn2               | matrilin 2                          | 156.84  | 42.73   | 3.67  | 0.0021023  |
| 99150_at    | Ict1                | immature colon carcinoma trans      | 216.17  | 568.66  | -2.63 | 0.00210318 |
| 96351_at    | Btf3l4              | basic transcription factor 3-like 4 | 196.60  | 490.91  | -2.50 | 0.00210825 |
| 102926_at   | Gfra3 /// LOC100045 | glial cell line derived neurotrophi | 3327.85 | 432.83  | 7.69  | 0.00210931 |
| 97330_at    | Abcf1               | ATP-binding cassette, sub-family    | 2747.42 | 1133.43 | 2.42  | 0.0021201  |
| 101475_at   | Bmi1                | Bmi1 polycomb ring finger oncog     | 1174.94 | 2374.66 | -2.02 | 0.00212828 |
| 162030_r_at | LOC100044204 /// Se | selenium binding protein 1 /// se   | 708.38  | 271.32  | 2.61  | 0.0021506  |
| 94294_at    | Ccnb2               | cyclin B2                           | 385.32  | 913.00  | -2.37 | 0.00215159 |
| 92581_at    | Acadm               | acyl-Coenzyme A dehydrogenase       | 995.98  | 332.39  | 3.00  | 0.00215404 |
| 95094_g_at  | Ccar1               | cell division cycle and apoptosis r | 64.99   | 138.57  | -2.13 | 0.00215935 |
| 95288_i_at  | Ccdc88a             | coiled coil domain containing 88A   | 68.74   | 250.76  | -3.65 | 0.0021641  |
| 94269_at    | Rabac1              | Rab acceptor 1 (prenylated)         | 3072.75 | 6244.45 | -2.03 | 0.00216679 |
| 93464_at    | Akap9               | A kinase (PRKA) anchor protein (γ   | 271.41  | 88.46   | 3.07  | 0.00216693 |
| 97433_at    | Mcm3ap              | minichromosome maintenance d        | 619.47  | 299.08  | 2.07  | 0.00217814 |
| 160376_at   | Trp53inp2           | transformation related protein 5:   | 692.78  | 1630.51 | -2.35 | 0.00221022 |
| 102316_at   | Capn5               | calpain 5                           | 2007.82 | 322.32  | 6.23  | 0.00221982 |

|             |                       |                                     |          |         |        |            |
|-------------|-----------------------|-------------------------------------|----------|---------|--------|------------|
| 100041_at   | Slc25a39              | solute carrier family 25, member    | 4590.49  | 2132.45 | 2.15   | 0.0022241  |
| 98927_at    | Rab6                  | RAB6, member RAS oncogene fa        | 3529.00  | 1224.78 | 2.88   | 0.00223027 |
| 92380_r_at  | Ptprz1                | protein tyrosine phosphatase, re    | 23.63    | 65.94   | -2.79  | 0.00223917 |
| 95397_at    | D430019H16Rik         | RIKEN cDNA D430019H16 gene          | 3311.86  | 1163.59 | 2.85   | 0.00224277 |
| 99032_at    | Rasd1                 | RAS, dexamethasone-induced 1        | 479.83   | 93.81   | 5.11   | 0.00225359 |
| 101921_at   | Rab4a                 | RAB4A, member RAS oncogene fi       | 268.89   | 542.28  | -2.02  | 0.00225543 |
| 97401_at    | Josd1 /// LOC100043   | Josephin domain containing 1 ///    | 1218.29  | 432.38  | 2.82   | 0.00226286 |
| 95717_at    | Elp3                  | elongation protein 3 homolog (S.    | 2048.99  | 1005.23 | 2.04   | 0.00229233 |
| 103998_at   | Kif16b                | kinesin family member 16B           | 178.00   | 54.76   | 3.25   | 0.00232583 |
| 103225_at   | Dnase1l1              | deoxyribonuclease 1-like 1          | 280.86   | 72.11   | 3.89   | 0.0023681  |
| 93270_at    | Gars                  | glycyl-tRNA synthetase              | 2294.80  | 842.49  | 2.72   | 0.00237288 |
| 92202_g_at  | Zbtb16                | zinc finger and BTB domain conta    | 54.66    | 151.16  | -2.77  | 0.00237556 |
| 100440_f_at | Ank1                  | ankyrin 1, erythroid                | 11935.79 | 3590.47 | 3.32   | 0.00239217 |
| 97930_f_at  | Cd151                 | CD151 antigen                       | 3029.54  | 743.09  | 4.08   | 0.0023977  |
| 92423_at    | Pard6a                | par-6 (partitioning defective 6,) h | 307.32   | 875.22  | -2.85  | 0.00241598 |
| 98863_at    | Grik2                 | glutamate receptor, ionotropic, k   | 51.91    | 107.27  | -2.07  | 0.00241841 |
| 160173_at   | Meg3                  | maternally expressed 3              | 242.66   | 544.77  | -2.24  | 0.00241995 |
| 162011_f_at | Rhou                  | ras homolog gene family, membe      | 1938.83  | 847.45  | 2.29   | 0.00242166 |
| 92513_at    | Stag2                 | stromal antigen 2                   | 558.39   | 1257.80 | -2.25  | 0.0024233  |
| 101650_at   | LOC100046214 /// Pc   | protocadherin alpha 4 /// protoc    | 5522.16  | 2097.88 | 2.63   | 0.0024298  |
| 96902_at    | Ccdc53                | coiled-coil domain containing 53    | 245.16   | 117.15  | 2.09   | 0.00243021 |
| 97312_at    | Cd164                 | CD164 antigen                       | 2157.95  | 715.20  | 3.02   | 0.00244257 |
| 97871_at    | Ero1l                 | ERO1-like (S. cerevisiae)           | 1237.76  | 503.63  | 2.46   | 0.00244488 |
| 95626_at    | Xpc                   | xeroderma pigmentosum, compl        | 393.30   | 190.37  | 2.07   | 0.00246388 |
| 92671_f_at  | Rgl1                  | ral guanine nucleotide dissociati   | 216.91   | 68.16   | 3.18   | 0.00246748 |
| 102993_at   | Ggta1                 | glycoprotein galactosyltransferas   | 1178.30  | 399.24  | 2.95   | 0.00249828 |
| 96822_at    | Eif2b5                | eukaryotic translation initiation f | 995.82   | 311.55  | 3.20   | 0.00250721 |
| 94977_at    | Itpr1                 | inositol 1,4,5-triphosphate recep   | 100.57   | 1129.31 | -11.23 | 0.0025075  |
| 96572_at    | Azi2                  | 5-azacytidine induced gene 2        | 1274.35  | 417.41  | 3.05   | 0.0025146  |
| 99440_at    | Nfib                  | nuclear factor I/B                  | 287.83   | 962.39  | -3.34  | 0.0025261  |
| 160625_f_at | Mettl8                | methyltransferase like 8            | 1309.28  | 535.76  | 2.44   | 0.00256689 |
| 96735_at    | Stard10               | START domain containing 10          | 1502.01  | 646.87  | 2.32   | 0.00257968 |
| 101070_at   | Mkrn1                 | makorin, ring finger protein, 1     | 401.77   | 805.50  | -2.00  | 0.00260242 |
| 100033_at   | Msh2                  | mutS homolog 2 (E. coli)            | 1853.90  | 601.77  | 3.08   | 0.00260811 |
| 103011_at   | Sin3a                 | transcriptional regulator, SIN3A (  | 2718.71  | 1222.09 | 2.22   | 0.00262216 |
| 92355_at    | Zfpn2                 | zinc finger protein, multitype 2    | 74.00    | 205.40  | -2.78  | 0.00263127 |
| 104242_f_at | 6530401N04Rik /// Lf  | RIKEN cDNA 6530401N04 gene //,      | 1249.67  | 567.45  | 2.20   | 0.00263267 |
| 95978_at    | Atp13a3               | ATPase type 13A3                    | 319.18   | 147.08  | 2.17   | 0.00265066 |
| 101876_s_at | H2-T10 /// H2-T17 /// | histocompatibility 2, T region loci | 598.54   | 201.61  | 2.97   | 0.00265301 |
| 95479_at    | C1d                   | nuclear DNA binding protein         | 92.47    | 201.65  | -2.18  | 0.00266277 |
| 161750_f_at | Ncam1                 | neural cell adhesion molecule 1     | 1146.34  | 344.16  | 3.33   | 0.00266875 |
| 95128_at    | Anapc2                | anaphase promoting complex sul      | 1844.84  | 687.64  | 2.68   | 0.00272325 |
| 101074_at   | Ddost                 | dolichyl-di-phosphooligosacchari    | 1217.40  | 461.96  | 2.64   | 0.00273503 |
| 97489_at    | Pygb                  | brain glycogen phosphorylase        | 1729.20  | 341.70  | 5.06   | 0.0027424  |
| 101421_at   | Rnf5                  | ring finger protein 5               | 704.05   | 1680.03 | -2.39  | 0.00274267 |
| 94925_at    | Dnajc19               | DnaJ (Hsp40) homolog, subfamily     | 62.02    | 148.13  | -2.39  | 0.00274754 |
| 100953_at   | Timeless              | timeless homolog (Drosophila)       | 4304.86  | 758.41  | 5.68   | 0.00275649 |
| 162444_r_at | Tinf2                 | Terf1 (TRF1)-interacting nuclear f  | 74.06    | 165.83  | -2.24  | 0.00275649 |
| 104189_at   | Traf6                 | Tnf receptor-associated factor 6    | 668.44   | 243.23  | 2.75   | 0.00275768 |
| 95756_at    | Ftsj3                 | FtsJ homolog 3 (E. coli)            | 345.56   | 57.68   | 5.99   | 0.00276885 |
| 99345_at    | Mphosph9              | M-phase phosphoprotein 9            | 1124.93  | 390.50  | 2.88   | 0.00278187 |
| 97713_at    | Pdxdc1                | pyridoxal-dependent decarboxyl      | 2401.18  | 342.60  | 7.01   | 0.00278309 |
| 160739_at   | Wnk1                  | WNK lysine deficient protein kina   | 825.39   | 133.74  | 6.17   | 0.00281901 |
| 98409_at    | Myo1b                 | myosin IB                           | 1040.23  | 477.16  | 2.18   | 0.0028482  |
| 101581_at   | Ube3a                 | ubiquitin protein ligase E3A        | 305.60   | 106.76  | 2.86   | 0.00286997 |

|                |                     |                                                                            |         |         |       |            |
|----------------|---------------------|----------------------------------------------------------------------------|---------|---------|-------|------------|
| 101000_at      | Oaz2                | ornithine decarboxylase antizyme                                           | 2865.73 | 1266.78 | 2.26  | 0.0028935  |
| 93951_at       | Golga3              | golgi autoantigen, golgin subfamily 3                                      | 1213.51 | 468.64  | 2.59  | 0.00291994 |
| 100902_at      | 2610019F03Rik       | RIKEN cDNA 2610019F03 gene                                                 | 708.70  | 249.24  | 2.84  | 0.002954   |
| 99832_at       | Kcnmb1              | potassium large conductance calcium-activated channel subfamily B member 1 | 917.42  | 122.50  | 7.49  | 0.00295482 |
| 96623_at       | Ugcg                | UDP-glucose ceramide glucosyltransferase                                   | 2742.72 | 779.88  | 3.52  | 0.00295573 |
| 94289_r_at     | LOC100046560 /// M  | melanoma antigen, family D, 2 //                                           | 1670.58 | 728.42  | 2.29  | 0.00297697 |
| 104155_f_at    | Atf3                | activating transcription factor 3                                          | 399.83  | 182.73  | 2.19  | 0.0029857  |
| 93055_at       | Ankrd46             | ankyrin repeat domain 46                                                   | 322.27  | 751.82  | -2.33 | 0.00299759 |
| 104661_at      | D730040F13Rik       | RIKEN cDNA D730040F13 gene                                                 | 218.33  | 109.00  | 2.00  | 0.00301141 |
| 94009_at       | LOC100045866 /// Tc | transcription elongation factor B                                          | 255.56  | 705.94  | -2.76 | 0.00305197 |
| 93626_at       | Abcg2               | ATP-binding cassette, sub-family G, member 2                               | 1821.17 | 172.42  | 10.56 | 0.00306536 |
| 97484_at       | Zmynd11             | zinc finger, MYND domain containing 11                                     | 2746.21 | 1240.61 | 2.21  | 0.00307497 |
| 103926_at      | Eif4g1              | eukaryotic translation initiation factor 4 gamma 1                         | 946.96  | 205.55  | 4.61  | 0.00308018 |
| 100931_at      | Arsa                | arylsulfatase A                                                            | 570.82  | 269.36  | 2.12  | 0.00308182 |
| 104117_at      | Wdr20a              | WD repeat domain 20a                                                       | 95.98   | 293.87  | -3.06 | 0.00310289 |
| 98819_at       | Hoxd1               | homeo box D1                                                               | 578.18  | 171.54  | 3.37  | 0.00313148 |
| 103501_at      | LOC100045958 /// Pt | purine rich element binding protein 1                                      | 1791.77 | 683.34  | 2.62  | 0.00313376 |
| 95368_at       | Plxna2              | plexin A2                                                                  | 759.54  | 356.76  | 2.13  | 0.00313716 |
| 95035_at       | Ipo4                | importin 4                                                                 | 2484.40 | 744.67  | 3.34  | 0.00317533 |
| 95796_g_at     | Supt4h1 /// Supt4h2 | suppressor of Ty 4 homolog 1 (Scd4)                                        | 218.50  | 801.49  | -3.67 | 0.00318601 |
| 100569_at      | Anxa2               | annexin A2                                                                 | 9909.43 | 731.66  | 13.54 | 0.00318818 |
| 161111_f_at    | Dhh                 | desert hedgehog                                                            | 1879.62 | 664.78  | 2.83  | 0.00321316 |
| 99592_f_at     | Rdh11               | retinol dehydrogenase 11                                                   | 4312.07 | 2061.11 | 2.09  | 0.00321996 |
| 96199_at       | Mtm1                | X-linked myotubular myopathy gene 1                                        | 506.16  | 168.86  | 3.00  | 0.00324382 |
| 93246_at       | Narg1               | NMDA receptor-regulated gene 1                                             | 440.90  | 87.06   | 5.06  | 0.00324447 |
| 93145_at       | Gatad2a             | GATA zinc finger domain containing 2a                                      | 298.01  | 146.84  | 2.03  | 0.0032484  |
| 100597_at      | Gyg                 | glycogenin                                                                 | 355.01  | 134.50  | 2.64  | 0.00325219 |
| 96198_at       | Prkcζ               | protein kinase C, zeta                                                     | 1531.94 | 749.08  | 2.05  | 0.0032749  |
| 93512_f_at     | Adk                 | adenosine kinase                                                           | 1807.89 | 451.99  | 4.00  | 0.00329126 |
| 99113_at       | Cops3               | COP9 (constitutive photomorphogenesis-inducing factor 3)                   | 1635.08 | 606.54  | 2.70  | 0.00331082 |
| 104403_at      | 2700078E11Rik       | RIKEN cDNA 2700078E11 gene                                                 | 699.06  | 209.05  | 3.34  | 0.00332314 |
| 94406_at       | Phtf1               | putative homeodomain transcription factor 1                                | 1265.31 | 534.74  | 2.37  | 0.00348867 |
| 98503_at       | Evi5                | ecotropic viral integration site 5                                         | 1944.10 | 368.60  | 5.27  | 0.00352136 |
| 95501_at       | 2410001C21Rik       | RIKEN cDNA 2410001C21 gene                                                 | 1078.34 | 277.02  | 3.89  | 0.00354716 |
| 104011_at      | Aox1                | aldehyde oxidase 1                                                         | 1003.53 | 282.92  | 3.55  | 0.00356258 |
| 94027_at       | ---                 | Transcribed locus /// CDNA clone                                           | 302.26  | 713.70  | -2.36 | 0.00357635 |
| 160517_at      | Lmnb1               | lamin B1                                                                   | 189.04  | 441.25  | -2.33 | 0.00357983 |
| 96266_at       | Hnrpm               | heterogeneous nuclear ribonucleoprotein M                                  | 3819.50 | 1322.17 | 2.89  | 0.00360732 |
| 100516_at      | Chka                | choline kinase alpha                                                       | 1108.81 | 485.67  | 2.28  | 0.00361452 |
| 94278_at       | Lcp1                | lymphocyte cytosolic protein 1                                             | 1709.55 | 461.40  | 3.71  | 0.00367235 |
| 100513_at      | Ddef1               | development and differentiation 1                                          | 1973.98 | 627.81  | 3.14  | 0.00368741 |
| 101084_f_at    | Dpm3                | dolichyl-phosphate mannosyltransferase 3                                   | 469.02  | 1047.51 | -2.23 | 0.00368846 |
| 97456_at       | Acsl5               | acyl-CoA synthetase long-chain family 5                                    | 926.51  | 118.75  | 7.80  | 0.00372991 |
| 161086_at      | Lin7c               | lin-7 homolog C (C. elegans)                                               | 47.85   | 121.39  | -2.54 | 0.00375702 |
| 96836_r_at     | Zfp161              | zinc finger protein 161                                                    | 99.63   | 46.42   | 2.15  | 0.00378664 |
| 97760_at       | A730034C02 /// Mta1 | microtubule-associated protein 2                                           | 112.77  | 259.60  | -2.30 | 0.003807   |
| 100324_g_at    | Amd-ps3 /// Amd1 // | S-adenosylmethionine decarboxylase 1                                       | 32.18   | 65.05   | -2.02 | 0.00382927 |
| 100013_at      | Ifi35               | interferon-induced protein 35                                              | 655.76  | 247.90  | 2.65  | 0.00385579 |
| 92208_at       | Caprin2             | caprin family member 2                                                     | 1671.26 | 272.71  | 6.13  | 0.00386477 |
| 96186_at       | Lrp10               | low-density lipoprotein receptor-related protein 10                        | 741.30  | 355.29  | 2.09  | 0.00387127 |
| 96284_at       | Csnk1g2             | casein kinase 1, gamma 2                                                   | 3141.05 | 1492.33 | 2.10  | 0.00387773 |
| AFFX-18SRNAMur | ---                 | ---                                                                        | 1998.43 | 115.46  | 17.31 | 0.00387965 |
| 160458_at      | Mcam                | melanoma cell adhesion molecule                                            | 1748.03 | 634.03  | 2.76  | 0.00389737 |
| 95705_s_at     | Actb                | actin, beta, cytoplasmic                                                   | 194.81  | 705.89  | -3.62 | 0.0039116  |
| 94872_at       | Smpdl3a             | sphingomyelin phosphodiesterase 3A                                         | 421.05  | 159.70  | 2.64  | 0.00391913 |

|             |                    |                                     |         |         |        |            |
|-------------|--------------------|-------------------------------------|---------|---------|--------|------------|
| 100388_at   | Gnao1              | guanine nucleotide binding prote    | 200.20  | 421.89  | -2.11  | 0.00395244 |
| 96650_at    | Auh                | AU RNA binding protein/enoyl-cc     | 1648.44 | 671.46  | 2.46   | 0.00395632 |
| 101356_at   | Tk2                | thymidine kinase 2, mitochondria    | 271.11  | 122.74  | 2.21   | 0.00395709 |
| 103799_at   | Mtmt9              | myotubularin related protein 9      | 698.65  | 183.49  | 3.81   | 0.00398486 |
| 102225_at   | Rabgap1l           | RAB GTPase activating protein 1-    | 180.38  | 376.89  | -2.09  | 0.00399046 |
| 93330_at    | Aqp1               | aquaporin 1                         | 1466.67 | 258.59  | 5.67   | 0.00400373 |
| 99045_at    | Eno2               | enolase 2, gamma neuronal           | 4575.25 | 1825.50 | 2.51   | 0.00404202 |
| 102853_at   | Smc3               | structural maintenance of chromo    | 96.58   | 239.47  | -2.48  | 0.00405202 |
| 101040_at   | Capn2              | calpain 2                           | 1480.24 | 198.89  | 7.44   | 0.00406038 |
| 160264_s_at | Pcp4l1             | Purkinje cell protein 4-like 1      | 1719.70 | 167.21  | 10.28  | 0.00410819 |
| 103836_at   | Wbp4               | WW domain binding protein 4         | 1309.92 | 417.95  | 3.13   | 0.0041205  |
| 92940_s_at  | Gabra6             | gamma-aminobutyric acid (GABA       | 117.95  | 2424.27 | -20.55 | 0.00414133 |
| 160629_at   | Rgs10              | regulator of G-protein signalling   | 1155.47 | 465.66  | 2.48   | 0.0041589  |
| 96803_at    | Gbe1               | glucan (1,4-alpha-), branching en   | 134.98  | 63.97   | 2.11   | 0.00417846 |
| 101990_at   | Ldhd               | lactate dehydrogenase B             | 1557.63 | 674.36  | 2.31   | 0.00422439 |
| 99955_at    | Numb               | numb gene homolog (Drosophila       | 151.38  | 74.86   | 2.02   | 0.00428925 |
| 94963_at    | Vcl                | vinculin                            | 1305.50 | 377.89  | 3.45   | 0.00430214 |
| 92938_at    | Gabra1             | gamma-aminobutyric acid (GABA       | 44.28   | 239.94  | -5.42  | 0.00437317 |
| 98535_at    | Comt               | catechol-O-methyltransferase        | 1135.71 | 402.15  | 2.82   | 0.00445428 |
| 162255_s_at | Scn1a              | sodium channel, voltage-gated, t    | 1382.78 | 408.62  | 3.38   | 0.00448127 |
| 100494_at   | Fgf1               | fibroblast growth factor 1          | 1935.86 | 332.27  | 5.83   | 0.00454002 |
| 99475_at    | Socs2              | suppressor of cytokine signaling    | 2075.59 | 830.80  | 2.50   | 0.00456552 |
| 98894_at    | Pbrm1              | polybromo 1                         | 489.99  | 238.98  | 2.05   | 0.00456624 |
| 93807_at    | 2310016E02Rik      | RIKEN cDNA 2310016E02 gene          | 520.21  | 185.98  | 2.80   | 0.00460876 |
| 161010_r_at | Cdkn1b             | cyclin-dependent kinase inhibitor   | 29.08   | 72.25   | -2.48  | 0.00468405 |
| 101587_at   | Ephx1              | epoxide hydrolase 1, microsomal     | 2596.55 | 639.48  | 4.06   | 0.00468867 |
| 97844_at    | Rgs2               | regulator of G-protein signaling 2  | 888.56  | 397.95  | 2.23   | 0.00472162 |
| 160698_s_at | Prkcd              | protein kinase C, delta             | 2333.72 | 1002.14 | 2.33   | 0.00475484 |
| 104015_at   | Metap1             | methionyl aminopeptidase 1          | 3114.85 | 771.02  | 4.04   | 0.00476106 |
| 161075_at   | D9Ert280e          | DNA segment, Chr 9, ERATO Doi       | 529.61  | 96.06   | 5.51   | 0.00476143 |
| 99672_at    | Clcn4-2            | chloride channel 4-2                | 2351.91 | 374.56  | 6.28   | 0.0048888  |
| 92456_at    | Taf1c              | TATA box binding protein (Tbp)-a    | 870.93  | 418.50  | 2.08   | 0.00491616 |
| 94940_at    | Mccc1              | methylcrotonoyl-Coenzyme A car      | 541.40  | 226.57  | 2.39   | 0.00494735 |
| 93001_at    | Six4               | sine oculis-related homeobox 4 h    | 107.98  | 41.22   | 2.62   | 0.00503591 |
| 103443_at   | Aim1               | absent in melanoma 1                | 474.51  | 224.40  | 2.11   | 0.00504332 |
| 162037_f_at | Npy2r              | neuropeptide Y receptor Y2          | 3483.32 | 614.71  | 5.67   | 0.00507511 |
| 103017_at   | Gpr137b-ps         | G protein-coupled receptor 137B     | 824.54  | 359.63  | 2.29   | 0.0051087  |
| 99080_at    | Ccdc6              | coiled-coil domain containing 6     | 1137.65 | 290.49  | 3.92   | 0.00513876 |
| 93908_f_at  | Ccrn4l /// ENSMUSG | CCR4 carbon catabolite repressio    | 130.32  | 644.97  | -4.95  | 0.00516852 |
| 94790_at    | Ag1                | amylase-1,6-glycosidase, 4-alpha-g  | 179.40  | 52.68   | 3.41   | 0.00516932 |
| 94363_at    | Bms1               | BMS1 homolog, ribosome assembl      | 268.19  | 130.16  | 2.06   | 0.00518245 |
| 160682_at   | 6430706D22Rik      | RIKEN cDNA 6430706D22 gene          | 858.75  | 391.75  | 2.19   | 0.00521765 |
| 95036_at    | Calb2              | calbindin 2                         | 465.55  | 1165.05 | -2.50  | 0.00527973 |
| 92995_at    | Vsn1               | visinin-like 1                      | 786.43  | 1665.10 | -2.12  | 0.00527999 |
| 93299_at    | LOC633695 /// Msh6 | mutS homolog 6 (E. coli) /// simil  | 125.22  | 270.31  | -2.16  | 0.00530844 |
| 101053_at   | Prpf6              | PRP6 pre-mRNA splicing factor 6     | 2253.10 | 1037.50 | 2.17   | 0.00534419 |
| 99007_at    | Flot2              | flotillin 2                         | 1589.79 | 717.82  | 2.21   | 0.00534435 |
| 99669_at    | Lgals1             | lectin, galactose binding, soluble  | 1342.23 | 638.95  | 2.10   | 0.0053463  |
| 98820_g_at  | Hoxd1              | homeo box D1                        | 571.93  | 29.25   | 19.55  | 0.00541436 |
| 95432_f_at  | Tom70a             | translocase of outer mitochondria   | 7510.01 | 2468.10 | 3.04   | 0.00542364 |
| 95393_at    | Btd3               | BTB (POZ) domain containing 3       | 299.17  | 1011.68 | -3.38  | 0.00549181 |
| 99042_s_at  | Shox2              | short stature homeobox 2            | 505.48  | 169.14  | 2.99   | 0.00552048 |
| 94250_at    | Eif3s10            | eukaryotic translation initiation f | 238.69  | 483.56  | -2.03  | 0.00552278 |
| 92252_at    | Cckar              | cholecystokinin A receptor          | 1016.23 | 141.06  | 7.20   | 0.00560415 |
| 160399_r_at | H2afy              | H2A histone family, member Y        | 251.08  | 514.02  | -2.05  | 0.00561535 |



|                |                     |                                      |         |         |       |            |
|----------------|---------------------|--------------------------------------|---------|---------|-------|------------|
| 98490_at       | Arl8b               | ADP-ribosylation factor-like 8B      | 48.31   | 107.82  | -2.23 | 0.00562326 |
| 99365_at       | Coq3                | coenzyme Q3 homolog, methyltr        | 652.58  | 314.00  | 2.08  | 0.00564228 |
| 96222_at       | BC003993            | cDNA sequence BC003993               | 193.48  | 83.26   | 2.32  | 0.00564565 |
| 98924_at       | Art3                | ADP-ribosyltransferase 3             | 222.70  | 76.23   | 2.92  | 0.00565865 |
| 93346_at       | Pgk1                | phosphoglycerate kinase 1            | 4179.96 | 2044.54 | 2.04  | 0.00567918 |
| 103789_at      | Brd4                | bromodomain containing 4             | 1707.25 | 306.02  | 5.58  | 0.00570802 |
| 160610_at      | LOC100046214 /// Pc | protocadherin alpha 4 /// protoc     | 3735.50 | 847.55  | 4.41  | 0.00573388 |
| 92795_at       | Mtap4               | microtubule-associated protein 4     | 1483.09 | 519.54  | 2.85  | 0.00582564 |
| 95594_at       | Mfn1                | mitofusin 1                          | 1052.85 | 508.45  | 2.07  | 0.00585769 |
| 97446_at       | Dhx30               | DEAH (Asp-Glu-Ala-His) box polyr     | 2121.42 | 992.37  | 2.14  | 0.00593906 |
| 93005_at       | Syt1                | synaptotagmin I                      | 56.46   | 554.29  | -9.82 | 0.00595194 |
| 92239_at       | Elavl3              | ELAV (embryonic lethal, abnorma      | 642.44  | 305.88  | 2.10  | 0.0060437  |
| 94865_at       | Ublcp1              | ubiquitin-like domain containing     | 1299.76 | 404.42  | 3.21  | 0.0060754  |
| 104254_at      | Ralgps2             | Ral GEF with PH domain and SH3       | 389.86  | 165.66  | 2.35  | 0.0060807  |
| 94712_at       | Vegfc               | vascular endothelial growth factc    | 53.51   | 137.25  | -2.56 | 0.00608073 |
| AFFX-18SRNAMur | ---                 | ---                                  | 1608.32 | 724.46  | 2.22  | 0.00610947 |
| 101099_at      | Nsg1                | neuron specific gene family mem      | 304.02  | 644.25  | -2.12 | 0.00611808 |
| 160772_i_at    | Slu7                | SLU7 splicing factor homolog (S. c   | 859.93  | 350.15  | 2.46  | 0.00616728 |
| 160859_s_at    | Nfib                | nuclear factor I/B                   | 248.86  | 1049.38 | -4.22 | 0.00641608 |
| 160843_at      | LOC100046080 /// Sp | spindlin 1 /// similar to Spindlin 1 | 71.81   | 189.57  | -2.64 | 0.00644115 |
| 96610_at       | Atp6v1h             | ATPase, H+ transporting, lysosom     | 2719.94 | 1114.94 | 2.44  | 0.00667948 |
| 94809_at       | Tsg101              | tumor susceptibility gene 101        | 459.87  | 181.32  | 2.54  | 0.00675387 |
| 103913_at      | Sec61a2             | Sec61, alpha subunit 2 (S. cerevis   | 2370.55 | 972.41  | 2.44  | 0.00685783 |
| 94060_at       | Kctd10              | potassium channel tetramerisatic     | 2942.98 | 729.62  | 4.03  | 0.00692238 |
| 99067_at       | Gas6                | growth arrest specific 6             | 1645.36 | 667.95  | 2.46  | 0.00708643 |
| 103433_at      | Pscd3               | pleckstrin homology, Sec7 and cc     | 1047.30 | 520.43  | 2.01  | 0.00710633 |
| 96879_at       | Ogdh                | oxoglutarate dehydrogenase (lipr     | 3196.59 | 1517.81 | 2.11  | 0.00712109 |
| 98539_at       | Cops2               | COP9 (constitutive photomorpho       | 76.99   | 210.29  | -2.73 | 0.00726766 |
| 97853_at       | Psip1               | PC4 and SFRS1 interacting protei     | 151.57  | 313.94  | -2.07 | 0.00727755 |
| 104327_at      | 9030612M13Rik       | RIKEN cDNA 9030612M13 gene           | 166.94  | 370.52  | -2.22 | 0.00731531 |
| 103492_at      | Cpxm1               | carboxypeptidase X 1 (M14 famil      | 298.91  | 121.96  | 2.45  | 0.00736773 |
| 92989_f_at     | Cadps               | Ca2+-dependent secretion activa      | 4651.22 | 2276.32 | 2.04  | 0.00751463 |
| 161959_f_at    | Lrrn1               | leucine rich repeat protein 1, neu   | 86.60   | 31.61   | 2.74  | 0.00753001 |
| 104337_f_at    | Pkp2                | plakophilin 2                        | 784.00  | 155.64  | 5.04  | 0.00770328 |
| 99350_at       | Sec63               | SEC63-like (S. cerevisiae)           | 257.11  | 104.13  | 2.47  | 0.00775682 |
| 94484_at       | Hbs1l               | Hbs1-like (S. cerevisiae)            | 1675.70 | 824.56  | 2.03  | 0.00780518 |
| 100464_at      | 3110043O21Rik       | RIKEN cDNA 3110043O21 gene           | 1088.92 | 317.14  | 3.43  | 0.00798886 |
| AFFX-PheX-3_at | ---                 | ---                                  | 581.69  | 205.56  | 2.83  | 0.00804573 |
| 93534_at       | Dcn                 | decorin                              | 4343.36 | 821.73  | 5.29  | 0.00822545 |
| 104018_at      | Lct                 | lactase                              | 174.12  | 79.87   | 2.18  | 0.00831844 |
| 99364_at       | Rbbp6               | retinoblastoma binding protein 6     | 42.61   | 98.88   | -2.32 | 0.00850596 |
| 160812_at      | Gga2                | golgi associated, gamma adaptin      | 1644.24 | 579.97  | 2.84  | 0.00854057 |
| 100056_at      | Fbxw2               | F-box and WD-40 domain proteir       | 1779.93 | 883.46  | 2.01  | 0.0085562  |
| AFFX-ThrX-3_at | ---                 | ---                                  | 681.55  | 109.96  | 6.20  | 0.00880106 |
| 96545_s_at     | Pcid2               | PCI domain containing 2              | 206.48  | 94.52   | 2.18  | 0.00888187 |
| 98984_f_at     | Gpd2                | glycerol phosphate dehydrogena       | 1063.79 | 516.90  | 2.06  | 0.00889077 |
| 103459_at      | Slc39a6             | solute carrier family 39 (metal ion  | 1730.30 | 578.63  | 2.99  | 0.00903138 |
| 95433_at       | Ddx54               | DEAD (Asp-Glu-Ala-Asp) box poly      | 725.65  | 270.79  | 2.68  | 0.0091002  |
| 160906_i_at    | ---                 | ---                                  | 151.64  | 38.69   | 3.92  | 0.00913133 |
| 97317_at       | Enpp2               | ectonucleotide pyrophosphatase       | 310.97  | 2508.52 | -8.07 | 0.00940243 |
| 99489_at       | Hspa4l              | heat shock protein 4 like            | 979.40  | 469.80  | 2.08  | 0.00940666 |
| 101561_at      | Mt2                 | metallothionein 2                    | 935.57  | 2327.18 | -2.49 | 0.00946029 |
| 160167_at      | Nup62               | nucleoporin 62                       | 1466.54 | 691.29  | 2.12  | 0.00950681 |
| 96747_at       | Rhou                | ras homolog gene family, membe       | 1604.29 | 528.00  | 3.04  | 0.00957993 |
| 94006_at       | Azi2                | 5-azacytidine induced gene 2         | 263.21  | 96.45   | 2.73  | 0.00963317 |

|            |       |                                      |        |        |       |            |
|------------|-------|--------------------------------------|--------|--------|-------|------------|
| 96656_at   | Wdr48 | WD repeat domain 48                  | 173.38 | 348.36 | -2.01 | 0.0096476  |
| 98336_s_at | Rfc1  | replication factor C (activator 1) 1 | 347.83 | 162.50 | 2.14  | 0.00995621 |
