# Supplementary material
Source: PubMed Central journal article supplement (PMC3003944)
Supplement: NIHMS229912-supplement-05.pdf [file NIHMS229912-supplement-05.pdf]

| TF                      | Network size | Source      | BH p-value |
|-------------------------|--------------|-------------|------------|
| AFX1                    | 51           | Microarray  | 8.30E-03   |
| AHR                     | 53           | Subtraction | 6.63E-04   |
| AHR                     | 57           | Microarray  | 8.38E-03   |
| ARNT                    | 50           | Subtraction | 6.56E-04   |
| BCL6                    | 51           | Subtraction | 6.12E-04   |
| BCL6                    | 53           | Microarray  | 2.96E-03   |
| BHLHE40                 | 50           | Subtraction | 2.03E-04   |
| BRCA1                   | 50           | Subtraction | 6.45E-04   |
| BRCA1                   | 51           | Microarray  | 8.52E-03   |
| CEBPZ                   | 52           | Subtraction | 7.42E-04   |
| CEBPZ                   | 51           | Microarray  | 1.22E-02   |
| CREB3                   | 51           | Subtraction | 8.21E-04   |
| E2F5                    | 50           | Microarray  | 9.86E-03   |
| EBF1                    | 51           | Microarray  | 4.17E-03   |
| ELF4                    | 51           | Subtraction | 8.00E-04   |
| ELK1                    | 51           | Microarray  | 1.24E-02   |
| EPAS1                   | 53           | Microarray  | 1.26E-02   |
| ESR2                    | 51           | Subtraction | 6.37E-04   |
| ESR2                    | 52           | Microarray  | 1.18E-02   |
| ESRR1                   | 56           | Subtraction | 4.79E-04   |
| ESRR1                   | 55           | Microarray  | 9.94E-03   |
| ETS2                    | 50           | Subtraction | 6.66E-04   |
| EWS/FLI1 fusion protein | 51           | Microarray  | 9.15E-03   |
| FOSL1                   | 50           | Microarray  | 9.61E-03   |
| FOXA2                   | 53           | Subtraction | 6.89E-04   |
| FOXO1                   | 55           | Subtraction | 5.37E-04   |
| FOXO1                   | 58           | Microarray  | 7.18E-03   |
| FOXP3                   | 51           | Subtraction | 7.80E-04   |
| FOXP3                   | 55           | Microarray  | 1.07E-02   |
| GABPA                   | 53           | Microarray  | 1.34E-02   |
| GATA3                   | 51           | Subtraction | 8.67E-04   |
| GATA3                   | 52           | Microarray  | 1.21E-02   |
| HAND1                   | 51           | Microarray  | 1.00E-02   |
| HIF1A                   | 52           | Subtraction | 8.19E-04   |
| HIF1A                   | 62           | Microarray  | 4.71E-03   |
| HIF1A/ARNT2             | 51           | Subtraction | 5.67E-04   |
| HIF1A/ARNT2             | 51           | Microarray  | 8.89E-03   |
| HNF1A                   | 60           | Subtraction | 1.87E-04   |
| HNF1A                   | 79           | Microarray  | 5.68E-04   |
| HNRNPD                  | 51           | Subtraction | 6.78E-04   |
| HOXB4                   | 50           | Subtraction | 6.77E-04   |
| HSF1                    | 58           | Subtraction | 3.09E-04   |
| HSF1                    | 67           | Microarray  | 2.88E-03   |
| HSF4                    | 51           | Microarray  | 1.07E-02   |
| IFNGR1                  | 50           | Subtraction | 7.38E-04   |
| IKZF1                   | 51           | Microarray  | 1.17E-02   |

x  
x

|               |    |             |          |
|---------------|----|-------------|----------|
| IRF1          | 54 | Subtraction | 1.12E-04 |
| IRF1          | 53 | Microarray  | 1.30E-02 |
| IRF2          | 51 | Subtraction | 5.78E-04 |
| IRF4          | 50 | Microarray  | 9.73E-03 |
| IRF7          | 51 | Microarray  | 1.05E-02 |
| IRF8          | 52 | Subtraction | 7.92E-04 |
| JUN           | 59 | Microarray  | 1.29E-03 |
| JUNB          | 51 | Subtraction | 1.85E-04 |
| JUNB          | 51 | Microarray  | 9.72E-03 |
| KAT5          | 51 | Microarray  | 1.02E-02 |
| KLF1          | 52 | Microarray  | 1.13E-02 |
| KLF13         | 51 | Microarray  | 1.04E-02 |
| KLF4          | 54 | Subtraction | 5.87E-04 |
| KLF4          | 52 | Microarray  | 1.34E-02 |
| LEF1          | 51 | Subtraction | 7.26E-04 |
| MAF           | 52 | Microarray  | 1.04E-02 |
| MBD1          | 51 | Microarray  | 1.20E-02 |
| MITF          | 51 | Subtraction | 7.43E-04 |
| MITF          | 52 | Microarray  | 1.27E-02 |
| MYBL2         | 53 | Microarray  | 1.16E-02 |
| MZF1          | 53 | Microarray  | 1.19E-02 |
| NANOG         | 59 | Microarray  | 6.14E-03 |
| NEUROD1       | 52 | Subtraction | 7.66E-04 |
| NFATC1        | 55 | Subtraction | 4.85E-04 |
| NFATC2        | 52 | Subtraction | 6.99E-04 |
| NF-kB p50/p65 | 53 | Subtraction | 7.46E-04 |
| NF-kB p50/p65 | 55 | Microarray  | 1.11E-02 |
| NF-Y          | 68 | Subtraction | 5.58E-05 |
| NFYA          | 52 | Microarray  | 1.24E-02 |
| NKX2-1        | 52 | Microarray  | 1.38E-02 |
| NME1          | 50 | Microarray  | 4.41E-03 |
| NME2          | 51 | Microarray  | 9.29E-03 |
| NR1I2         | 53 | Subtraction | 7.16E-04 |
| NR1I2         | 55 | Microarray  | 9.28E-03 |
| NR3C1         | 56 | Subtraction | 4.51E-04 |
| NR3C1         | 56 | Microarray  | 9.46E-03 |
| NR3C2         | 51 | Microarray  | 1.15E-02 |
| NR4A2         | 52 | Microarray  | 1.30E-02 |
| NR4A3         | 51 | Microarray  | 8.64E-03 |
| NR5A1         | 52 | Subtraction | 6.79E-04 |
| NR5A1         | 52 | Microarray  | 1.16E-02 |
| Oct-3/4       | 60 | Microarray  | 5.56E-03 |
| p21           | 50 | Subtraction | 1.86E-04 |
| PARP1         | 51 | Subtraction | 6.64E-04 |
| PAX4          | 50 | Subtraction | 7.12E-04 |
| PAX4          | 51 | Microarray  | 8.77E-03 |
| PAX5          | 52 | Microarray  | 1.11E-02 |

|           |    |             |          |
|-----------|----|-------------|----------|
| PITX2     | 50 | Subtraction | 7.00E-04 |
| POLR2A    | 51 | Microarray  | 9.57E-03 |
| POU1F1    | 52 | Microarray  | 1.08E-02 |
| POU4F1    | 51 | Subtraction | 8.43E-04 |
| PSIP1     | 51 | Microarray  | 1.09E-02 |
| RARA/RXRA | 53 | Microarray  | 1.23E-02 |
| RARB      | 50 | Subtraction | 6.26E-04 |
| RBPJ      | 50 | Microarray  | 9.98E-03 |
| REL       | 54 | Subtraction | 6.14E-04 |
| RELA      | 60 | Microarray  | 5.88E-03 |
| RELA      | 53 | Subtraction | 1.13E-04 |
| RORA      | 51 | Subtraction | 6.93E-04 |
| RUNX3     | 50 | Subtraction | 6.36E-04 |
| RXRA      | 51 | Subtraction | 6.24E-04 |
| SMAD2     | 51 | Subtraction | 5.89E-04 |
| SMAD4     | 51 | Subtraction | 6.00E-04 |
| SMAD4     | 51 | Microarray  | 1.13E-02 |
| SNAI1     | 51 | Microarray  | 9.02E-03 |
| SOX17     | 51 | Subtraction | 6.50E-04 |
| SOX2      | 52 | Microarray  | 1.06E-02 |
| SOX9      | 52 | Subtraction | 7.20E-04 |
| SOX9      | 51 | Microarray  | 8.41E-03 |
| SPI1      | 55 | Subtraction | 5.66E-04 |
| SPI1      | 55 | Microarray  | 9.60E-03 |
| SREBF1    | 61 | Microarray  | 5.08E-03 |
| SREBF2    | 59 | Microarray  | 6.47E-03 |
| SRF       | 63 | Microarray  | 4.46E-03 |
| STAT3     | 56 | Subtraction | 7.27E-05 |
| STAT3     | 53 | Microarray  | 3.29E-03 |
| TCERG1    | 51 | Microarray  | 1.11E-02 |
| TEAD1     | 51 | Subtraction | 7.09E-04 |
| TEAD2     | 50 | Subtraction | 7.25E-04 |
| THRA      | 55 | Microarray  | 1.03E-02 |
| TP63      | 57 | Subtraction | 3.84E-04 |
| TP63      | 61 | Microarray  | 5.41E-03 |
| TRIM28    | 51 | Subtraction | 7.61E-04 |
| TRIM28    | 51 | Microarray  | 9.43E-03 |
| UBTF      | 50 | Subtraction | 6.89E-04 |
| USF1      | 55 | Subtraction | 5.10E-04 |
| ZNF148    | 53 | Subtraction | 6.40E-04 |
| ZNF148    | 51 | Microarray  | 9.88E-03 |
