# Supplementary material
Source: PubMed Central journal article supplement (PMC3003944)
Supplement: NIHMS229912-supplement-06.pdf [file NIHMS229912-supplement-06.pdf]

| Factor        | Consensus                  | Description                       | Source   | Subtraction<br>BH p-value | Microarray DRG<br>BH p-value | Microarray Cerebellum<br>BH p-value |
|---------------|----------------------------|-----------------------------------|----------|---------------------------|------------------------------|-------------------------------------|
| CDP           | RATCRATA                   | Cut-like homeobox 1               | Xie      | 1.61E-01                  | 8.54E-04                     | 1.34E-01                            |
| CHX10         | CTAATTW                    | Ceh-10 homeo domain containing    | Xie      | 1.41E-02                  | 5.20E-01                     | 1.57E-01                            |
| DM_102        | ATGGYGGA                   | Discovered motif 102              | Xie      | 6.96E-02                  | 1.75E-03                     | 1.25E+00                            |
| DM_109        | YGTCCTTGR                  | Discovered motif 109              | Xie      | 3.06E-02                  | 1.01E+00                     | 7.18E-02                            |
| DM_114        | YTCCRNAGGY                 | Discovered motif 114              | Xie      | 9.80E-04                  | 1.01E-02                     | 6.30E-01                            |
| DM_115        | YRTCANNRCGC                | Discovered motif 115              | Xie      | 1.57E-05                  | 2.07E-08                     | 3.31E-01                            |
| DM_118        | GGCNRNWCTTYS               | Discovered motif 118              | Xie      | 5.70E-02                  | 1.14E-04                     | 2.85E-01                            |
| DM_123        | GGCNNMSMYNTTG              | Discovered motif 123              | Xie      | 8.12E-02                  | 6.18E-04                     | 4.49E-01                            |
| DM_138        | MYAATNNNNNNNGGC            | Discovered motif 138              | Xie      | 1.34E-02                  | 3.33E-06                     | 1.10E+00                            |
| DM_152        | WCAANNNYCAG                | Discovered motif 152              | Xie      | 5.59E-03                  | 1.65E-04                     | 4.40E-01                            |
| DM_158        | CCNNNNNNAAGWT              | Discovered motif 158              | Xie      | 1.48E-02                  | 5.59E-02                     | 6.95E-01                            |
| DM_162        | TAANNYSGCG                 | Discovered motif 162              | Xie      | 4.78E-07                  | 3.11E-03                     | 4.39E-01                            |
| DM_165        | CCAWNWWNNNGGC              | Discovered motif 165              | Xie      | 4.30E-01                  | 4.07E-02                     | 6.89E-01                            |
| DM_174        | WTGAAAT                    | Discovered motif 174              | Xie      | 1.50E-04                  | 5.29E-04                     | 4.23E-01                            |
| DM_19         | GKCGCNNNNNNNTGAYG          | Discovered motif 19               | Xie      | 4.32E-01                  | 5.14E-03                     | 8.64E-01                            |
| DM_27         | TGGNNNNNKCCAR              | Discovered motif 27               | Xie      | 1.80E-02                  | 7.45E-01                     | 5.92E-02                            |
| DM_29         | CTTTAAR                    | Discovered motif 29               | Xie      | 3.49E-02                  | 2.21E-02                     | 1.16E+00                            |
| DM_34         | CYTAGCAAY                  | Discovered motif 34               | Xie      | 3.82E-01                  | 4.27E-02                     | 3.60E-01                            |
| DM_63         | AAGWWRNYGGC                | Discovered motif 63               | Xie      | 7.66E-04                  | 6.84E-04                     | 5.23E-01                            |
| DM_66         | RACTNNRTTNC                | Discovered motif 66               | Xie      | 9.12E-03                  | 4.53E-01                     | 1.56E-01                            |
| DM_74         | GGAMTNNNNNTCCY             | Discovered motif 74               | Xie      | 7.61E-03                  | 8.08E-03                     | 9.89E-01                            |
| DM_80         | SNACANNYSYAGA              | Discovered motif 80               | Xie      | 1.01E-02                  | 6.19E-01                     | 5.46E-02                            |
| DM_81         | CGGAARNGGCNG               | Discovered motif 81               | Xie      | 6.98E-04                  | 8.05E-04                     | 2.04E-01                            |
| DM_91         | GTGGGTGK                   | Meningioma (disrupted in balance  | Xie      | 1.43E-03                  | 7.38E-03                     | 7.84E-01                            |
| DM_99         | ATCMNTCCGY                 | Discovered motif 99               | Xie      | 1.08E-02                  | 1.96E-01                     | 1.97E-01                            |
| ER            | TGACCT                     | Estrogen receptor                 | Xie      | 1.40E-01                  | 8.94E-03                     | 1.21E+00                            |
| ERRALPHA      | TGACCTTG                   | Estrogen related receptor, alpha  | Xie      | 4.56E-02                  | 1.60E-01                     | 8.43E-01                            |
| ESRRA         | TGACCTY                    | Estrogen related receptor, alpha  | Xie      | 5.33E-01                  | 2.05E-02                     | 1.15E+00                            |
| F\$ABAA_01    | YNNBYNCATTCCNNNNNN         | AbaA (Aspergillus nidulans)       | Transfac | 1.91E-02                  | 8.01E-01                     | 2.68E-01                            |
| F\$CBF1_B     | NRTCACRTGA                 | Cbf1 (Saccharomyces cerevisiae)   | Transfac | 5.81E-01                  | 3.35E-05                     | 1.73E-01                            |
| F\$DDE1_B     | CGCTCAGCC                  | Dde box (Neurospora crassa)       | Transfac | 1.34E-02                  | 1.49E-03                     | 3.96E-01                            |
| F\$FACBALL_Q2 | NNNNNKCCNNTCNNBCNNGGMNNNWN | Facb (Aspergillus nidulans)       | Transfac | 3.38E-02                  | 7.32E-02                     | 1.01E+00                            |
| F\$GBF_Q6     | TTGGGGGTG                  | Gbf (Dictyostelium discoideum)    | Transfac | 1.24E-02                  | 1.64E-01                     | 2.29E-01                            |
| F\$GCR1_01    | GGCTCCWC                   | Gcr1 (Saccharomyces cerevisiae)   | Transfac | 5.98E-01                  | 4.28E-02                     | 4.09E-01                            |
| F\$HAC1_Q2    | KGMCAGCGTGC                | Hac1 (Saccharomyces cerevisiae)   | Transfac | 3.13E-02                  | 1.27E+00                     | 1.02E+00                            |
| F\$HAP234_01  | AYCVDCCAATTANMN            | HAP2/3/5, yeast homolog to verte  | Transfac | 2.34E-02                  | 1.27E+00                     | 2.22E-01                            |
| F\$MAT1MC_02  | YCNATTGTTW                 | M-box interacting with Mat1-Mc († | Transfac | 4.37E-02                  | 9.63E-01                     | 9.82E-01                            |
| F\$MATALPHA2_ | INCATGTNAWN                | mating factor alpha2 (Schizosacch | Transfac | 1.74E-03                  | 2.28E-02                     | 1.21E+00                            |
| F\$STE12_Q4   | ATGAAAC                    | Ste12 ((Saccharomyces cerevisiae) | Transfac | 2.36E-03                  | 3.81E-02                     | 3.22E-01                            |
| F\$STRE_01    | TMAGGGGN                   | Stress response element           | Transfac | 1.16E-05                  | 2.16E-04                     | 9.52E-01                            |
| F\$XBP1_Q2    | CTTCGAG                    | Xbp1 (Saccharomyces cerevisiae)   | Transfac | 3.37E-02                  | 7.22E-06                     | 1.25E-01                            |

|              |                   |                                            |          |          |          |          |
|--------------|-------------------|--------------------------------------------|----------|----------|----------|----------|
| GFI-1        | TGATTRY           | Growth factor independent 1 trans          | Xie      | 2.27E-02 | 9.42E-01 | 6.44E-01 |
| I\$ABDB_Q6   | CATAAAA           | Abd-B ( <i>Drosophila melanogaster</i> )   | Transfac | 8.27E-03 | 4.01E-01 | 2.01E-01 |
| I\$BRCZ4_01  | WWWRTAAASAWAA     | Broad-Complex Z4 ( <i>Drosophila me</i>    | Transfac | 3.02E-02 | 3.25E-01 | 4.70E-01 |
| I\$CF1_01    | GGGGTCAYS         | Chorion factor 1 ( <i>Drosophila melar</i> | Transfac | 1.20E-01 | 2.20E-03 | 6.73E-01 |
| I\$CF1_02    | GGGGTCACG         | Chorion factor 1 ( <i>Drosophila melar</i> | Transfac | 2.63E-02 | 1.14E-04 | 6.10E-01 |
| I\$CF2II_01  | RTATATRTA         | Chorion factor 2 ( <i>Drosophila melar</i> | Transfac | 1.38E-02 | 8.21E-01 | 1.04E+00 |
| I\$PRD_Q6    | AAATTRY           | Paired ( <i>Drosophila melanogaster</i> )  | Transfac | 1.42E-02 | 8.55E-02 | 1.31E+00 |
| I\$SD_Q6     | CATTYCN           | Scalloped ( <i>Drosophila melanogast</i>   | Transfac | 1.72E-02 | 4.43E-03 | 2.11E-01 |
| I\$SGF3_Q6   | TTRTKCA           | SGF-3 ( <i>Bombyx mori</i> )               | Transfac | 2.07E-02 | 8.71E-01 | 4.26E-01 |
| IPF1         | TCATTAnY          | Pancreatic and duodenal homeobc            | Xie      | 7.41E-02 | 3.40E-02 | 2.92E-01 |
| LEF1         | CTTTGT            | Lymphoid enhancer-binding factor           | Xie      | 3.70E-02 | 8.15E-01 | 2.62E-01 |
| MEIS1        | TGACAGNY          | Meis homeobox 1                            | Xie      | 5.98E-03 | 6.70E-01 | 4.48E-01 |
| N\$TRA1_01   | TGGGWGGT          | TRAnformer ( <i>Caenorhabditis eleg</i>    | Transfac | 8.12E-03 | 1.30E-01 | 5.01E-01 |
| N\$TRA1_02   | TGGGWGGT          | TRAnformer ( <i>Caenorhabditis eleg</i>    | Transfac | 8.08E-03 | 1.30E-01 | 5.02E-01 |
| NF-E2        | TGASTMAGC         | v-maf musculoaponeurotic fibrosa           | Xie      | 1.99E-01 | 4.14E-02 | 1.14E+00 |
| NF-MUE1      | CGGCCATYK         | YY1 transcription factor                   | Xie      | 2.15E-01 | 3.08E-02 | 3.95E-01 |
| NKX6-2       | TAATTA            | NK6 homeobox 2                             | Xie      | 1.40E-02 | 5.19E-01 | 1.57E-01 |
| OCTAMER      | YATGYAAAT         | Octamer Motif                              | Xie      | 5.06E-01 | 2.74E-03 | 1.00E+00 |
| OCT-X        | YATGnWAAT         | Octamer binding transcription fact         | Xie      | 1.73E-03 | 1.30E-03 | 1.19E-01 |
| P\$ABI4_01   | NNGCACCGCCC       | Abi4 ( <i>Zea mays</i> )                   | Transfac | 5.57E-08 | 1.54E-03 | 7.21E-01 |
| P\$ABZ1_01   | KKNTKACGTGGNNN    | Abz ( <i>Lycopersicon esculentum</i> )     | Transfac | 1.26E+00 | 2.79E-02 | 4.22E-01 |
| P\$DOF2_01   | NNNWAAAGCNN       | Dof2 zing finger ( <i>Zea mays</i> )       | Transfac | 7.59E-03 | 3.00E-03 | 6.60E-02 |
| P\$EMBP1_Q2  | GCCACGTGDN        | EmBP-1b ( <i>Triticum aestivum</i> )       | Transfac | 8.89E-02 | 3.23E-02 | 1.46E-01 |
| P\$HBP1A_Q2  | GNCACGTGGC        | Hbp1a ( <i>Triticum aestivum</i> )         | Transfac | 8.70E-01 | 1.34E-02 | 4.57E-01 |
| P\$HBP1B_Q6  | NKCNHACGTGTCAC    | Hbp1b ( <i>Triticum aestivum</i> )         | Transfac | 1.22E+00 | 3.95E-02 | 1.07E+00 |
| P\$LIM1_01   | CCACCANMNNCN      | Lim1 ( <i>Tabacco, Nicotiana tabacum</i>   | Transfac | 1.47E-04 | 2.09E-02 | 4.62E-01 |
| P\$PIF3_02   | NNNVCCACGTGGNMVNN | Pif3 ( <i>Arabidopsis thaliana</i> )       | Transfac | 7.58E-03 | 5.17E-03 | 1.27E-01 |
| P\$RAV1_02   | NNCACCTGRNNN      | Rav1 ( <i>Arabidopsis thaliana</i> )       | Transfac | 8.06E-03 | 2.64E-01 | 3.96E-01 |
| P\$ROM_Q2    | GCCACSTCA         | Rom2 ( <i>Phaseolus vulgaris</i> )         | Transfac | 3.95E-01 | 1.87E-02 | 5.23E-02 |
| SF-1         | TGACCTTG          | Steroidogenic Factor 1 (NR5A1)             | Xie      | 4.54E-02 | 1.60E-01 | 8.42E-01 |
| STAT         | TCCCRGAAR         | Signal transducer and activator of         | Xie      | 2.31E-03 | 1.56E-06 | 5.38E-02 |
| STAT1        | TNCATNTCCYR       | Signal transducer and activator of         | Xie      | 3.35E-03 | 9.81E-01 | 2.76E-01 |
| T3R          | TGACCTY           | Thyroid hormone receptor                   | Xie      | 5.32E-01 | 2.04E-02 | 1.15E+00 |
| TATA         | TATAAA            | TATA Motif                                 | Xie      | 9.84E-03 | 2.46E-05 | 3.60E-01 |
| TBP          | TATAAA            | TATA Box binding protein                   | Xie      | 9.80E-03 | 2.45E-05 | 3.59E-01 |
| V\$AP2_Q6    | MKCCCSCNGGCG      | Activator protein 2                        | Transfac | 5.95E-01 | 4.75E-02 | 9.81E-02 |
| V\$AP2REP_01 | CAGTGGG           | Transcription factor Ap2 gamma             | Transfac | 2.02E-03 | 1.93E-03 | 4.85E-01 |
| V\$AP3_Q6    | TCYMMATT          | AP-3 / Unknown                             | Transfac | 2.27E-02 | 1.05E+00 | 2.62E-01 |
| V\$AP4_Q6_01 | RNCAGCTGC         | Transcription factor Ap4                   | Transfac | 3.63E-04 | 6.22E-02 | 1.05E-01 |
| V\$AR_Q6     | WGAGCANRN         | Androgen receptor half site matrix         | Transfac | 7.71E-04 | 3.77E-02 | 3.90E-01 |
| V\$ATF_01    | CNSTGACGTNNNYC    | Activating transcription factor            | Transfac | 1.21E-01 | 4.17E-02 | 1.03E+00 |
| V\$ATF_B     | NTGACGTCANYS      | Activating transcription factor            | Transfac | 2.17E-02 | 1.20E-03 | 4.41E-01 |
| V\$ATF1_Q6   | CYYTGACGTCA       | Activating transcription factor 1          | Transfac | 1.18E+00 | 7.92E-03 | 2.80E-01 |

|               |                        |                                      |          |          |          |          |
|---------------|------------------------|--------------------------------------|----------|----------|----------|----------|
| V\$BRCA_01    | KTNNGTTG               | BRCA1 containing protein complex     | Transfac | 1.93E-02 | 2.19E-02 | 6.77E-01 |
| V\$CBF_02     | NNNNNTGYGGTYNNNN       | Core binding factor (Bos Taurus)     | Transfac | 1.71E-03 | 1.95E-04 | 6.07E-02 |
| V\$CEBPB_01   | RNRTKDNGMAAKNN         | CCAAT/enhancer binding protein b     | Transfac | 4.13E-01 | 4.95E-02 | 5.61E-01 |
| V\$CRX_Q4     | YNNNTAATCYSMN          | Retina and anterior neural fold hor  | Transfac | 3.02E-02 | 3.77E-01 | 1.23E+00 |
| V\$E12_Q6     | RRCAGGTGNCV            | E12 (Xenopus laevis)                 | Transfac | 1.84E-02 | 7.76E-04 | 4.06E-01 |
| V\$E2A_Q2     | NCACCTGYINCENKN        | Myogenin (myogenic factor 4)         | Transfac | 8.85E-05 | 1.33E-02 | 2.67E-01 |
| V\$E2F_Q6_01  | NKCGCGCSAAAN           | E2F transcription factor 7           | Transfac | 1.52E-01 | 2.14E-02 | 1.24E-01 |
| V\$EGR_Q6     | GTGGGSGCRRS            | Early growth response 3              | Transfac | 9.83E-04 | 9.36E-04 | 4.82E-01 |
| V\$ER_Q6_02   | NAGGTCANNNY            | Estrogen receptor                    | Transfac | 8.80E-01 | 4.52E-03 | 1.21E+00 |
| V\$GATA3_03   | ANAGATMWWA             | GATA-binding factor 3 (Gallus gallu  | Transfac | 2.70E-02 | 1.84E-01 | 1.12E-01 |
| V\$GATA6_01   | NNNGATWANN             | Gata6 (Xenopus laevis)               | Transfac | 1.58E-02 | 3.10E-03 | 6.42E-02 |
| V\$GR_Q6_01   | NNTGTYCT               | Glucocorticoid receptor (NR3C1)      | Transfac | 1.82E-01 | 2.24E-02 | 2.20E-01 |
| V\$HEB_Q6     | RCCWGCTG               | Transcription factor 12              | Transfac | 1.10E-02 | 1.56E-02 | 4.63E-01 |
| V\$HIC1_03    | NNNGGKTGCCSNNNNN       | Hypermethylated in cancer 1          | Transfac | 3.65E-03 | 4.59E-03 | 1.24E-01 |
| V\$IK2_01     | NNNTGGGAWNNC           | IKAROS family zinc finger 1 (Ikaros) | Transfac | 2.34E-01 | 4.78E-02 | 2.74E-01 |
| V\$IRF_Q6_01  | RAAANTGAAAN            | Interferon regulatory factor         | Transfac | 4.59E-02 | 1.70E-01 | 3.53E-01 |
| V\$KAISO_01   | NTCTGCNAN              | Zinc finger and BTB domain contai    | Transfac | 1.85E-02 | 6.43E-01 | 7.70E-01 |
| V\$KROX_Q6    | CCCGCCCCRCCC           | Early growth response 4              | Transfac | 1.43E-02 | 6.35E-05 | 4.62E-01 |
| V\$LMO2COM_0  | NMGATANS               | LIM domain only 2 (rhombotin-like    | Transfac | 4.40E-02 | 8.47E-02 | 7.00E-02 |
| V\$MEF2_02    | NNNNNNKCTAWAAATAGMNNNN | Myocyte enhancer factor 2A           | Transfac | 4.61E-01 | 2.75E-02 | 4.24E-01 |
| V\$MYB_Q3     | NNNGNCAGTTN            | c-Myb (Gallus gallus)                | Transfac | 5.15E-01 | 2.71E-03 | 8.02E-01 |
| V\$MYB_Q6     | NNNAACTGNC             | c-Myb (Gallus gallus)                | Transfac | 1.37E-02 | 1.76E-01 | 1.30E-01 |
| V\$MYCMAX_01  | NNACCAGTGGTNN          | c-Myc:Max heterodimer                | Transfac | 3.64E-02 | 1.98E-01 | 1.23E+00 |
| V\$MYCMAX_B   | GCCAYGYGSN             | c-Myc:Max heterodimer                | Transfac | 6.35E-02 | 4.68E-03 | 5.72E-01 |
| V\$MYOD_Q6_01 | CNGNRNCAGGTGNGNAN      | Myogenin (myogenic factor 4)         | Transfac | 1.08E+00 | 1.05E-02 | 1.23E+00 |
| V\$MZF1_02    | KNNNKAGGGGNA           | Myeloid zinc finger 1                | Transfac | 9.00E-03 | 4.96E-01 | 5.23E-01 |
| V\$NFY_Q6     | TRRCAATSRN             | Nuclear transcription factor Y, gam  | Transfac | 1.22E-02 | 6.85E-05 | 6.88E-02 |
| V\$NKX62_Q2   | NWADTAAWTANN           | NK related homeobox factor 6-2       | Transfac | 4.55E-02 | 6.52E-01 | 4.01E-01 |
| V\$OCT1_03    | NNNRATAATNANN          | Octamer factor 1                     | Transfac | 2.08E-02 | 1.21E-01 | 2.73E-01 |
| V\$OCT1_B     | TATGCAAATN             | Octamer binding factor 1             | Transfac | 1.55E-01 | 4.50E-02 | 9.36E-01 |
| V\$OCT1_Q6    | NNNNATGCAAATNAN        | Octamer factor 1                     | Transfac | 4.55E-02 | 4.68E-02 | 1.25E+00 |
| V\$OSF2_Q6    | ACCACANM               | Runt related transcription factor 2  | Transfac | 5.34E-01 | 4.13E-02 | 7.37E-02 |
| V\$P53_02     | NGRCWTGYCY             | Tumor suppressor p53                 | Transfac | 1.05E-02 | 2.53E-01 | 3.51E-01 |
| V\$P53_DECAME | RGRCAWGNCY             | Tumor suppressor p53                 | Transfac | 6.82E-02 | 3.81E-02 | 4.38E-01 |
| V\$PAX3_B     | NNNNNNCGTCACGTYNNNNNN  | Paired box gene 3                    | Transfac | 3.21E-03 | 8.25E-01 | 1.26E+00 |
| V\$PITX2_Q2   | WNATAATCCAR            | Paired-like homeodomain transcrip    | Transfac | 2.62E-03 | 6.41E-01 | 1.28E+00 |
| V\$RFX1_02    | NNGTNRNCRATRGYAACNN    | Regulatory factor X, 1 (influences   | Transfac | 2.55E-01 | 1.08E-02 | 4.39E-01 |
| V\$SOX5_01    | NNAACAATNN             | SRY (sex determining region Y)-bo    | Transfac | 3.18E-01 | 9.65E-03 | 4.07E-01 |
| V\$SP1_01     | GGGGCGGGGT             | Stimulating protein 1                | Transfac | 1.22E-02 | 5.88E-11 | 3.40E-01 |
| V\$STRA13_01  | NYSTACGTGABNN          | Basic helix-loop-helix family, mem   | Transfac | 1.02E+00 | 4.12E-04 | 8.89E-01 |
| V\$T3R_01     | SNNTRAGGTCACGSNN       | Thyroid hormone receptor, alpha (    | Transfac | 1.02E+00 | 2.07E-02 | 1.34E+00 |
| V\$T3R_Q6     | MNTGWCTN               | Thyroid hormone receptor, beta (e    | Transfac | 3.43E-02 | 1.95E-01 | 2.05E-01 |
| V\$TBP_01     | TATAAATW               | TATA binding protein                 | Transfac | 1.67E-02 | 9.42E-03 | 1.17E-01 |

|                |                |                                  |          |          |          |          |
|----------------|----------------|----------------------------------|----------|----------|----------|----------|
| V\$TBP_Q6      | TTTATAN        | TATA binding protein (Saccharomy | Transfac | 2.96E-03 | 4.72E-03 | 6.79E-02 |
| V\$TBX5_Q2     | YNRGGTGTKV     | T-box 5                          | Transfac | 1.19E-04 | 1.97E-01 | 1.15E+00 |
| V\$TFE_Q6      | TCATGTGN       | Transcription factor EC          | Transfac | 1.69E-01 | 5.69E-03 | 4.56E-01 |
| V\$UF1H3BETA_C | GGYGGGGGAGGGGC | UF1-H3beta                       | Transfac | 2.35E-02 | 8.69E-01 | 8.26E-02 |
| V\$USF_Q6_Q1   | NRCCACGTGASN   | Upstream transcription factor    | Transfac | 6.80E-01 | 4.59E-02 | 6.98E-01 |
