# Supplementary material
Source: PubMed Central journal article supplement (PMC3003944)
Supplement: NIHMS229912-supplement-08.pdf [file NIHMS229912-supplement-08.pdf]

| Symbol   | Gene         | DRG ΔCt | CGN ΔCt | Fold DRG | BH p-value |
|----------|--------------|---------|---------|----------|------------|
| A2m      | Alpha-2-ma   | 8.03    | 8.06    | 1.03     | 9.59E-01   |
| Actb     | Actin, beta  | -1.32   | -2.16   | -1.80    | 2.65E-02   |
| Bcl2l1   | Bcl2-like 1  | 3.93    | 2.76    | -2.25    | 2.82E-02   |
| Ccnd1    | Cyclin D1    | 5.19    | 3.37    | -3.53    | 2.30E-02   |
| Cdkn1a   | Cyclin-depe  | 2.37    | 3.99    | 3.07     | 3.42E-02   |
| Cebpb    | CCAAT/enf    | 6.64    | 8.80    | 4.48     | 6.42E-03   |
| Crk      | V-crk sarco  | 4.67    | 4.64    | -1.02    | 9.51E-01   |
| Crp      | C-reactive p | 14.67   | 14.11   | -1.47    | 4.70E-01   |
| Csf1r    | Colony stim  | 10.81   | 7.97    | -7.11    | 9.42E-03   |
| Csf2rb2  | Colony stim  | 12.21   | 11.58   | -1.54    | 1.57E-01   |
| Cxcl9    | Chemokine    | 15.00   | 15.47   | 1.39     | 5.18E-01   |
| Egfr     | Epidermal g  | 9.04    | 4.39    | -25.18   | 3.55E-03   |
| Epor     | Erythropoie  | 11.94   | 10.07   | -3.67    | 1.53E-02   |
| F2       | Coagulation  | 12.66   | 11.47   | -2.28    | 1.32E-01   |
| F2r      | Coagulation  | 5.02    | 3.88    | -2.19    | 9.03E-02   |
| Fas      | Fas (TNF re  | 12.06   | 13.49   | 2.69     | 1.51E-01   |
| Fcgr1a   | Fc receptor  | 15.61   | 15.47   | -1.10    | 8.49E-01   |
| Fcgr1    | Fc receptor  | 10.76   | 8.43    | -5.00    | 3.37E-02   |
| Gapdh    | Glyceraldel  | -2.45   | -1.72   | 1.65     | 1.07E-01   |
| Gata3    | GATA bindi   | 14.92   | 13.19   | -3.30    | 1.56E-02   |
| Gbp1     | Guanylate p  | 14.43   | 14.05   | -1.30    | 8.04E-01   |
| Ghr      | Growth hor   | 4.26    | 6.57    | 4.94     | 9.80E-03   |
| Gusb     | Glucuronid   | 5.89    | 5.69    | -1.15    | 3.90E-01   |
| Hmga1    | High mobili  | 6.12    | 5.45    | -1.59    | 2.72E-02   |
| Hprt1    | Hypoxanth    | 0.02    | 1.73    | 3.28     | 5.86E-03   |
| Hsp90ab1 | Heat shock   | -2.12   | -1.81   | 1.24     | 2.34E-01   |
| Ifnar1   | Interferon p | 3.86    | 4.61    | 1.68     | 9.88E-03   |
| Ifng     | Interferon g | 15.61   | 15.28   | -1.26    | 6.16E-01   |
| Ifngr1   | Interferon g | 5.97    | 6.28    | 1.24     | 3.77E-01   |
| Il10ra   | Interleukin  | 7.47    | 9.43    | 3.89     | 1.60E-02   |
| Il10rb   | Interleukin  | 5.90    | 9.74    | 14.35    | 1.72E-03   |
| Il20     | Interleukin  | 15.61   | 15.14   | -1.38    | 5.87E-01   |
| Il2ra    | Interleukin  | 13.71   | 14.63   | 1.90     | 8.43E-02   |
| Il2rg    | Interleukin  | 9.31    | 8.57    | -1.66    | 6.40E-02   |
| Il4      | Interleukin  | 15.61   | 15.47   | -1.10    | 8.38E-01   |
| Il4ra    | Interleukin  | 5.07    | 7.11    | 4.11     | 2.06E-02   |
| Il6st    | Interleukin  | 3.17    | 6.45    | 9.69     | 6.84E-03   |
| Irf1     | Interferon   | 8.04    | 11.17   | 8.77     | 1.48E-02   |
| Isg15    | ISG15 ubiq   | 7.78    | 8.73    | 1.93     | 7.65E-02   |
| Isgf3g   | Interferon p | 6.41    | 6.36    | -1.03    | 9.53E-01   |
| Jak1     | Janus kinas  | 3.84    | 5.52    | 3.22     | 2.09E-02   |
| Jak2     | Janus kinas  | 6.51    | 5.87    | -1.56    | 6.00E-02   |
| Jun      | Jun oncoge   | 3.43    | 4.41    | 1.99     | 2.80E-02   |
| Junb     | Jun-B onco   | 7.47    | 9.94    | 5.55     | 5.43E-02   |
| Mmp3     | Matrix met   | 15.61   | 15.47   | -1.10    | 8.28E-01   |
| Mpl      | Myeloproli   | 15.35   | 15.44   | 1.07     | 8.41E-01   |

|        |                                                      |       |       |        |          |
|--------|------------------------------------------------------|-------|-------|--------|----------|
| Myc    | Myelocytosarcoma                                     | 6.19  | 7.74  | 2.93   | 1.58E-02 |
| Nfkb1  | Nuclear factor kappa B                               | 6.84  | 6.25  | -1.50  | 1.97E-01 |
| Nos2   | Nitric oxide synthase 2                              | 14.66 | 11.14 | -11.40 | 1.29E-04 |
| Nr3c1  | Nuclear receptor subfamily 3C                        | 7.20  | 6.23  | -1.96  | 9.37E-02 |
| Oas1a  | 2'-5' oligoadenylate synthetase 1A                   | 12.83 | 13.51 | 1.61   | 4.28E-01 |
| Osm    | Oncostatin M receptor                                | 11.69 | 12.66 | 1.97   | 1.07E-01 |
| Pdgfra | Platelet-derived growth factor receptor alpha        | 7.24  | 5.49  | -3.36  | 1.45E-02 |
| Pias1  | Protein inhibitor of activated signaling molecules 1 | 6.03  | 5.36  | -1.59  | 1.19E-01 |
| Prl    | Prolactin                                            | 15.61 | 13.95 | -3.15  | 3.39E-02 |
| Prlr   | Prolactin receptor                                   | 8.18  | 12.84 | 25.27  | 1.55E-02 |
| Ptpn1  | Protein tyrosine phosphatase non-receptor type 1     | 4.52  | 3.84  | -1.59  | 1.07E-01 |
| Ptpnrc | Protein tyrosine phosphatase non-receptor type 11    | 11.69 | 11.15 | -1.44  | 3.96E-01 |
| Pzp    | Pregnancy zone protein                               | 13.47 | 14.98 | 2.85   | 6.03E-01 |
| Saa3   | Serum amyloid A3                                     | 15.61 | 15.47 | -1.10  | 8.17E-01 |
| Sfpi1  | SFV proviral integration 1                           | 9.68  | 7.99  | -3.21  | 1.60E-02 |
| Sh2b1  | SH2B adaptor protein 1                               | 5.93  | 5.12  | -1.75  | 2.26E-02 |
| Sh2b2  | SH2B adaptor protein 2                               | 9.62  | 7.70  | -3.79  | 2.05E-02 |
| Sit1   | Suppressor of cytokine signaling 1                   | 15.04 | 14.31 | -1.66  | 1.55E-01 |
| Sla2   | Src-like adaptor 2                                   | 15.61 | 15.47 | -1.10  | 8.07E-01 |
| Smad1  | MAD homolog 1                                        | 5.41  | 5.43  | 1.02   | 9.55E-01 |
| Smad2  | MAD homolog 2                                        | 4.10  | 4.62  | 1.44   | 1.20E-01 |
| Smad3  | MAD homolog 3                                        | 10.10 | 6.78  | -9.99  | 1.07E-04 |
| Smad4  | MAD homolog 4                                        | 3.45  | 1.66  | -3.47  | 1.29E-02 |
| Smad5  | MAD homolog 5                                        | 7.01  | 4.76  | -4.76  | 6.03E-03 |
| Socs1  | Suppressor of cytokine signaling 1                   | 7.88  | 9.20  | 2.51   | 2.05E-02 |
| Socs2  | Suppressor of cytokine signaling 2                   | 6.09  | 7.18  | 2.13   | 2.16E-02 |
| Socs3  | Suppressor of cytokine signaling 3                   | 9.21  | 10.44 | 2.36   | 3.26E-01 |
| Socs4  | Suppressor of cytokine signaling 4                   | 6.52  | 6.32  | -1.14  | 3.91E-01 |
| Socs5  | Suppressor of cytokine signaling 5                   | 8.79  | 10.07 | 2.42   | 3.81E-02 |
| Sp1    | Transcription factor SP1                             | 9.01  | 7.07  | -3.83  | 6.19E-02 |
| Src    | Rous sarcoma virus oncogene                          | 4.68  | 4.25  | -1.34  | 3.29E-01 |
| Stam   | Signal transducer and activator of myeloid cells     | 3.37  | 3.79  | 1.34   | 1.95E-01 |
| Stat1  | Signal transducer and activator of myeloid cells 1   | 6.24  | 7.18  | 1.92   | 2.92E-02 |
| Stat2  | Signal transducer and activator of myeloid cells 2   | 5.61  | 6.25  | 1.56   | 3.31E-01 |
| Stat3  | Signal transducer and activator of myeloid cells 3   | 2.19  | 4.95  | 6.79   | 7.42E-03 |
| Stat4  | Signal transducer and activator of myeloid cells 4   | 15.61 | 15.15 | -1.37  | 6.04E-01 |
| Stat5a | Signal transducer and activator of myeloid cells 5A  | 13.77 | 13.50 | -1.20  | 8.87E-01 |
| Stat5b | Signal transducer and activator of myeloid cells 5B  | 14.51 | 14.82 | 1.24   | 7.88E-01 |
| Stat6  | Signal transducer and activator of myeloid cells 6   | 4.25  | 8.40  | 17.78  | 1.35E-04 |
| Stub1  | STIP1 homolog 1                                      | 3.82  | 3.93  | 1.08   | 8.52E-01 |
| Tyk2   | Tyrosine kinase 2                                    | 7.50  | 7.69  | 1.15   | 5.38E-01 |
| Usf1   | Upstream stimulatory factor 1                        | 5.56  | 4.61  | -1.93  | 2.07E-02 |
| Yy1    | YY1 transcription factor                             | 4.14  | 3.59  | -1.46  | 1.13E-01 |
